# Supplementary material for: Sperm Proteome Maturation in the Mouse Epididymis
Source: PLoS One. 2015 Nov 10;10(11):e0140650. doi: 10.1371/journal.pone.0140650 (PMC4640836; doi:10.1371/journal.pone.0140650)
Supplement: S2 Table — Proteins added or removed during epididymal transit, inferred from the core sperm proteome (see Materials and Methods) for each segment. Also listed are the 47 proteins common to the caput and cauda but not found in the corpus. (XLSX) [file pone.0140650.s003.xlsx]

## Sheet: (A) Added & Removed
Supplemental Table 2 - Inferred proteins added and removed from sperm in each epididymal segment
REMOVED FROM CAPUT (i.e, not ID'd in Corpus)							ADDED TO CORPUS (i.e., not ID'd in Caput)							REMOVED FROM CORPUS (i.e., not ID'd in Cauda)							ADDED TO CAUDA (i.e., not ID'd in Corpus)
DESCRIPTION	MW	GI	REFSEQ	GENE NAME	ENSEMBL GENE ID		DESCRIPTION	MW	GI	REFSEQ	GENE NAME	ENSEMBL GENE ID		DESCRIPTION	MW	GI	REFSEQ	GENE NAME	ENSEMBL GENE ID		DESCRIPTION	MW	GI	REFSEQ	GENE NAME	ENSEMBL GENE ID
hypothetical protein LOC68554 [Mus musculus]	9 kDa	294345426	NP_001170873	1110001A16Rik	ENSMUSG00000062691		formation of mitochondrial complexes 1 homolog [Mus musculus]	13 kDa	13384728	NP_079639	1110001J03Rik	ENSMUSG00000019689		hypothetical protein LOC66050 [Mus musculus]	16 kDa	13384686	NP_079595	0610009B22Rik	ENSMUSG00000007777		hypothetical protein LOC75434 [Mus musculus]	23 kDa	21729773	NP_083561	1700001C02Rik	ENSMUSG00000029182
selenoprotein O [Mus musculus]	74 kDa	81295807	NP_082181	1300018J18Rik	ENSMUSG00000035757		bcl10-interacting CARD protein [Mus musculus]	21 kDa	21312030	NP_081014	1110007C09Rik	ENSMUSG00000037960		formation of mitochondrial complexes 1 homolog [Mus musculus]	13 kDa	13384728	NP_079639	1110001J03Rik	ENSMUSG00000019689		hypothetical protein LOC75467 [Mus musculus]	28 kDa	254675147	NP_083574	1700011E24Rik	ENSMUSG00000036557
hypothetical protein LOC75434 [Mus musculus]	23 kDa	21729773	NP_083561	1700001C02Rik	ENSMUSG00000029182		transmembrane and coiled-coil domain-containing protein C6orf129 homolog isoform 1 [Mus musculus]	12 kDa	254939555	NP_001157213	1110021J02Rik	ENSMUSG00000024018		hypothetical protein LOC68550 [Mus musculus]	42 kDa	134053922	NP_899098	1110002N22Rik	ENSMUSG00000046909		protein TSC21 [Mus musculus]	21 kDa	58037359	NP_083101	1700011F03Rik	ENSMUSG00000051896
rhoA activator C11orf59 homolog [Mus musculus]	18 kDa	242332593	NP_079881	2400001E08Rik	ENSMUSG00000030842		hypothetical protein LOC72244 [Mus musculus]	15 kDa	145864467	NP_001078854	1600014C10Rik	ENSMUSG00000054676		transmembrane and coiled-coil domain-containing protein C6orf129 homolog isoform 1 [Mus musculus]	12 kDa	254939555	NP_001157213	1110021J02Rik	ENSMUSG00000024018		hypothetical protein LOC69364 [Mus musculus]	23 kDa	242397497	NP_081332	1700012P22Rik	ENSMUSG00000028589
hypothetical protein LOC75593 [Mus musculus]	26 kDa	254939620	NP_083629	2410003K15Rik	ENSMUSG00000029815		hypothetical protein LOC75462 isoform 2 [Mus musculus]	13 kDa	285401645	NP_001165562	1700001C19Rik	ENSMUSG00000047150		hypothetical protein LOC68832 isoform 2 [Mus musculus]	27 kDa	268370114	NP_001161239	1110057K04Rik	ENSMUSG00000037669		hypothetical protein LOC69439 [Mus musculus]	113 kDa	294460010	NP_001170908	1700016M24Rik	ENSMUSG00000022603
hypothetical protein LOC77034 precursor [Mus musculus]	69 kDa	225543561	NP_084117	2510039O18Rik	ENSMUSG00000044496		hypothetical protein LOC72215 [Mus musculus]	18 kDa	118130874	NP_082432	1700001P01Rik	ENSMUSG00000018543		hypothetical protein LOC72244 [Mus musculus]	15 kDa	145864467	NP_001078854	1600014C10Rik	ENSMUSG00000054676		hypothetical protein LOC76406 [Mus musculus]	56 kDa	251823732	NP_083874	1700019B03Rik	ENSMUSG00000040340
hypothetical protein LOC72792 isoform 1 [Mus musculus]	30 kDa	222418599	NP_001138464	2810459M11Rik	ENSMUSG00000026227		putative uncharacterized actin family protein C20orf134 homolog [Mus musculus]	38 kDa	284172505	NP_001165111	1700007I08Rik	ENSMUSG00000078129		hypothetical protein LOC75462 isoform 2 [Mus musculus]	13 kDa	285401645	NP_001165562	1700001C19Rik	ENSMUSG00000047150		hypothetical protein LOC71863 [Mus musculus]	57 kDa	254553418	NP_082242	1700019O17Rik
hypothetical protein LOC70564 precursor [Mus musculus]	24 kDa	27229101	NP_081740	5730469M10Rik	ENSMUSG00000021792		hypothetical protein LOC75472 [Mus musculus]	21 kDa	124486893	NP_001074744	1700009P17Rik	ENSMUSG00000026649		SRA stem-loop-interacting RNA-binding protein, mitochondrial precursor [Mus musculus]	13 kDa	283046784	NP_081234	1810035L17Rik	ENSMUSG00000021040		hypothetical protein LOC71868 [Mus musculus]	52 kDa	58037271	NP_082246	1700023E05Rik	ENSMUSG00000029248
hypothetical protein LOC71617 [Mus musculus]	79 kDa	139947660	NP_938038	9130011E15Rik	ENSMUSG00000039901		hypothetical protein LOC76382 [Mus musculus]	15 kDa	21313178	NP_083863	1700012A03Rik	ENSMUSG00000029766		hypothetical protein LOC69478 [Mus musculus]	18 kDa	221139775	NP_081366	2300009A05Rik	ENSMUSG00000032403		hypothetical protein LOC66346 [Mus musculus]	17 kDa	225903452	NP_079779	1700029P11Rik	ENSMUSG00000061633
hypothetical protein LOC231014 precursor [Mus musculus]	114 kDa	110625972	NP_766294	9330182L06Rik	ENSMUSG00000056004		hypothetical protein LOC69428 [Mus musculus]	17 kDa	113374150	NP_081353	1700016C15Rik	ENSMUSG00000015962		adipocyte plasma membrane-associated protein [Mus musculus]	46 kDa	21313668	NP_082253	2310001A20Rik	ENSMUSG00000033096		hypothetical protein LOC74279 [Mus musculus]	32 kDa	241982800	NP_083127	1700080O16Rik	ENSMUSG00000031118
hypothetical protein LOC68115 precursor [Mus musculus]	33 kDa	145587094	NP_001074650	9430016H08Rik	ENSMUSG00000025971		hypothetical protein LOC67507 [Mus musculus]	27 kDa	13385716	NP_080484	1700019N19Rik	ENSMUSG00000026931		SCAN domain containing 3 [Mus musculus]	84 kDa	134053873	NP_898911	2410018M08Rik	ENSMUSG00000034173		hypothetical protein LOC76627 [Mus musculus]	43 kDa	147906142	NP_083956	1700110M21Rik	ENSMUSG00000042888
4-aminobutyrate aminotransferase, mitochondrial isoform 1 precursor [Mus musculus]	56 kDa	37202121	NP_766549	Abat	ENSMUSG00000057880		hypothetical protein LOC75556 [Mus musculus]	34 kDa	268370161	NP_083611	1700026D08Rik	ENSMUSG00000011154		protein midA homolog, mitochondrial precursor [Mus musculus]	48 kDa	158937256	NP_082887	2410091C18Rik	ENSMUSG00000024082		hypothetical protein LOC320869 [Mus musculus]	15 kDa	124301188	NP_796253	4732415M23Rik	ENSMUSG00000048478
abhydrolase domain-containing protein 13 [Mus musculus]	39 kDa	124487441	NP_001074588	Abhd13	ENSMUSG00000040396		hypothetical protein LOC67483 [Mus musculus]	27 kDa	13385700	NP_080464	1700028P14Rik	ENSMUSG00000033053		hypothetical protein LOC66469 [Mus musculus]	22 kDa	27754130	NP_079858	2810405K02Rik	ENSMUSG00000029059		hypothetical protein LOC629499 [Mus musculus]	120 kDa	160333434	NP_001034646	4922505G16Rik	ENSMUSG00000074627
abhydrolase domain-containing protein 14B [Mus musculus]	22 kDa	171460960	NP_083907	Abhd14b	ENSMUSG00000042073		TIM21-like protein, mitochondrial [Mus musculus]	28 kDa	21313128	NP_080245	1700034H14Rik	ENSMUSG00000024645		selenoprotein T precursor [Mus musculus]	22 kDa	143770878	NP_001035486	2810407C02Rik	ENSMUSG00000075700		hypothetical protein LOC432479 [Mus musculus]	24 kDa	157951639	NP_001014836	4930404N11Rik	ENSMUSG00000020234
abhydrolase domain-containing protein 2 [Mus musculus]	48 kDa	40254377	NP_061281	Abhd2	ENSMUSG00000039202		hypothetical protein LOC73297 [Mus musculus]	20 kDa	13386312	NP_082770	1700034l23Rik	ENSMUSG00000074619		RIKEN cDNA 2900064A13 precursor [Mus musculus]	26 kDa	19526956	NP_598510	2900064A13Rik	ENSMUSG00000055943		hypothetical protein LOC242408 [Mus musculus]	54 kDa	30425280	NP_780726	4930412F15Rik	ENSMUSG00000043633
acyl-Coenzyme A dehydrogenase family, member 10-like [Mus musculus]	61 kDa	257467675	NP_848914	Acad12	ENSMUSG00000042647		hypothetical protein LOC67343 [Mus musculus]	16 kDa	50979268	NP_080375	1700065I17Rik	ENSMUSG00000032900		hypothetical protein LOC70920 [Mus musculus]	29 kDa	46559372	NP_081879	4921511H03Rik	ENSMUSG00000040514		RIKEN cDNA 4930443G12 [Mus musculus]	53 kDa	198278549	NP_083330	4930443G12Rik	ENSMUSG00000027880
acyl-coenzyme A thioesterase 8 [Mus musculus]	36 kDa	254587964	NP_573503	Acot8	ENSMUSG00000017307		SRA stem-loop-interacting RNA-binding protein, mitochondrial precursor [Mus musculus]	13 kDa	283046784	NP_081234	1810035L17Rik	ENSMUSG00000021040		transmembrane protein C2orf18 homolog precursor [Mus musculus]	41 kDa	188497646	NP_783606	4930471M23Rik	ENSMUSG00000029175		PREDICTED: hypothetical protein LOC100502590 [Mus musculus]	22 kDa	309264200	XP_003086211	4930469G21Rik
acyl-CoA synthetase family member 3, mitochondrial precursor [Mus musculus]	65 kDa	113199775	NP_659181	Acsf3	ENSMUSG00000015016		6.8 kDa mitochondrial proteolipid [Mus musculus]	7 kDa	21312554	NP_081636	2010107E04Rik	ENSMUSG00000021290		hypothetical protein LOC67750 [Mus musculus]	34 kDa	109948267	NP_080635	4930578I06Rik	ENSMUSG00000021961		PREDICTED: hypothetical protein LOC380654 [Mus musculus]	314 kDa	94388538	XP_994223	4930485B16Rik	ENSMUSG00000020014
disintegrin and metalloproteinase domain-containing protein 10 precursor [Mus musculus]	84 kDa	150378458	NP_031425	Adam10	ENSMUSG00000054693		hypothetical protein LOC69478 [Mus musculus]	18 kDa	221139775	NP_081366	2300009A05Rik	ENSMUSG00000032403		hypothetical protein LOC74528 [Mus musculus]	38 kDa	21312780	NP_083260	8430406I07Rik	ENSMUSG00000027424		ras homolog gene family, member A [Mus musculus]	22 kDa	240120058	NP_001155245	4930544G11Rik	ENSMUSG00000036463
disintegrin and metalloproteinase domain-containing protein 28 isoform 4 [Mus musculus]	86 kDa	114326442	NP_001041640	Adam28	ENSMUSG00000014725		protein QIL1 [Mus musculus]	13 kDa	23346595	NP_694792	2410015M20Rik	ENSMUSG00000049760		hypothetical protein LOC217830 precursor [Mus musculus]	66 kDa	31981784	NP_663423	9030617O03Rik	ENSMUSG00000021185		hypothetical protein LOC67663 [Mus musculus]	19 kDa	13385796	NP_080576	4930549C01Rik	ENSMUSG00000036921
1-acyl-sn-glycerol-3-phosphate acyltransferase epsilon [Mus musculus]	42 kDa	27229077	NP_081068	Agpat5	ENSMUSG00000031467		hypothetical protein LOC66469 [Mus musculus]	22 kDa	27754130	NP_079858	2810405K02Rik	ENSMUSG00000029059		cystatin E2 [Mus musculus]	15 kDa	58037501	NP_084236	9230104L09Rik	ENSMUSG00000027446		acrosome formation-associated factor precursor [Mus musculus]	38 kDa	59709445	NP_081365	4930579C15Rik	ENSMUSG00000028575
anterior gradient protein 2 homolog precursor [Mus musculus]	20 kDa	6753010	NP_035913	Agr2	ENSMUSG00000020581		hypothetical protein LOC70821 [Mus musculus]	68 kDa	21389313	NP_081840	4921507P07Rik	ENSMUSG00000029828		PREDICTED: TPR repeat-containing protein C10orf93 [Mus musculus]	254 kDa	309266145	XP_924177	9330101J02Rik	ENSMUSG00000049571		hypothetical protein LOC70564 precursor [Mus musculus]	24 kDa	27229101	NP_081740	5730469M10Rik	ENSMUSG00000021792
adenylate kinase isoenzyme 1 [Mus musculus]	23 kDa	10946936	NP_067490	Ak1	ENSMUSG00000026817		hypothetical protein LOC70920 [Mus musculus]	29 kDa	46559372	NP_081879	4921511H03Rik	ENSMUSG00000040514		AP2 associated kinase 1 isoform 2 [Mus musculus]	95 kDa	73695877	NP_808430	Aak1	ENSMUSG00000057230		hypothetical protein LOC68115 precursor [Mus musculus]	33 kDa	145587094	NP_001074650	9430016H08Rik	ENSMUSG00000025971
aldehyde dehydrogenase 3 family, member B2 [Mus musculus]	53 kDa	294460012	NP_001170909	Aldh3b2	ENSMUSG00000075296		hypothetical protein LOC77058 [Mus musculus]	62 kDa	254675160	NP_084135	4921530D09Rik	ENSMUSG00000026940		alpha-aminoadipic semialdehyde synthase, mitochondrial precursor [Mus musculus]	103 kDa	31980703	NP_038958	Aass	ENSMUSG00000029695		hypothetical protein LOC241850 [Mus musculus]	53 kDa	34147236	NP_899004	Abhd16b	ENSMUSG00000055882
probable alpha-ketoglutarate-dependent dioxygenase ABH7 precursor [Mus musculus]	25 kDa	21313470	NP_079814	Alkbh7	ENSMUSG00000002661		hypothetical protein LOC73862 [Mus musculus]	17 kDa	268370283	NP_082945	4930415F15Rik	ENSMUSG00000020191		ATP-binding cassette sub-family A member 2 [Mus musculus]	271 kDa	110225379	NP_031405	Abca2	ENSMUSG00000026944		acyl-Coenzyme A dehydrogenase family, member 10-like [Mus musculus]	61 kDa	257467675	NP_848914	Acad12	ENSMUSG00000042647
alkaline phosphatase, tissue-nonspecific isozyme precursor [Mus musculus]	58 kDa	160333226	NP_031457	Alpl	ENSMUSG00000028766		PREDICTED: hypothetical protein LOC73863 [Mus musculus]	16 kDa	20903411	XP_128114	4930415O20Rik	ENSMUSG00000022993		ATP-binding cassette sub-family A member 3 [Mus musculus]	192 kDa	88759350	NP_038883	Abca3	ENSMUSG00000024130		actin-like protein 9 [Mus musculus]	46 kDa	85662421	NP_899105	Actl9	ENSMUSG00000092519
protein angel homolog 2 [Mus musculus]	62 kDa	70794813	NP_067396	Angel2	ENSMUSG00000026634		transmembrane protein C2orf18 homolog precursor [Mus musculus]	41 kDa	188497646	NP_783606	4930471M23Rik	ENSMUSG00000029175		ATP-binding cassette sub-family B member 10, mitochondrial precursor [Mus musculus]	77 kDa	9506367	NP_062425	Abcb10	ENSMUSG00000031974		actin-related protein T2 [Mus musculus]	42 kDa	13386316	NP_082789	Actrt2	ENSMUSG00000051276
anoctamin-10 [Mus musculus]	76 kDa	30794236	NP_598740	Ano10	ENSMUSG00000037949		hypothetical protein LOC67646 [Mus musculus]	26 kDa	21312856	NP_080567	4930522H14Rik	ENSMUSG00000060491		ATP-binding cassette sub-family B member 7, mitochondrial [Mus musculus]	83 kDa	169234938	NP_033722	Abcb7	ENSMUSG00000031333		disintegrin and metalloproteinase domain-containing protein 1b precursor [Mus musculus]	89 kDa	114842412	NP_742123	Adam1b	ENSMUSG00000062438
annexin A7 [Mus musculus]	50 kDa	160707956	NP_033804	Anxa7	ENSMUSG00000021814		hypothetical protein LOC67750 [Mus musculus]	34 kDa	109948267	NP_080635	4930578I06Rik	ENSMUSG00000021961		canalicular multispecific organic anion transporter 2 [Mus musculus]	169 kDa	90403595	NP_083876	Abcc3	ENSMUSG00000020865		a disintegrin and metallopeptidase domain 4 [Mus musculus]	84 kDa	27923590	NP_033750	Adam4	ENSMUSG00000072972
AP-2 complex subunit mu [Mus musculus]	50 kDa	6753074	NP_033809	Ap2m1	ENSMUSG00000022841		IQ and AAA domain-containing protein 1-like [Mus musculus]	96 kDa	282721066	NP_808344	4931409K22Rik	ENSMUSG00000038199		protein BAT5 [Mus musculus]	63 kDa	30519896	NP_848707	Abhd16a	ENSMUSG00000007036		a disintegrin and metalloproteinase domain 6-like [Mus musculus]	85 kDa	57222276	NP_001009545	Adam6b	ENSMUSG00000051804
apolipoprotein A-I preproprotein [Mus musculus]	31 kDa	160333304	NP_033822	Apoa1	ENSMUSG00000032083		hypothetical protein LOC238663 [Mus musculus]	137 kDa	140970505	NP_808379	4932411G14Rik	ENSMUSG00000043986		acetyl-CoA carboxylase 1 [Mus musculus]	265 kDa	125656173	NP_579938	Acaca	ENSMUSG00000020532		antizyme inhibitor 2 [Mus musculus]	50 kDa	27370330	NP_766463	Adc	ENSMUSG00000028789
ADP-ribosylation factor-related protein 1 isoform 1 [Mus musculus]	23 kDa	260763870	NP_083978	Arfrp1	ENSMUSG00000038671		hypothetical protein LOC242838 [Mus musculus]	97 kDa	161086957	NP_766467	4932412H11Rik	ENSMUSG00000040367		acetyl-CoA acetyltransferase, cytosolic [Mus musculus]	41 kDa	148747461	NP_033364	Acat2	ENSMUSG00000023832		adenylate kinase isoenzyme 1 [Mus musculus]	23 kDa	10946936	NP_067490	Ak1	ENSMUSG00000026817
rho GTPase-activating protein 1 isoform 2 [Mus musculus]	50 kDa	225543420	NP_666236	Arhgap1	ENSMUSG00000027247		hypothetical protein LOC238683 [Mus musculus]	95 kDa	253795511	NP_001077359	4932441B19Rik	ENSMUSG00000074849		acyl-CoA-binding domain-containing protein 5 isoform d [Mus musculus]	52 kDa	156255161	NP_001095906	Acbd5	ENSMUSG00000026781		A-kinase anchor protein 14 [Mus musculus]	58 kDa	85702101	NP_001028957	Akap14	ENSMUSG00000036551
armadillo repeat-containing X-linked protein 1 [Mus musculus]	51 kDa	21313420	NP_084342	Armcx1	ENSMUSG00000033460		hypothetical protein LOC328019 [Mus musculus]	37 kDa	29244338	NP_808469	4933400C05Rik	ENSMUSG00000044787		cytoplasmic aconitate hydratase [Mus musculus]	98 kDa	110347487	NP_031412	Aco1	ENSMUSG00000028405		PREDICTED: a-kinase anchor protein 4-like, partial [Mus musculus]	78 kDa	309266714	XP_003086838	Akap4	ENSMUSG00000050089
armadillo repeat-containing X-linked protein 3 [Mus musculus]	43 kDa	261862275	NP_082146	Armcx3	ENSMUSG00000049047		probable isocitrate dehydrogenase [NAD] gamma 2, mitochondrial [Mus musculus]	44 kDa	27370380	NP_766489	4933405O20Rik			acyl-coenzyme A thioesterase 6 [Mus musculus]	47 kDa	110626167	NP_766168	Acot6	ENSMUSG00000043487		Alstrom syndrome protein 1 homolog [Mus musculus]	360 kDa	153791438	NP_660258	Alms1	ENSMUSG00000063810
signal peptidase complex subunit 3 [Mus musculus]	20 kDa	21617845	NP_083817	Arxes2	ENSMUSG00000048040		hypothetical protein LOC74528 [Mus musculus]	38 kDa	21312780	NP_083260	8430406I07Rik	ENSMUSG00000027424		acyl-CoA synthetase family member 2, mitochondrial precursor [Mus musculus]	68 kDa	24418933	NP_722502	Acsf2	ENSMUSG00000076435		protein angel homolog 2 [Mus musculus]	62 kDa	70794813	NP_067396	Angel2	ENSMUSG00000026634
atlastin-2 isoform 1 [Mus musculus]	66 kDa	119372300	NP_062691	Atl2	ENSMUSG00000059811		hypothetical protein LOC217830 precursor [Mus musculus]	66 kDa	31981784	NP_663423	9030617O03Rik	ENSMUSG00000021185		long-chain-fatty-acid--CoA ligase 5 [Mus musculus]	76 kDa	58218988	NP_082252	Acsl5	ENSMUSG00000024981		ADP-ribosylation factor-like protein 3 [Mus musculus]	20 kDa	9789881	NP_062692	Arl3	ENSMUSG00000025035
probable cation-transporting ATPase 13A1 [Mus musculus]	132 kDa	283135194	NP_573487	Atp13a1	ENSMUSG00000031862		PREDICTED: TPR repeat-containing protein C10orf93 [Mus musculus]	254 kDa	309266145	XP_924177	9330101J02Rik	ENSMUSG00000049571		acetyl-coenzyme A synthetase 2-like, mitochondrial precursor [Mus musculus]	75 kDa	18034773	NP_542142	Acss1	ENSMUSG00000027452		actin-related protein M1 homolog [Mus musculus]	40 kDa	58037457	NP_083966	Arpm1	ENSMUSG00000037737
calcium-transporting ATPase type 2C member 1 [Mus musculus]	100 kDa	225690606	NP_778190	Atp2c1	ENSMUSG00000032570		AP2 associated kinase 1 isoform 2 [Mus musculus]	95 kDa	73695877	NP_808430	Aak1	ENSMUSG00000057230		acyl-CoA synthetase short-chain family member 3, mitochondrial isoform 1 [Mus musculus]	75 kDa	218563743	NP_001136276	Acss3	ENSMUSG00000035948		signal peptidase complex subunit 3 [Mus musculus]	20 kDa	21617845	NP_083817	Arxes2	ENSMUSG00000048040
V-type proton ATPase 116 kDa subunit a isoform 2 [Mus musculus]	98 kDa	83627707	NP_035726	Atp6v0a2	ENSMUSG00000038023		ATP-binding cassette sub-family A member 3 [Mus musculus]	192 kDa	88759350	NP_038883	Abca3	ENSMUSG00000024130		alpha-actinin-1 [Mus musculus]	103 kDa	61097906	NP_598917	Actn1	ENSMUSG00000015143		cDNA sequence BC048507 [Mus musculus]	10 kDa	47564127	NP_001001185	BC048507	ENSMUSG00000064063
probable phospholipid-transporting ATPase IIA [Mus musculus]	119 kDa	40795674	NP_056546	Atp9a	ENSMUSG00000027546		ATP-binding cassette, sub-family B (MDR/TAP), member 5 [Mus musculus]	137 kDa	209417402	NP_084237	Abcb5	ENSMUSG00000072791		actin-related protein 3 [Mus musculus]	47 kDa	23956222	NP_076224	Actr3	ENSMUSG00000026341		hypothetical protein LOC434439 [Mus musculus]	23 kDa	52138534	NP_001004192	BC048562	ENSMUSG00000050641
beta-1,3-galactosyltransferase 6 [Mus musculus]	37 kDa	17978260	NP_536693	B3galt6	ENSMUSG00000050796		canalicular multispecific organic anion transporter 2 [Mus musculus]	169 kDa	90403595	NP_083876	Abcc3	ENSMUSG00000020865		disintegrin and metalloproteinase domain-containing protein 32 [Mus musculus]	84 kDa	229332006	NP_700446	Adam32	ENSMUSG00000037437		transmembrane protein ENSP00000340100 homolog [Mus musculus]	41 kDa	29244306	NP_808453	BC049635	ENSMUSG00000050141
beta-1,4 N-acetylgalactosaminyltransferase 1 isoform 2 [Mus musculus]	59 kDa	189339268	NP_082015	B4galnt1	ENSMUSG00000006731		acetyl-CoA carboxylase 1 [Mus musculus]	265 kDa	125656173	NP_579938	Acaca	ENSMUSG00000020532		chaperone activity of bc1 complex-like, mitochondrial precursor [Mus musculus]	72 kDa	254028217	NP_001156762	Adck3	ENSMUSG00000026489		hypothetical protein LOC232972 [Mus musculus]	27 kDa	59933292	NP_954601	BC049730	ENSMUSG00000045587
beta-1,4 N-acetylgalactosaminyltransferase 2 [Mus musculus]	58 kDa	6679931	NP_032107	B4galnt2	ENSMUSG00000013418		acetyl-CoA acetyltransferase, cytosolic [Mus musculus]	41 kDa	148747461	NP_033364	Acat2	ENSMUSG00000023832		aarF domain containing kinase 4 [Mus musculus]	59 kDa	124244100	NP_598531	Adck4	ENSMUSG00000003762		bactericidal permeability-increasing protein [Mus musculus]	54 kDa	29244434	NP_808518	Bpi	ENSMUSG00000052922
beta-1,4-galactosyltransferase 1 [Mus musculus]	44 kDa	11602910	NP_071641	B4galt1	ENSMUSG00000028413		acyl-CoA-binding domain-containing protein 5 isoform d [Mus musculus]	52 kDa	156255161	NP_001095906	Acbd5	ENSMUSG00000026781		aarF domain containing kinase 5 [Mus musculus]	67 kDa	169234776	NP_766548	Adck5	ENSMUSG00000022550		BTB (POZ) domain containing 16 [Mus musculus]	60 kDa	238776835	NP_001074507	Btbd16	ENSMUSG00000040298
beta-1,4-galactosyltransferase 4 [Mus musculus]	40 kDa	188528672	NP_062778	B4galt4	ENSMUSG00000022793		cytoplasmic aconitate hydratase [Mus musculus]	98 kDa	110347487	NP_031412	Aco1	ENSMUSG00000028405		alcohol dehydrogenase class-3 [Mus musculus]	40 kDa	31982511	NP_031436	Adh5	ENSMUSG00000028138		hypothetical protein LOC223665 isoform 1 [Mus musculus]	24 kDa	21735489	NP_663447	C030006K11Rik	ENSMUSG00000079002
bactericidal permeability-increasing protein [Mus musculus]	54 kDa	29244434	NP_808518	Bpi	ENSMUSG00000052922		acyl-coenzyme A thioesterase 6 [Mus musculus]	47 kDa	110626167	NP_766168	Acot6	ENSMUSG00000043487		hydroxyacid-oxoacid transhydrogenase, mitochondrial precursor [Mus musculus]	50 kDa	30424876	NP_780445	Adhfe1	ENSMUSG00000025911		cation channel sperm-associated protein subunit gamma [Mus musculus]	131 kDa	157951745	NP_083990	Catsperg2	ENSMUSG00000049123
bovine seminal plasma protein homolog 1 precursor [Mus musculus]	16 kDa	85701923	NP_001028590	Bsph1	ENSMUSG00000074378		low molecular weight phosphotyrosine protein phosphatase isoform 2 [Mus musculus]	18 kDa	31542070	NP_067305	Acp1	ENSMUSG00000044573		2-aminoethanethiol dioxygenase [Mus musculus]	28 kDa	225703118	NP_001005419	Ado	ENSMUSG00000057134		coiled-coil domain-containing protein 114 [Mus musculus]	74 kDa	85701754	NP_001028415	Ccdc114	ENSMUSG00000040189
hypothetical protein LOC223665 isoform 1 [Mus musculus]	24 kDa	21735489	NP_663447	C030006K11Rik	ENSMUSG00000079002		long-chain-fatty-acid--CoA ligase ACSBG2 [Mus musculus]	74 kDa	84993736	NP_001034203	Acsbg2	ENSMUSG00000024207		1-acyl-sn-glycerol-3-phosphate acyltransferase alpha isoform 1 [Mus musculus]	32 kDa	254281341	NP_001156851	Agpat1	ENSMUSG00000034254		coiled-coil domain-containing protein 135 [Mus musculus]	103 kDa	154091013	NP_001036180	Ccdc135	ENSMUSG00000031786
glycoprotein-N-acetylgalactosamine 3-beta-galactosyltransferase 1 [Mus musculus]	42 kDa	282396086	NP_443719	C1galt1	ENSMUSG00000042460		long-chain-fatty-acid--CoA ligase 6 isoform 1 [Mus musculus]	81 kDa	75992911	NP_659072	Acsl6	ENSMUSG00000020333		alkyldihydroxyacetonephosphate synthase, peroxisomal precursor [Mus musculus]	74 kDa	295444834	NP_766254	Agps	ENSMUSG00000042410		hypothetical protein LOC381738 [Mus musculus]	89 kDa	85701985	NP_001028632	Ccdc164	ENSMUSG00000073102
C1GALT1-specific chaperone 1 [Mus musculus]	36 kDa	10946990	NP_067525	C1galt1c1	ENSMUSG00000048970		alpha-actinin-1 [Mus musculus]	103 kDa	61097906	NP_598917	Actn1	ENSMUSG00000015143		proteasome-associated protein ECM29 homolog [Mus musculus]	204 kDa	37718970	NP_759013	AI314180	ENSMUSG00000050812		coiled-coil domain-containing protein 81 [Mus musculus]	76 kDa	244790085	NP_001156451	Ccdc81	ENSMUSG00000039391
voltage-dependent calcium channel subunit alpha-2/delta-1 isoform a [Mus musculus]	125 kDa	161086896	NP_001104313	Cacna2d1	ENSMUSG00000040118		actin-related protein 3 [Mus musculus]	47 kDa	23956222	NP_076224	Actr3	ENSMUSG00000026341		adenylate kinase isoenzyme 4, mitochondrial [Mus musculus]	25 kDa	294862280	NP_001171073	Ak4	ENSMUSG00000028527		CD59B glycoprotein precursor [Mus musculus]	14 kDa	32469507	NP_862906	Cd59b	ENSMUSG00000068686
soluble calcium-activated nucleotidase 1 isoform 1 [Mus musculus]	46 kDa	71043951	NP_083778	Cant1	ENSMUSG00000025575		acylphosphatase-1 [Mus musculus]	11 kDa	13384810	NP_079697	Acyp1	ENSMUSG00000008822		alcohol dehydrogenase [NADP+] [Mus musculus]	37 kDa	10946870	NP_067448	Akr1a1	ENSMUSG00000028692		dual specificity protein phosphatase CDC14B isoform 1 [Mus musculus]	56 kDa	172072671	NP_766175	Cdc14b	ENSMUSG00000033102
protein CASC4 isoform 2 [Mus musculus]	40 kDa	158711675	NP_950239	Casc4	ENSMUSG00000060227		a disintegrin and metalloprotease domain 3 (cyritestin) [Mus musculus]	91 kDa	121949804	NP_033749	Adam3	ENSMUSG00000031553		CD166 antigen precursor [Mus musculus]	65 kDa	31791059	NP_033785	Alcam	ENSMUSG00000022636		chloride channel calcium activated 2 [Mus musculus]	100 kDa	13447394	NP_085104	Clca2	ENSMUSG00000028262
CAS1 domain-containing protein 1 precursor [Mus musculus]	92 kDa	37620157	NP_663373	Casd1	ENSMUSG00000015189		disintegrin and metalloproteinase domain-containing protein 32 [Mus musculus]	84 kDa	229332006	NP_700446	Adam32	ENSMUSG00000037437		alpha-1,3-mannosyltransferase ALG2 [Mus musculus]	47 kDa	172072657	NP_064382	Alg2	ENSMUSG00000039740		COP9 signalosome complex subunit 4 [Mus musculus]	46 kDa	6753490	NP_036131	Cops4	ENSMUSG00000035297
coiled-coil domain-containing protein 47 precursor [Mus musculus]	56 kDa	125628650	NP_080285	Ccdc47	ENSMUSG00000078622		disintegrin and metalloproteinase domain-containing protein 5 precursor [Mus musculus]	85 kDa	75677440	NP_031427	Adam5	ENSMUSG00000031554		dolichyl-phosphate beta-glucosyltransferase [Mus musculus]	37 kDa	21728372	NP_079718	Alg5	ENSMUSG00000036632		COP9 signalosome complex subunit 8 [Mus musculus]	23 kDa	114158691	NP_598566	Cops8	ENSMUSG00000034432
CD9 antigen [Mus musculus]	25 kDa	6680894	NP_031683	Cd9	ENSMUSG00000030342		aarF domain containing kinase 5 [Mus musculus]	67 kDa	169234776	NP_766548	Adck5	ENSMUSG00000022550		alpha-methylacyl-CoA racemase [Mus musculus]	42 kDa	46518506	NP_032563	Amacr	ENSMUSG00000022244		cysteine-rich secretory protein 2 precursor [Mus musculus]	28 kDa	6678423	NP_033446	Crisp2	ENSMUSG00000023930
claudin-4 [Mus musculus]	22 kDa	6753440	NP_034033	Cldn4	ENSMUSG00000047501		alcohol dehydrogenase class-3 [Mus musculus]	40 kDa	31982511	NP_031436	Adh5	ENSMUSG00000028138		ankyrin 3, epithelial isoform a [Mus musculus]	188 kDa	116256491	NP_733924	Ank3	ENSMUSG00000069601		cytochrome b5 domain-containing protein 1 [Mus musculus]	27 kDa	113865881	NP_001038990	Cyb5d1	ENSMUSG00000044795
clathrin light chain A isoform a [Mus musculus]	24 kDa	122939192	NP_001073853	Clta	ENSMUSG00000028478		AFG3-like protein 1 [Mus musculus]	87 kDa	66792806	NP_473411	Afg3l1	ENSMUSG00000031967		acidic leucine-rich nuclear phosphoprotein 32 family member B [Mus musculus]	31 kDa	18700032	NP_570959	Anp32b	ENSMUSG00000028333		dephospho-CoA kinase domain-containing protein [Mus musculus]	26 kDa	27754054	NP_080827	Dcakd	ENSMUSG00000020935
conserved oligomeric Golgi complex subunit 1 [Mus musculus]	109 kDa	159110754	NP_038609	Cog1	ENSMUSG00000018661		proteasome-associated protein ECM29 homolog [Mus musculus]	204 kDa	37718970	NP_759013	AI314180	ENSMUSG00000050812		annexin A4 [Mus musculus]	36 kDa	161016799	NP_038499	Anxa4	ENSMUSG00000029994		beta-defensin 2 precursor [Mus musculus]	8 kDa	6753624	NP_034160	Defb2	ENSMUSG00000006570
conserved oligomeric Golgi complex subunit 2 [Mus musculus]	82 kDa	256985208	NP_084022	Cog2	ENSMUSG00000031979		putative adenylate kinase-like protein C9orf98 homolog [Mus musculus]	55 kDa	152963553	NP_001029046	Ak8	ENSMUSG00000026807		annexin A5 [Mus musculus]	36 kDa	6753060	NP_033803	Anxa5	ENSMUSG00000027712		dnaJ homolog subfamily A member 4 [Mus musculus]	45 kDa	11496255	NP_067397	Dnaja4	ENSMUSG00000032285
conserved oligomeric Golgi complex subunit 3 [Mus musculus]	94 kDa	119392070	NP_796355	Cog3	ENSMUSG00000034893		PREDICTED: hypothetical protein LOC633979 [Mus musculus]	218 kDa	309262133	XP_003085720	Akd1	ENSMUSG00000091415		annexin A6 isoform b [Mus musculus]	75 kDa	158966670	NP_001103681	Anxa6	ENSMUSG00000018340		thymidylate kinase isoform 1 [Mus musculus]	24 kDa	157785665	NP_001099137	Dtymk	ENSMUSG00000026281
conserved oligomeric Golgi complex subunit 4 [Mus musculus]	89 kDa	19527194	NP_598734	Cog4	ENSMUSG00000031753		ankyrin 3, epithelial isoform a [Mus musculus]	188 kDa	116256491	NP_733924	Ank3	ENSMUSG00000069601		AP-1 complex subunit beta-1 [Mus musculus]	104 kDa	88853578	NP_031480	Ap1b1	ENSMUSG00000009090		dual specificity protein phosphatase 3 [Mus musculus]	20 kDa	21312314	NP_082483	Dusp3	ENSMUSG00000003518
conserved oligomeric Golgi complex subunit 6 [Mus musculus]	73 kDa	160333744	NP_080501	Cog6	ENSMUSG00000027742		ankyrin repeat domain-containing protein 5 [Mus musculus]	87 kDa	28316764	NP_783598	Ankrd5	ENSMUSG00000074771		AP-1 complex subunit gamma-1 [Mus musculus]	92 kDa	56744242	NP_033807	Ap1g1	ENSMUSG00000031731		EF-hand calcium-binding domain-containing protein 3 [Mus musculus]	50 kDa	124486666	NP_001074515	Efcab3	ENSMUSG00000020690
ubiquinone biosynthesis protein COQ4 homolog, mitochondrial precursor [Mus musculus]	30 kDa	30520093	NP_848808	Coq4	ENSMUSG00000026798		acidic leucine-rich nuclear phosphoprotein 32 family member B [Mus musculus]	31 kDa	18700032	NP_570959	Anp32b	ENSMUSG00000028333		AP-2 complex subunit alpha-1 isoform b [Mus musculus]	105 kDa	116256510	NP_001070732	Ap2a1	ENSMUSG00000060279		eukaryotic translation initiation factor 6 [Mus musculus]	27 kDa	27501448	NP_034709	Eif6	ENSMUSG00000027613
neighbor of COX4 [Mus musculus]	23 kDa	6754870	NP_035056	Cox4nb	ENSMUSG00000031819		aminopeptidase N [Mus musculus]	110 kDa	225637487	NP_032512	Anpep	ENSMUSG00000039062		AP-2 complex subunit alpha-2 [Mus musculus]	104 kDa	163644277	NP_031485	Ap2a2	ENSMUSG00000002957		fumarylacetoacetate hydrolase domain-containing protein 1 [Mus musculus]	25 kDa	12963697	NP_075969	Fahd1	ENSMUSG00000045316
carboxypeptidase D precursor [Mus musculus]	152 kDa	150378501	NP_031780	Cpd	ENSMUSG00000020841		anthrax toxin receptor-like precursor [Mus musculus]	70 kDa	120407060	NP_766396	Antxrl	ENSMUSG00000047441		AP-2 complex subunit beta isoform b [Mus musculus]	105 kDa	21313640	NP_082191	Ap2b1	ENSMUSG00000035152		hypothetical protein LOC70897 isoform 1 [Mus musculus]	50 kDa	253795495	NP_083345	Fam71d	ENSMUSG00000056987
coproporphyrinogen-III oxidase, mitochondrial precursor [Mus musculus]	50 kDa	161484660	NP_031783	Cpox	ENSMUSG00000022742		annexin A13 [Mus musculus]	36 kDa	23956196	NP_081487	Anxa13	ENSMUSG00000055114		apolipoprotein E precursor [Mus musculus]	36 kDa	163644329	NP_033826	Apoe	ENSMUSG00000002985		fibronectin type 3 and ankyrin repeat domains 1 protein [Mus musculus]	38 kDa	13385328	NP_080126	Fank1	ENSMUSG00000053111
lysosomal protective protein isoform b [Mus musculus]	54 kDa	84042523	NP_001033581	Ctsa	ENSMUSG00000017760		annexin A6 isoform b [Mus musculus]	75 kDa	158966670	NP_001103681	Anxa6	ENSMUSG00000018340		coatomer subunit delta [Mus musculus]	57 kDa	148747410	NP_666097	Arcn1	ENSMUSG00000032096		fructose-1,6-bisphosphatase 1 [Mus musculus]	37 kDa	9506589	NP_062268	Fbp1	ENSMUSG00000069805
cathepsin S preproprotein [Mus musculus]	38 kDa	160707996	NP_067256	Ctss	ENSMUSG00000038642		AP-1 complex subunit beta-1 [Mus musculus]	104 kDa	88853578	NP_031480	Ap1b1	ENSMUSG00000009090		ADP-ribosylation factor 4 [Mus musculus]	20 kDa	6680720	NP_031505	Arf4	ENSMUSG00000021877		FAD synthase [Mus musculus]	55 kDa	89337262	NP_796015	Flad1	ENSMUSG00000042642
hypothetical protein LOC28106 precursor [Mus musculus]	18 kDa	18250288	NP_543027	D17Wsu104e	ENSMUSG00000019579		AP-2 complex subunit alpha-1 isoform b [Mus musculus]	105 kDa	116256510	NP_001070732	Ap2a1	ENSMUSG00000060279		rho GDP-dissociation inhibitor 1 [Mus musculus]	23 kDa	31982030	NP_598557	Arhgdia	ENSMUSG00000025132		filaggrin-2 [Mus musculus]	251 kDa	84370015	NP_001013826	Flg2	ENSMUSG00000049133
dephospho-CoA kinase domain-containing protein [Mus musculus]	26 kDa	27754054	NP_080827	Dcakd	ENSMUSG00000020935		AP-2 complex subunit sigma [Mus musculus]	17 kDa	161086984	NP_941015	Ap2s1	ENSMUSG00000008036		ADP-ribosylation factor-like protein 1 [Mus musculus]	20 kDa	153792526	NP_080135	Arl1	ENSMUSG00000060904		ferritin, mitochondrial precursor [Mus musculus]	27 kDa	247270151	NP_080562	Ftmt	ENSMUSG00000024510
D-aspartate oxidase [Mus musculus]	38 kDa	22267472	NP_081718	Ddo	ENSMUSG00000063428		apolipoprotein E precursor [Mus musculus]	36 kDa	163644329	NP_033826	Apoe	ENSMUSG00000002985		ADP-ribosylation factor-like protein 2 [Mus musculus]	21 kDa	31980988	NP_062696	Arl2	ENSMUSG00000024944		growth arrest-specific protein 8 [Mus musculus]	56 kDa	126157525	NP_061343	Gas8	ENSMUSG00000040220
beta-defensin 47 [Mus musculus]	9 kDa	84993780	NP_001034214	Defb47	ENSMUSG00000075573		adenine phosphoribosyltransferase [Mus musculus]	20 kDa	118601013	NP_033828	Aprt	ENSMUSG00000006589		ADP-ribosylation factor-like protein 8A [Mus musculus]	21 kDa	23956194	NP_081099	Arl8a	ENSMUSG00000026426		gamma-glutamyltransferase 7 [Mus musculus]	70 kDa	224994186	NP_659035	Ggt7	ENSMUSG00000027603
putative pre-mRNA-splicing factor ATP-dependent RNA helicase DHX15 isoform 2 [Mus musculus]	91 kDa	110835723	NP_031865	Dhx15	ENSMUSG00000029169		ADP-ribosylation factor guanine nucleotide-exchange factor 2 (brefeldin A-inhibited) [Mus musculus]	202 kDa	148229140	NP_001078964	Arfgef2	ENSMUSG00000074582		armadillo repeat-containing protein 1 [Mus musculus]	31 kDa	21312676	NP_083116	Armc1	ENSMUSG00000027599		growth hormone-inducible transmembrane protein [Mus musculus]	37 kDa	17505218	NP_510963	Ghitm	ENSMUSG00000041028
thymidylate kinase isoform 1 [Mus musculus]	24 kDa	157785665	NP_001099137	Dtymk	ENSMUSG00000026281		ADP-ribosylation factor-like protein 6 [Mus musculus]	21 kDa	188528681	NP_062639	Arl6	ENSMUSG00000022722		actin-related protein 2/3 complex subunit 4 isoform 1 [Mus musculus]	20 kDa	13386054	NP_080828	Arpc4	ENSMUSG00000079426		glycolipid transfer protein domain-containing protein 1 [Mus musculus]	25 kDa	31560025	NP_077792	Gltpd1	ENSMUSG00000029073
hypothetical protein LOC69123 [Mus musculus]	35 kDa	21312210	NP_081223	Eci3	ENSMUSG00000021416		ADP-ribosylation factor-like protein 8A [Mus musculus]	21 kDa	23956194	NP_081099	Arl8a	ENSMUSG00000026426		actin-related protein 2/3 complex subunit 5-like protein [Mus musculus]	17 kDa	21312654	NP_083085	Arpc5l	ENSMUSG00000026755		hypothetical protein LOC214568 [Mus musculus]	39 kDa	85701762	NP_001028427	Gm136	ENSMUSG00000071015
protein EFR3 homolog A [Mus musculus]	93 kDa	54020730	NP_598527	Efr3a	ENSMUSG00000015002		armadillo repeat-containing protein 1 [Mus musculus]	31 kDa	21312676	NP_083116	Armc1	ENSMUSG00000027599		armadillo repeat protein deleted in velo-cardio-facial syndrome homolog [Mus musculus]	105 kDa	40254129	NP_258435	Arvcf	ENSMUSG00000000325		hypothetical protein LOC381544 isoform 1 [Mus musculus]	49 kDa	224500887	NP_001139109	Gm1661	ENSMUSG00000060268
ectonucleoside triphosphate diphosphohydrolase 4 [Mus musculus]	70 kDa	18093090	NP_080450	Entpd4	ENSMUSG00000022066		armadillo repeat-containing protein 3 [Mus musculus]	97 kDa	124487327	NP_001074552	Armc3	ENSMUSG00000037683		aspartyl/asparaginyl beta-hydroxylase isoform 1 [Mus musculus]	83 kDa	125628659	NP_075553	Asph	ENSMUSG00000028207		PREDICTED: hypothetical protein LOC675747 [Mus musculus]	17 kDa	309266897	XP_989934	Gm17759
ectonucleoside triphosphate diphosphohydrolase 5 isoform a [Mus musculus]	50 kDa	71061460	NP_031673	Entpd5	ENSMUSG00000021236		armadillo repeat-containing protein 4 [Mus musculus]	115 kDa	124487093	NP_001074862	Armc4	ENSMUSG00000061802		ATPase family AAA domain-containing protein 1 [Mus musculus]	41 kDa	31560168	NP_080763	Atad1	ENSMUSG00000013662		hypothetical protein LOC241112 [Mus musculus]	57 kDa	85701842	NP_001028517	Gm216	ENSMUSG00000073650
epiplakin [Mus musculus]	725 kDa	37537522	NP_659097	Eppk1			actin-related protein 2/3 complex subunit 4 isoform 1 [Mus musculus]	20 kDa	13386054	NP_080828	Arpc4	ENSMUSG00000079426		ATPase family AAA domain-containing protein 3 [Mus musculus]	67 kDa	239985513	NP_849534	Atad3a	ENSMUSG00000029036		Tes-like protein [Mus musculus]	47 kDa	189230088	NP_001030036	Gm4907	ENSMUSG00000068113
ERO1-like protein beta precursor [Mus musculus]	54 kDa	38348230	NP_080460	Ero1lb	ENSMUSG00000057069		actin-related protein 2/3 complex subunit 5-like protein [Mus musculus]	17 kDa	21312654	NP_083085	Arpc5l	ENSMUSG00000026755		atlastin-3 isoform 1 [Mus musculus]	60 kDa	254826716	NP_001156977	Atl3	ENSMUSG00000024759		probable protein kinase-like protein SgK071 homolog [Mus musculus]	75 kDa	76781472	NP_941030	Gm711	ENSMUSG00000049897
extended synaptotagmin-2 [Mus musculus]	94 kDa	67782360	NP_083007	Esyt2	ENSMUSG00000021171		armadillo repeat protein deleted in velo-cardio-facial syndrome homolog [Mus musculus]	105 kDa	40254129	NP_258435	Arvcf	ENSMUSG00000000325		probable phospholipid-transporting ATPase IH [Mus musculus]	136 kDa	7656914	NP_056619	Atp11a	ENSMUSG00000031441		PREDICTED: hypothetical protein LOC667503 [Mus musculus]	125 kDa	309262854	XP_998931	Gm8672
exostosin-like 2 isoform a [Mus musculus]	37 kDa	254553481	NP_067363	Extl2	ENSMUSG00000027963		ankyrin repeat and SOCS box protein 9 [Mus musculus]	32 kDa	21311897	NP_081303	Asb9	ENSMUSG00000031384		sodium/potassium-transporting ATPase subunit beta-1 [Mus musculus]	35 kDa	6753138	NP_033851	Atp1b1	ENSMUSG00000026576		PREDICTED: hypothetical protein LOC380653 [Mus musculus]	38 kDa	83027669	XP_354560	Gm872	ENSMUSG00000020014
fumarylacetoacetate hydrolase domain-containing protein 1 [Mus musculus]	25 kDa	12963697	NP_075969	Fahd1	ENSMUSG00000045316		probable phospholipid-transporting ATPase IH [Mus musculus]	136 kDa	7656914	NP_056619	Atp11a	ENSMUSG00000031441		plasma membrane calcium ATPase 1 [Mus musculus]	135 kDa	62234487	NP_080758	Atp2b1	ENSMUSG00000019943		transmembrane glycoprotein NMB precursor [Mus musculus]	64 kDa	171846253	NP_444340	Gpnmb	ENSMUSG00000029816
hypothetical protein LOC100101807 [Mus musculus]	24 kDa	153945763	NP_001093586	Fam177a	ENSMUSG00000073083		probable cation-transporting ATPase 13A4 isoform 1 [Mus musculus]	133 kDa	257196273	NP_001158084	Atp13a4	ENSMUSG00000038094		plasma membrane calcium ATPase 3 [Mus musculus]	134 kDa	56699478	NP_796210	Atp2b3	ENSMUSG00000031376		glutathione peroxidase 1 [Mus musculus]	22 kDa	84871986	NP_032186	Gpx1	ENSMUSG00000063856
PREDICTED: protein FAM18B-like [Mus musculus]	30 kDa	149262150	XP_001474238	Fam18b	ENSMUSG00000014177		plasma membrane calcium ATPase 3 [Mus musculus]	134 kDa	56699478	NP_796210	Atp2b3	ENSMUSG00000031376		ATP synthase-coupling factor 6, mitochondrial precursor [Mus musculus]	12 kDa	7949005	NP_058035	Atp5j	ENSMUSG00000022890		glutathione S-transferase Mu 1 [Mus musculus]	26 kDa	6754084	NP_034488	Gstm1	ENSMUSG00000058135
hypothetical protein LOC78252 [Mus musculus]	64 kDa	160333214	NP_084345	Fam55b	ENSMUSG00000032028		V-type proton ATPase 16 kDa proteolipid subunit [Mus musculus]	16 kDa	6753144	NP_033859	Atp6v0c	ENSMUSG00000024121		V-type proton ATPase 116 kDa subunit a isoform 1 [Mus musculus]	96 kDa	12025532	NP_058616	Atp6v0a1	ENSMUSG00000019302		glutathione S-transferase Mu 2 [Mus musculus]	26 kDa	6680121	NP_032209	Gstm2	ENSMUSG00000040562
regulator of microtubule dynamics protein 3 [Mus musculus]	52 kDa	85701644	NP_001028308	Fam82a2	ENSMUSG00000070730		large proline-rich protein BAT3 [Mus musculus]	121 kDa	33147082	NP_476512	Bag6	ENSMUSG00000024392		V-type proton ATPase 16 kDa proteolipid subunit [Mus musculus]	16 kDa	6753144	NP_033859	Atp6v0c	ENSMUSG00000024121		glutathione S-transferase theta-2 [Mus musculus]	28 kDa	158081796	NP_034491	Gstt2	ENSMUSG00000033318
fatty acyl-CoA reductase 1 [Mus musculus]	59 kDa	68448551	NP_081655	Far1	ENSMUSG00000030759		hypothetical protein LOC434285 [Mus musculus]	40 kDa	56090513	NP_001007592	BB014433	ENSMUSG00000049008		V-type proton ATPase subunit d 2 [Mus musculus]	40 kDa	225543207	NP_780615	Atp6v0d2	ENSMUSG00000028238		glutathione S-transferase theta-4 [Mus musculus]	28 kDa	294610650	NP_083748	Gstt4	ENSMUSG00000009093
phenylalanyl-tRNA synthetase, mitochondrial isoform 1 [Mus musculus]	52 kDa	22267456	NP_077236	Fars2	ENSMUSG00000021420		hypothetical protein LOC407788 isoform 2 [Mus musculus]	32 kDa	255522841	NP_001157327	BC051142	ENSMUSG00000057246		V-type proton ATPase subunit D [Mus musculus]	28 kDa	12963799	NP_076210	Atp6v1d	ENSMUSG00000021114		maleylacetoacetate isomerase [Mus musculus]	24 kDa	6754092	NP_034493	Gstz1	ENSMUSG00000021033
phenylalanyl-tRNA synthetase beta chain [Mus musculus]	66 kDa	31981400	NP_035941	Farsb	ENSMUSG00000026245		hypothetical protein LOC381350 [Mus musculus]	55 kDa	110625692	NP_001001334	BC061194	ENSMUSG00000037708		V-type proton ATPase subunit E 1 [Mus musculus]	26 kDa	45504359	NP_031536	Atp6v1e1	ENSMUSG00000019210		haloacid dehalogenase-like hydrolase domain-containing protein 1 [Mus musculus]	26 kDa	165972327	NP_080384	Hdhd1a	ENSMUSG00000048875
NADPH:adrenodoxin oxidoreductase, mitochondrial precursor [Mus musculus]	54 kDa	6679767	NP_032023	Fdxr	ENSMUSG00000018861		biogenesis of lysosome-related organelles complex 1 subunit 1 [Mus musculus]	14 kDa	31980697	NP_056555	Bloc1s1	ENSMUSG00000090247		V-type proton ATPase subunit G 1 [Mus musculus]	14 kDa	15617197	NP_077135	Atp6v1g1	ENSMUSG00000039105		HEAT repeat containing 7A isoform 1 [Mus musculus]	182 kDa	283046757	NP_780666	Heatr7a	ENSMUSG00000022558
fukutin-related protein [Mus musculus]	55 kDa	27734120	NP_775606	Fkrp	ENSMUSG00000048920		bolA-like protein 1 [Mus musculus]	14 kDa	58037151	NP_081251	Bola1	ENSMUSG00000015943		copper-transporting ATPase 1 isoform 2 [Mus musculus]	162 kDa	157951680	NP_033856	Atp7a	ENSMUSG00000033792		hypothetical protein LOC381538 [Mus musculus]	142 kDa	187608579	NP_001119959	Heatr8	ENSMUSG00000047502
filaggrin-2 [Mus musculus]	251 kDa	84370015	NP_001013826	Flg2	ENSMUSG00000049133		calcium-binding tyrosine phosphorylation-regulated protein isoform a [Mus musculus]	48 kDa	109255220	NP_001035883	Cabyr	ENSMUSG00000024430		ATP synthase mitochondrial F1 complex assembly factor 2 [Mus musculus]	34 kDa	238776839	NP_663402	Atpaf2	ENSMUSG00000042709		histone H1.5 [Mus musculus]	23 kDa	21426893	NP_064418	Hist1h1b	ENSMUSG00000058773
flotillin-1 [Mus musculus]	48 kDa	6679809	NP_032053	Flot1	ENSMUSG00000059714		calmodulin [Mus musculus]	17 kDa	6680832	NP_031615	Calm3	ENSMUSG00000019370		methylglutaconyl-CoA hydratase, mitochondrial precursor [Mus musculus]	33 kDa	116268115	NP_057918	Auh	ENSMUSG00000021460		histone H1.4 [Mus musculus]	22 kDa	13430890	NP_056602	Hist1h1e	ENSMUSG00000051627
flotillin-2 isoform 2 [Mus musculus]	42 kDa	6679811	NP_032054	Flot2	ENSMUSG00000061981		cullin-associated NEDD8-dissociated protein 1 [Mus musculus]	136 kDa	189409138	NP_082270	Cand1	ENSMUSG00000020114		galactosylgalactosylxylosylprotein 3-beta-glucuronosyltransferase 3 [Mus musculus]	37 kDa	13195672	NP_077218	B3gat3	ENSMUSG00000071649		iron-sulfur cluster co-chaperone protein HscB, mitochondrial precursor [Mus musculus]	27 kDa	225703114	NP_705799	Hscb	ENSMUSG00000043510
folylpolyglutamate synthase, mitochondrial precursor [Mus musculus]	65 kDa	172088163	NP_034366	Fpgs	ENSMUSG00000009566		adenylyl cyclase-associated protein 1 [Mus musculus]	52 kDa	157951604	NP_031624	Cap1	ENSMUSG00000028656		apoptosis regulator BAX [Mus musculus]	21 kDa	6680770	NP_031553	Bax	ENSMUSG00000003873		oxidoreductase HTATIP2 isoform a [Mus musculus]	30 kDa	225690589	NP_058561	Htatip2	ENSMUSG00000039745
galactoside 2-alpha-L-fucosyltransferase 1 [Mus musculus]	42 kDa	49355810	NP_032077	Fut1	ENSMUSG00000008461		F-actin-capping protein subunit alpha-1 [Mus musculus]	33 kDa	161086971	NP_033927	Capza1	ENSMUSG00000070372		hypothetical protein LOC217370 [Mus musculus]	21 kDa	21450219	NP_659081	BC017643	ENSMUSG00000039294		serine protease HTRA1 precursor [Mus musculus]	51 kDa	229093139	NP_062510	Htra1	ENSMUSG00000006205
alpha-(1,3)-fucosyltransferase [Mus musculus]	49 kDa	6753920	NP_034372	Fut4	ENSMUSG00000049307		carbonic anhydrase 2 [Mus musculus]	29 kDa	157951596	NP_033931	Car2	ENSMUSG00000027562		quinone oxidoreductase-like protein 2 [Mus musculus]	38 kDa	85701628	NP_001028456	BC026585	ENSMUSG00000033488		isopentenyl-diphosphate Delta-isomerase 1 [Mus musculus]	32 kDa	281604088	NP_663335	Idi1	ENSMUSG00000058258
alpha-(1,6)-fucosyltransferase [Mus musculus]	67 kDa	31560444	NP_058589	Fut8	ENSMUSG00000021065		carbonic anhydrase 4 precursor [Mus musculus]	34 kDa	6671678	NP_031633	Car4	ENSMUSG00000000805		hypothetical protein LOC407788 isoform 2 [Mus musculus]	32 kDa	255522841	NP_001157327	BC051142	ENSMUSG00000057246		L-amino-acid oxidase precursor [Mus musculus]	70 kDa	254553434	NP_034345	Il4i1	ENSMUSG00000074141
galactose-3-O-sulfotransferase 4 [Mus musculus]	54 kDa	84370027	NP_001028588	Gal3st4	ENSMUSG00000075593		probable cysteinyl-tRNA synthetase, mitochondrial [Mus musculus]	61 kDa	189409152	NP_077210	Cars2	ENSMUSG00000056228		branched-chain-amino-acid aminotransferase, mitochondrial precursor [Mus musculus]	44 kDa	33859514	NP_033867	Bcat2	ENSMUSG00000030826		IQ domain-containing protein D [Mus musculus]	53 kDa	21313054	NP_083684	Iqcd	ENSMUSG00000029601
polypeptide N-acetylgalactosaminyltransferase 10 [Mus musculus]	69 kDa	46877107	NP_598950	Galnt10	ENSMUSG00000020520		cation channel sperm-associated protein subunit beta [Mus musculus]	126 kDa	257900479	NP_766611	Catsperb	ENSMUSG00000047014		2-oxoisovalerate dehydrogenase subunit beta, mitochondrial [Mus musculus]	36 kDa	40353220	NP_954665	Bckdhb	ENSMUSG00000032263		inositol 1,4,5-triphosphate receptor-interacting protein-like 1 precursor [Mus musculus]	62 kDa	254587912	NP_001156999	Itpripl1	ENSMUSG00000074825
polypeptide N-acetylgalactosaminyltransferase 14 [Mus musculus]	64 kDa	254910954	NP_082140	Galnt14	ENSMUSG00000024064		carbonyl reductase 3 [Mus musculus]	31 kDa	27413160	NP_766635	Cbr3	ENSMUSG00000022947		[3-methyl-2-oxobutanoate dehydrogenase [lipoamide]] kinase, mitochondrial precursor [Mus musculus]	47 kDa	6753164	NP_033869	Bckdk	ENSMUSG00000030802		izumo sperm-egg fusion protein 2 [Mus musculus]	22 kDa	251823722	NP_083593	Izumo2	ENSMUSG00000066500
polypeptide N-acetylgalactosaminyltransferase 4 [Mus musculus]	67 kDa	7657112	NP_056552	Galnt4	ENSMUSG00000090035		coiled-coil domain-containing protein 108 [Mus musculus]	209 kDa	87162476	NP_001034584	Ccdc108	ENSMUSG00000047021		biogenesis of lysosome-related organelles complex 1 subunit 1 [Mus musculus]	14 kDa	31980697	NP_056555	Bloc1s1	ENSMUSG00000090247		IZUMO family member 4 [Mus musculus]	26 kDa	89886473	NP_082105	Izumo4	ENSMUSG00000055862
glycine amidinotransferase, mitochondrial precursor [Mus musculus]	48 kDa	13385454	NP_080237	Gatm	ENSMUSG00000027199		coiled-coil domain-containing protein 11 [Mus musculus]	62 kDa	261862311	NP_083224	Ccdc11	ENSMUSG00000035394		bolA-like protein 1 [Mus musculus]	14 kDa	58037151	NP_081251	Bola1	ENSMUSG00000015943		kelch-like protein 10 [Mus musculus]	69 kDa	13385188	NP_080003	Klhl10	ENSMUSG00000001558
Golgi-specific brefeldin A-resistance guanine nucleotide exchange factor 1 [Mus musculus]	207 kDa	52138536	NP_849261	Gbf1	ENSMUSG00000025224		coiled-coil domain-containing protein 127 isoform 1 [Mus musculus]	31 kDa	13195630	NP_077163	Ccdc127	ENSMUSG00000021578		bolA-like protein 3 [Mus musculus]	12 kDa	30424938	NP_780486	Bola3	ENSMUSG00000045160		keratin, type II cytoskeletal 79 [Mus musculus]	58 kDa	22164776	NP_666175	Krt79	ENSMUSG00000061397
glucosaminyl transferase 4, core 2 [Mus musculus]	53 kDa	260593704	NP_001159537	Gcnt4	ENSMUSG00000091387		coiled-coil domain containing 146 [Mus musculus]	115 kDa	261245029	NP_083471	Ccdc146	ENSMUSG00000064280		carbamoyl-phosphate synthetase 2, aspartate transcarbamylase, and dihydroorotase [Mus musculus]	243 kDa	51093867	NP_076014	Cad	ENSMUSG00000013629		keratin, type II cuticular Hb5 [Mus musculus]	56 kDa	31980832	NP_058575	Krt85
gap junction alpha-1 protein [Mus musculus]	43 kDa	6753992	NP_034418	Gja1	ENSMUSG00000050953		coiled-coil domain containing 147 [Mus musculus]	104 kDa	253795525	NP_001156739	Ccdc147	ENSMUSG00000046585		calumenin isoform 2 [Mus musculus]	37 kDa	41282022	NP_908942	Calu	ENSMUSG00000029767		lanC-like protein 2 [Mus musculus]	51 kDa	19526936	NP_598498	Lancl2	ENSMUSG00000062190
D-glucuronyl C5-epimerase [Mus musculus]	70 kDa	65301488	NP_201577	Glce	ENSMUSG00000032252		nasopharyngeal epithelium specific protein 1 [Mus musculus]	66 kDa	254675124	NP_082248	Ccdc19	ENSMUSG00000026546		adenylyl cyclase-associated protein 1 [Mus musculus]	52 kDa	157951604	NP_031624	Cap1	ENSMUSG00000028656		plastin-2 [Mus musculus]	70 kDa	31543113	NP_032905	Lcp1	ENSMUSG00000021998
glycosyltransferase 8 domain-containing protein 1 [Mus musculus]	42 kDa	260763885	NP_083902	Glt8d1	ENSMUSG00000021916		coiled-coil domain-containing protein 39 [Mus musculus]	110 kDa	21312922	NP_080498	Ccdc39	ENSMUSG00000027676		F-actin-capping protein subunit alpha-1 [Mus musculus]	33 kDa	161086971	NP_033927	Capza1	ENSMUSG00000070372		LETM1 domain-containing protein LETM2, mitochondrial precursor [Mus musculus]	54 kDa	165905627	NP_766600	Letm2	ENSMUSG00000037363
beta-galactosidase-like protein [Mus musculus]	73 kDa	294610675	NP_001170980	Gm1110	ENSMUSG00000079644		coiled-coil domain-containing protein 40 [Mus musculus]	137 kDa	30425148	NP_780639	Ccdc40	ENSMUSG00000039963		F-actin-capping protein subunit alpha-2 [Mus musculus]	33 kDa	6671672	NP_031630	Capza2	ENSMUSG00000015733		endothelial lipase precursor [Mus musculus]	57 kDa	188219561	NP_034850	Lipg	ENSMUSG00000053846
PREDICTED: 60S ribosomal protein L21-like [Mus musculus]	19 kDa	149249111	XP_001476570	Gm13370			coiled-coil domain-containing protein 42A [Mus musculus]	38 kDa	164519120	NP_808447	Ccdc42	ENSMUSG00000045915		carbonic anhydrase 2 [Mus musculus]	29 kDa	157951596	NP_033931	Car2	ENSMUSG00000027562		putative lipoyltransferase 2, mitochondrial precursor [Mus musculus]	25 kDa	229577004	NP_080286	Lipt2	ENSMUSG00000030725
hypothetical protein LOC381667 [Mus musculus]	14 kDa	85701975	NP_001028631	Gm1679	ENSMUSG00000072754		coiled-coil domain-containing protein 63 [Mus musculus]	68 kDa	34303985	NP_899130	Ccdc63	ENSMUSG00000043036		carbonic anhydrase 5B, mitochondrial precursor [Mus musculus]	37 kDa	211057396	NP_851832	Car5b	ENSMUSG00000031373		PREDICTED: transcription elongation factor B polypeptide 1-like [Mus musculus]	12 kDa	149249090	XP_001475387	LOC100045866
prostate and testis expressed E [Mus musculus]	13 kDa	264681530	NP_001161145	Gm17727	ENSMUSG00000090738		T-complex protein 1 subunit gamma [Mus musculus]	61 kDa	6753320	NP_033966	Cct3	ENSMUSG00000001416		probable cysteinyl-tRNA synthetase, mitochondrial [Mus musculus]	61 kDa	189409152	NP_077210	Cars2	ENSMUSG00000056228		leucine-rich repeat-containing protein 34 [Mus musculus]	47 kDa	110625843	NP_082217	Lrrc34	ENSMUSG00000027702
PREDICTED: interferon-induced very large GTPase 1-like isoform 1 [Mus musculus]	281 kDa	149257690	XP_001478548	Gm4070	ENSMUSG00000078606		T-complex protein 1 subunit delta [Mus musculus]	58 kDa	6753322	NP_033967	Cct4	ENSMUSG00000007739		caveolin-1 [Mus musculus]	21 kDa	6680854	NP_031642	Cav1	ENSMUSG00000007655		leucine-rich repeat-containing protein 57 isoform b [Mus musculus]	29 kDa	227430395	NP_001153081	Lrrc57	ENSMUSG00000027286
transmembrane protein C5orf28 homolog [Mus musculus]	27 kDa	295054228	NP_001034333	Gm7120	ENSMUSG00000074634		T-complex protein 1 subunit eta [Mus musculus]	60 kDa	238814391	NP_031664	Cct7	ENSMUSG00000030007		carbonyl reductase 3 [Mus musculus]	31 kDa	27413160	NP_766635	Cbr3	ENSMUSG00000022947		lymphocyte antigen 6A-2/6E-1 precursor [Mus musculus]	14 kDa	6754580	NP_034868	Ly6a	ENSMUSG00000075602
guanine nucleotide-binding protein subunit alpha-13 [Mus musculus]	44 kDa	89001109	NP_034433	Gna13	ENSMUSG00000020611		T-complex protein 1 subunit theta [Mus musculus]	60 kDa	126723461	NP_033970	Cct8	ENSMUSG00000025613		coiled-coil domain-containing protein 109A [Mus musculus]	40 kDa	168823441	NP_001028431	Ccdc109a	ENSMUSG00000009647		lymphocyte antigen 6K precursor [Mus musculus]	17 kDa	54144477	NP_083903	Ly6k	ENSMUSG00000044678
guanine nucleotide-binding protein G(k) subunit alpha [Mus musculus]	41 kDa	33563256	NP_034436	Gnai3	ENSMUSG00000000001		chaperonin containing TCP1, subunit 8 (theta)-like 1 [Mus musculus]	61 kDa	38348482	NP_941023	Cct8l1	ENSMUSG00000038044		coiled-coil domain-containing protein 127 isoform 1 [Mus musculus]	31 kDa	13195630	NP_077163	Ccdc127	ENSMUSG00000021578		acyl-protein thioesterase 1 [Mus musculus]	25 kDa	6678760	NP_032892	Lypla1	ENSMUSG00000025903
protein ALEX isoform f [Mus musculus]	120 kDa	117959921	NP_001070975	Gnas	ENSMUSG00000027523		membrane cofactor protein precursor [Mus musculus]	41 kDa	6754660	NP_034908	Cd46	ENSMUSG00000016493		coiled-coil domain-containing protein 51 [Mus musculus]	45 kDa	258679490	NP_079965	Ccdc51	ENSMUSG00000025645		midkine precursor [Mus musculus]	15 kDa	59894788	NP_001012336	Mdk	ENSMUSG00000027239
Golgin subfamily A member 2 isoform b [Mus musculus]	113 kDa	124378030	NP_001074437	Golga2	ENSMUSG00000002546		complement decay-accelerating factor, GPI-anchored precursor [Mus musculus]	43 kDa	114326522	NP_034146	Cd55	ENSMUSG00000026399		T-complex protein 1 subunit theta [Mus musculus]	60 kDa	126723461	NP_033970	Cct8	ENSMUSG00000025613		NADP-dependent malic enzyme isoform 1 [Mus musculus]	64 kDa	162139827	NP_032641	Me1	ENSMUSG00000032418
Golgin subfamily A member 4 [Mus musculus]	258 kDa	20127150	NP_061218	Golga4	ENSMUSG00000038708		centromere protein V [Mus musculus]	28 kDa	225703070	NP_082724	Cenpv	ENSMUSG00000018509		leukocyte surface antigen CD47 [Mus musculus]	35 kDa	6754382	NP_034711	Cd47	ENSMUSG00000055447		meiosis-specific nuclear structural protein 1 [Mus musculus]	60 kDa	6678908	NP_032639	Mns1	ENSMUSG00000032221
Golgin subfamily A member 7 [Mus musculus]	16 kDa	109809743	NP_065610	Golga7	ENSMUSG00000015341		carboxylesterase 3 precursor [Mus musculus]	62 kDa	117553604	NP_444430	Ces1d	ENSMUSG00000056973		liver carboxylesterase 22 precursor [Mus musculus]	62 kDa	19526804	NP_598421	Ces1e	ENSMUSG00000061959		MORN repeat-containing protein 3 [Mus musculus]	28 kDa	110626066	NP_083388	Morn3	ENSMUSG00000029477
Golgi integral membrane protein 4 [Mus musculus]	77 kDa	30424814	NP_780402	Golim4	ENSMUSG00000034109		liver carboxylesterase 22 precursor [Mus musculus]	62 kDa	19526804	NP_598421	Ces1e	ENSMUSG00000061959		coiled-coil-helix-coiled-coil-helix domain-containing protein 1 [Mus musculus]	14 kDa	13384734	NP_079642	Chchd1	ENSMUSG00000063787		mannose-6-phosphate isomerase [Mus musculus]	47 kDa	91206392	NP_080113	Mpi	ENSMUSG00000032306
RAB6-interacting golgin [Mus musculus]	41 kDa	31559831	NP_849214	Gorab	ENSMUSG00000040124		coiled-coil-helix-coiled-coil-helix domain-containing protein 1 [Mus musculus]	14 kDa	13384734	NP_079642	Chchd1	ENSMUSG00000063787		chitinase domain-containing protein 1 isoform 1 [Mus musculus]	45 kDa	218083710	NP_001136153	Chid1	ENSMUSG00000025512		myeloperoxidase precursor [Mus musculus]	81 kDa	226823250	NP_034954	Mpo	ENSMUSG00000009350
Golgi reassembly-stacking protein 1 [Mus musculus]	47 kDa	30350202	NP_083252	Gorasp1	ENSMUSG00000032513		charged multivesicular body protein 6 [Mus musculus]	23 kDa	147904547	NP_001078967	Chmp6	ENSMUSG00000025371		charged multivesicular body protein 6 [Mus musculus]	23 kDa	147904547	NP_001078967	Chmp6	ENSMUSG00000025371		39S ribosomal protein L11, mitochondrial precursor [Mus musculus]	21 kDa	13384980	NP_079829	Mrpl11	ENSMUSG00000024902
Golgi reassembly-stacking protein 2 [Mus musculus]	47 kDa	224967109	NP_081628	Gorasp2	ENSMUSG00000014959		CDGSH iron-sulfur domain-containing protein 1 [Mus musculus]	12 kDa	19527228	NP_598768	Cisd1	ENSMUSG00000037710		calcium and integrin-binding protein 1 [Mus musculus]	22 kDa	6755154	NP_036000	Cib1	ENSMUSG00000030538		ribosome-recycling factor, mitochondrial precursor [Mus musculus]	29 kDa	21312752	NP_080698	Mrrf	ENSMUSG00000026887
Golgi SNAP receptor complex member 1 [Mus musculus]	28 kDa	31542904	NP_058090	Gosr1	ENSMUSG00000010392		creatine kinase U-type, mitochondrial precursor [Mus musculus]	47 kDa	6753428	NP_034027	Ckmt1	ENSMUSG00000000308		cytoskeleton-associated protein 4 [Mus musculus]	64 kDa	62526118	NP_780660	Ckap4	ENSMUSG00000046841		PREDICTED: membrane-spanning 4-domains subfamily A member 14 [Mus musculus]	135 kDa	82998267	XP_357051	Ms4a14	ENSMUSG00000024671
glypican-4 precursor [Mus musculus]	63 kDa	238624186	NP_032176	Gpc4	ENSMUSG00000031119		chloride channel CLIC-like protein 1 isoform 2 precursor [Mus musculus]	61 kDa	21704070	NP_663518	Clcc1	ENSMUSG00000027884		chloride channel CLIC-like protein 1 isoform 2 precursor [Mus musculus]	61 kDa	21704070	NP_663518	Clcc1	ENSMUSG00000027884		peptide methionine sulfoxide reductase [Mus musculus]	26 kDa	31981013	NP_080598	Msra	ENSMUSG00000054733
glycerol-3-phosphate dehydrogenase 1-like protein [Mus musculus]	38 kDa	257467604	NP_780589	Gpd1l	ENSMUSG00000050627		claudin-3 [Mus musculus]	23 kDa	6753438	NP_034032	Cldn3	ENSMUSG00000070473		claudin-3 [Mus musculus]	23 kDa	6753438	NP_034032	Cldn3	ENSMUSG00000070473		myotrophin [Mus musculus]	13 kDa	6679961	NP_032124	Mtpn	ENSMUSG00000029840
G-protein coupled receptor 64 isoform 2 [Mus musculus]	109 kDa	119943131	NP_001073326	Gpr64	ENSMUSG00000031298		chloride intracellular channel protein 1 [Mus musculus]	27 kDa	15617203	NP_254279	Clic1	ENSMUSG00000007041		claudin-7 [Mus musculus]	22 kDa	8393144	NP_058583	Cldn7	ENSMUSG00000018569		mimitin, mitochondrial precursor [Mus musculus]	20 kDa	188035926	NP_001120818	Ndufaf2	ENSMUSG00000068184
glutathione peroxidase 1 [Mus musculus]	22 kDa	84871986	NP_032186	Gpx1	ENSMUSG00000063856		chloride intracellular channel protein 3 [Mus musculus]	27 kDa	27229085	NP_081361	Clic3	ENSMUSG00000015093		chloride intracellular channel protein 4 [Mus musculus]	29 kDa	7304963	NP_038913	Clic4	ENSMUSG00000037242		NADH dehydrogenase [ubiquinone] 1 alpha subcomplex assembly factor 4 [Mus musculus]	20 kDa	21624617	NP_081018	Ndufaf4	ENSMUSG00000028261
glutathione peroxidase 7 precursor [Mus musculus]	21 kDa	13195626	NP_077160	Gpx7	ENSMUSG00000028597		chloride intracellular channel protein 4 [Mus musculus]	29 kDa	7304963	NP_038913	Clic4	ENSMUSG00000037242		chloride intracellular channel protein 5 [Mus musculus]	28 kDa	27369886	NP_766209	Clic5	ENSMUSG00000023959		NADH dehydrogenase [ubiquinone] flavoprotein 2, mitochondrial precursor [Mus musculus]	27 kDa	110625954	NP_082664	Ndufv2	ENSMUSG00000024099
probable glutathione peroxidase 8 [Mus musculus]	24 kDa	21312336	NP_081403	Gpx8	ENSMUSG00000021760		chloride intracellular channel protein 5 [Mus musculus]	28 kDa	27369886	NP_766209	Clic5	ENSMUSG00000023959		clathrin interactor 1 [Mus musculus]	68 kDa	154240730	NP_001038985	Clint1	ENSMUSG00000006169		NFU1 iron-sulfur cluster scaffold homolog, mitochondrial isoform 2 precursor [Mus musculus]	29 kDa	282154801	NP_064429	Nfu1	ENSMUSG00000029993
glutathione S-transferase Mu 1 [Mus musculus]	26 kDa	6754084	NP_034488	Gstm1	ENSMUSG00000058135		clathrin interactor 1 [Mus musculus]	68 kDa	154240730	NP_001038985	Clint1	ENSMUSG00000006169		cleft lip and palate transmembrane protein 1 homolog [Mus musculus]	75 kDa	103472025	NP_062623	Clptm1	ENSMUSG00000002981		nipsnap homolog 3A [Mus musculus]	28 kDa	226442909	NP_082805	Nipsnap3a	ENSMUSG00000015242
glutathione S-transferase Mu 2 [Mus musculus]	26 kDa	6680121	NP_032209	Gstm2	ENSMUSG00000040562		cleft lip and palate transmembrane protein 1-like protein [Mus musculus]	59 kDa	22122537	NP_666159	Clptm1l	ENSMUSG00000021610		cleft lip and palate transmembrane protein 1-like protein [Mus musculus]	59 kDa	22122537	NP_666159	Clptm1l	ENSMUSG00000021610		nucleoside diphosphate kinase homolog 5 [Mus musculus]	24 kDa	110625839	NP_542368	Nme5	ENSMUSG00000035984
glutathione S-transferase Mu 7 [Mus musculus]	26 kDa	113679874	NP_080948	Gstm7	ENSMUSG00000004035		CCR4-NOT transcription complex subunit 1 isoform 1 [Mus musculus]	267 kDa	189458842	NP_694804	Cnot1	ENSMUSG00000036550		citrate lyase subunit beta-like protein, mitochondrial precursor [Mus musculus]	38 kDa	256220113	NP_083832	Clybl	ENSMUSG00000025545		protein DJ-1 [Mus musculus]	20 kDa	55741460	NP_065594	Park7	ENSMUSG00000028964
glutathione S-transferase P 1 [Mus musculus]	24 kDa	10092608	NP_038569	Gstp1	ENSMUSG00000060803		protein canopy homolog 4 precursor [Mus musculus]	28 kDa	30519939	NP_848727	Cnpy4	ENSMUSG00000036968		CCR4-NOT transcription complex subunit 1 isoform 1 [Mus musculus]	267 kDa	189458842	NP_694804	Cnot1	ENSMUSG00000036550		phosphatidylethanolamine-binding protein 2 [Mus musculus]	21 kDa	128485805	NP_083871	Pbp2	ENSMUSG00000047104
maleylacetoacetate isomerase [Mus musculus]	24 kDa	6754092	NP_034493	Gstz1	ENSMUSG00000021033		bifunctional coenzyme A synthase [Mus musculus]	62 kDa	27229125	NP_082172	Coasy	ENSMUSG00000001755		protein canopy homolog 3 precursor [Mus musculus]	31 kDa	21312510	NP_082341	Cnpy3	ENSMUSG00000023973		protein-L-isoaspartate(D-aspartate) O-methyltransferase [Mus musculus]	30 kDa	226530884	NP_032812	Pcmt1	ENSMUSG00000019795
GTP binding protein 5 [Mus musculus]	44 kDa	134031950	NP_001076798	Gtpbp5	ENSMUSG00000039069		collagen alpha-2(VI) chain precursor [Mus musculus]	110 kDa	22203747	NP_666119	Col6a2	ENSMUSG00000020241		protein canopy homolog 4 precursor [Mus musculus]	28 kDa	30519939	NP_848727	Cnpy4	ENSMUSG00000036968		programmed cell death protein 6 [Mus musculus]	22 kDa	6755000	NP_035181	Pdcd6	ENSMUSG00000021576
guanylate kinase isoform 1 [Mus musculus]	24 kDa	226874887	NP_032219	Guk1	ENSMUSG00000020444		PREDICTED: collagen alpha-3(VI) chain isoform 4 [Mus musculus]	331 kDa	309264106	XP_003086227	Col6a3	ENSMUSG00000048126		bifunctional coenzyme A synthase [Mus musculus]	62 kDa	27229125	NP_082172	Coasy	ENSMUSG00000001755		[Pyruvate dehydrogenase [acetyl-transferring]]-phosphatase 1, mitochondrial isoform b [Mus musculus]	64 kDa	148277602	NP_001091700	Pdp1	ENSMUSG00000049225
minor histocompatibility antigen H13 isoform 2 [Mus musculus]	42 kDa	18034682	NP_034506	H13	ENSMUSG00000019188		collagen alpha-6(VI) chain isoform 1 [Mus musculus]	246 kDa	156616286	NP_001096077	Col6a6	ENSMUSG00000043719		PREDICTED: collagen alpha-3(VI) chain isoform 4 [Mus musculus]	331 kDa	309264106	XP_003086227	Col6a3	ENSMUSG00000048126		peroxisomal membrane protein 11C [Mus musculus]	27 kDa	21735445	NP_081227	Pex11c	ENSMUSG00000069633
histone H1.0 [Mus musculus]	21 kDa	31560697	NP_032223	H1f0	ENSMUSG00000048769		coenzyme Q-binding protein COQ10 homolog A, mitochondrial [Mus musculus]	29 kDa	124486652	NP_001074509	Coq10a	ENSMUSG00000039914		collagen alpha-6(VI) chain isoform 1 [Mus musculus]	246 kDa	156616286	NP_001096077	Col6a6	ENSMUSG00000043719		phosphoglycolate phosphatase [Mus musculus]	35 kDa	40254507	NP_080230	Pgp	ENSMUSG00000043445
selenoprotein S [Mus musculus]	22 kDa	111119010	NP_077759	H47	ENSMUSG00000075701		cytochrome c oxidase subunit 5A, mitochondrial precursor [Mus musculus]	16 kDa	112181182	NP_031773	Cox5a	ENSMUSG00000000088		catechol O-methyltransferase [Mus musculus]	29 kDa	161484634	NP_031770	Comt	ENSMUSG00000000326		membrane-associated progesterone receptor component 1 [Mus musculus]	22 kDa	31980806	NP_058063	Pgrmc1	ENSMUSG00000006373
2-hydroxyacyl-CoA lyase 1 [Mus musculus]	64 kDa	31560355	NP_064359	Hacl1	ENSMUSG00000021884		cytochrome c oxidase subunit 6B2 isoform 2 [Mus musculus]	11 kDa	34536823	NP_899665	Cox6b2	ENSMUSG00000051811		coatomer subunit beta [Mus musculus]	107 kDa	15426055	NP_203534	Copb1	ENSMUSG00000030754		phosphoethanolamine/phosphocholine phosphatase [Mus musculus]	30 kDa	23346533	NP_694744	Phospho1	ENSMUSG00000050860
probable histidyl-tRNA synthetase, mitochondrial precursor [Mus musculus]	57 kDa	18079343	NP_542367	Hars2	ENSMUSG00000019143		ceruloplasmin isoform b [Mus musculus]	121 kDa	110347564	NP_031778	Cp	ENSMUSG00000003617		coatomer subunit epsilon [Mus musculus]	35 kDa	10946972	NP_067513	Cope	ENSMUSG00000055681		14 kDa phosphohistidine phosphatase [Mus musculus]	14 kDa	58037409	NP_083569	Phpt1	ENSMUSG00000036504
protein-cysteine N-palmitoyltransferase HHAT-like protein [Mus musculus]	56 kDa	251823939	NP_083371	Hhatl	ENSMUSG00000032523		cysteine-rich secretory protein 1 precursor [Mus musculus]	28 kDa	157951659	NP_033768	Crisp1	ENSMUSG00000025431		coatomer subunit gamma-2 [Mus musculus]	98 kDa	8567340	NP_059506	Copg2	ENSMUSG00000025607		putative phospholipase B-like 1 precursor [Mus musculus]	63 kDa	13385274	NP_080082	Plbd1	ENSMUSG00000030214
histone H1.4 [Mus musculus]	22 kDa	13430890	NP_056602	Hist1h1e	ENSMUSG00000051627		peroxisomal carnitine O-octanoyltransferase [Mus musculus]	70 kDa	17157983	NP_076222	Crot	ENSMUSG00000003623		coatomer subunit zeta-1 [Mus musculus]	20 kDa	9789913	NP_062791	Copz1	ENSMUSG00000060992		pleckstrin homology domain-containing family H member 2 [Mus musculus]	168 kDa	188497685	NP_808274	Plekhh2	ENSMUSG00000040852
hippocalcin-like protein 1 [Mus musculus]	22 kDa	7949055	NP_057886	Hpcal1	ENSMUSG00000071379		casein kinase I isoform alpha [Mus musculus]	38 kDa	22165382	NP_666199	Csnk1a1	ENSMUSG00000024576		coenzyme Q-binding protein COQ10 homolog A, mitochondrial [Mus musculus]	29 kDa	124486652	NP_001074509	Coq10a	ENSMUSG00000039914		polyamine-modulated factor 1-binding protein 1 [Mus musculus]	119 kDa	9910570	NP_064322	Pmfbp1	ENSMUSG00000031727
heparan sulfate 2-O-sulfotransferase 1 [Mus musculus]	42 kDa	170172560	NP_035958	Hs2st1	ENSMUSG00000040151		casein kinase II subunit alpha [Mus musculus]	45 kDa	31542427	NP_031814	Csnk2a1	ENSMUSG00000074698		hexaprenyldihydroxybenzoate methyltransferase, mitochondrial [Mus musculus]	41 kDa	27369992	NP_766275	Coq3	ENSMUSG00000028247		peptidyl-prolyl cis-trans isomerase-like 1 [Mus musculus]	18 kDa	21312784	NP_081121	Ppil1	ENSMUSG00000024007
iron-sulfur cluster co-chaperone protein HscB, mitochondrial precursor [Mus musculus]	27 kDa	225703114	NP_705799	Hscb	ENSMUSG00000043510		cystatin-B [Mus musculus]	11 kDa	6681071	NP_031819	Cstb	ENSMUSG00000005054		ubiquinone biosynthesis methyltransferase COQ5, mitochondrial precursor [Mus musculus]	37 kDa	13385992	NP_080780	Coq5	ENSMUSG00000041733		IIIG9 protein [Mus musculus]	48 kDa	19526858	NP_598450	Ppp1r32	ENSMUSG00000035179
heat shock 70 kDa protein 13 precursor [Mus musculus]	52 kDa	30089677	NP_084477	Hspa13	ENSMUSG00000032932		cathepsin F precursor [Mus musculus]	52 kDa	9845246	NP_063914	Ctsf	ENSMUSG00000083282		ubiquinone biosynthesis monooxygenase COQ6 [Mus musculus]	51 kDa	283135186	NP_766170	Coq6	ENSMUSG00000021235		serine/threonine-protein phosphatase 2A activator [Mus musculus]	37 kDa	254587947	NP_620087	Ppp2r4	ENSMUSG00000039515
isopentenyl-diphosphate Delta-isomerase 1 [Mus musculus]	32 kDa	281604088	NP_663335	Idi1	ENSMUSG00000058258		cullin-3 [Mus musculus]	89 kDa	7710014	NP_057925	Cul3	ENSMUSG00000004364		ubiquinone biosynthesis protein COQ9, mitochondrial precursor [Mus musculus]	35 kDa	33859690	NP_080728	Coq9	ENSMUSG00000031782		PREDICTED: peroxiredoxin-6-like, partial [Mus musculus]	27 kDa	309266780	XP_003086860	Prdx6	ENSMUSG00000026701
ras GTPase-activating-like protein IQGAP2 [Mus musculus]	181 kDa	118344444	NP_081987	Iqgap2	ENSMUSG00000021676		copper homeostasis protein cutC homolog isoform 2 [Mus musculus]	28 kDa	165932339	NP_079806	Cutc	ENSMUSG00000025193		cytochrome c oxidase assembly protein COX15 homolog [Mus musculus]	46 kDa	31541932	NP_659123	Cox15	ENSMUSG00000040018		proteasome subunit alpha type-2 [Mus musculus]	26 kDa	134031994	NP_032970	Psma2	ENSMUSG00000015671
T-cell immunomodulatory protein precursor [Mus musculus]	67 kDa	268839462	NP_082283	Itfg1	ENSMUSG00000031703		PGAP2-interacting protein [Mus musculus]	78 kDa	31044463	NP_851840	Cwh43	ENSMUSG00000029154		ceruloplasmin isoform b [Mus musculus]	121 kDa	110347564	NP_031778	Cp	ENSMUSG00000003617		proteasome subunit beta type-1 precursor [Mus musculus]	26 kDa	7242197	NP_035315	Psmb1	ENSMUSG00000014769
inositol 1,4,5-trisphosphate receptor type 2 isoform 1 [Mus musculus]	307 kDa	60593032	NP_064307	Itpr2	ENSMUSG00000030287		cytochrome c, testis-specific [Mus musculus]	12 kDa	6753560	NP_034119	Cyct	ENSMUSG00000056436		carnitine O-palmitoyltransferase 1, liver isoform [Mus musculus]	88 kDa	162287142	NP_038523	Cpt1a	ENSMUSG00000024900		proteasome subunit beta type-4 precursor [Mus musculus]	29 kDa	254540082	NP_032971	Psmb4	ENSMUSG00000005779
IZUMO family member 4 [Mus musculus]	26 kDa	89886473	NP_082105	Izumo4	ENSMUSG00000055862		cytoplasmic FMR1-interacting protein 1 isoform a [Mus musculus]	145 kDa	164698474	NP_035500	Cyfip1	ENSMUSG00000030447		cysteine-rich with EGF-like domain protein 2 precursor [Mus musculus]	38 kDa	21313278	NP_083996	Creld2	ENSMUSG00000023272		proteasome subunit beta type-7 precursor [Mus musculus]	30 kDa	6755206	NP_035317	Psmb7	ENSMUSG00000026750
KDEL (Lys-Asp-Glu-Leu) containing 2 protein [Mus musculus]	58 kDa	47078285	NP_997610	Kdelc2	ENSMUSG00000034487		steroid 17-alpha-hydroxylase/17,20 lyase [Mus musculus]	58 kDa	160948601	NP_031835	Cyp17a1	ENSMUSG00000003555		peroxisomal carnitine O-octanoyltransferase [Mus musculus]	70 kDa	17157983	NP_076222	Crot	ENSMUSG00000003623		ras-related protein Rab-24 [Mus musculus]	23 kDa	6679591	NP_033026	Rab24	ENSMUSG00000034789
GTPase KRas [Mus musculus]	21 kDa	266458391	NP_067259	Kras	ENSMUSG00000030265		cytochrome P450, family 4, subfamily a family [Mus musculus]	58 kDa	86198314	NP_758510	Cyp4a12b	ENSMUSG00000078597		quinone oxidoreductase [Mus musculus]	35 kDa	33859530	NP_034098	Cryz	ENSMUSG00000028199		ras-related protein Rab-28 [Mus musculus]	25 kDa	58037191	NP_081571	Rab28	ENSMUSG00000029128
keratin, type I cytoskeletal 12 [Mus musculus]	53 kDa	118130981	NP_034791	Krt12	ENSMUSG00000020912		prostate and testis expressed C [Mus musculus]	12 kDa	13386080	NP_080869	D730048I06Rik	ENSMUSG00000032108		cystatin-11 precursor [Mus musculus]	16 kDa	58037521	NP_084335	Cst11	ENSMUSG00000036958		ras-related protein Rab-2B [Mus musculus]	24 kDa	30525051	NP_766189	Rab2b	ENSMUSG00000022159
keratin, type I cytoskeletal 13 [Mus musculus]	48 kDa	6754480	NP_034792	Krt13	ENSMUSG00000044041		bifunctional ATP-dependent dihydroxyacetone kinase/FAD-AMP lyase (cyclizing) [Mus musculus]	60 kDa	21703976	NP_663471	Dak	ENSMUSG00000034371		cystatin-C precursor [Mus musculus]	16 kDa	31981822	NP_034106	Cst3	ENSMUSG00000027447		regulator of chromosome condensation [Mus musculus]	45 kDa	19527092	NP_598639	Rcc1	ENSMUSG00000028896
keratin, type II cytoskeletal 4 [Mus musculus]	56 kDa	133778953	NP_032501	Krt4	ENSMUSG00000059668		DDB1- and CUL4-associated factor 7 [Mus musculus]	39 kDa	58037257	NP_082222	Dcaf7	ENSMUSG00000049354		cystatin-B [Mus musculus]	11 kDa	6681071	NP_031819	Cstb	ENSMUSG00000005054		receptor expression-enhancing protein 6 [Mus musculus]	22 kDa	21314830	NP_647453	Reep6	ENSMUSG00000035504
keratin, type II cytoskeletal 7 [Mus musculus]	51 kDa	14861854	NP_149064	Krt7	ENSMUSG00000023039		DNA damage-binding protein 1 [Mus musculus]	127 kDa	7657011	NP_056550	Ddb1	ENSMUSG00000024740		cutaneous T-cell lymphoma-associated antigen 5 homolog isoform 2 [Mus musculus]	87 kDa	259155336	NP_001158725	Ctage5	ENSMUSG00000021000		oligoribonuclease, mitochondrial precursor [Mus musculus]	27 kDa	27229283	NP_077195	Rexo2	ENSMUSG00000032026
keratin, type II cuticular Hb5 [Mus musculus]	56 kDa	31980832	NP_058575	Krt85			D-dopachrome decarboxylase [Mus musculus]	13 kDa	6753618	NP_034157	Ddt	ENSMUSG00000001666		catenin alpha-1 [Mus musculus]	100 kDa	6753294	NP_033948	Ctnna1	ENSMUSG00000037815		PREDICTED: regulator of G-protein signaling 22 [Mus musculus]	145 kDa	309270526	XP_003085110	Rgs22	ENSMUSG00000037627
neutrophil gelatinase-associated lipocalin precursor [Mus musculus]	23 kDa	34328049	NP_032517	Lcn2	ENSMUSG00000026822		beta-defensin 11 precursor [Mus musculus]	9 kDa	21361236	NP_631967	Defb11	ENSMUSG00000045337		catenin beta-1 [Mus musculus]	85 kDa	260166642	NP_001159374	Ctnnb1	ENSMUSG00000006932		RIB43A-like with coiled-coils protein 1 [Mus musculus]	45 kDa	13385124	NP_079936	Ribc1	ENSMUSG00000025257
epididymal-specific lipocalin-6 [Mus musculus]	20 kDa	166157834	NP_808508	Lcn6	ENSMUSG00000045684		beta-defensin 19 precursor [Mus musculus]	10 kDa	21553123	NP_660139	Defb19	ENSMUSG00000050645		catenin delta-1 isoform 1 [Mus musculus]	105 kDa	146219830	NP_001078919	Ctnnd1	ENSMUSG00000034101		RIIa domain-containing protein C1orf230 homolog [Mus musculus]	14 kDa	21313514	NP_079782	Riiad1	ENSMUSG00000028139
epididymal-specific lipocalin-8 precursor [Mus musculus]	20 kDa	14994308	NP_149157	Lcn8	ENSMUSG00000036449		beta-defensin 22 [Mus musculus]	18 kDa	50582603	NP_001002791	Defb22	ENSMUSG00000027468		cathepsin F precursor [Mus musculus]	52 kDa	9845246	NP_063914	Ctsf	ENSMUSG00000083282		ropporin-1-like protein [Mus musculus]	25 kDa	118150641	NP_665851	Ropn1l	ENSMUSG00000022236
plastin-2 [Mus musculus]	70 kDa	31543113	NP_032905	Lcp1	ENSMUSG00000021998		beta-defensin 23 [Mus musculus]	18 kDa	83776583	NP_001033022	Defb23	ENSMUSG00000074681		protein CASP isoform b [Mus musculus]	77 kDa	110815859	NP_941004	Cux1	ENSMUSG00000029705		protein S100-A11 [Mus musculus]	11 kDa	21886811	NP_058020	S100a11	ENSMUSG00000027907
L-lactate dehydrogenase B chain [Mus musculus]	37 kDa	6678674	NP_032518	Ldhb	ENSMUSG00000030246		beta-defensin 29 precursor [Mus musculus]	9 kDa	47824874	NP_001001444	Defb29	ENSMUSG00000044249		NADH-cytochrome b5 reductase 1 [Mus musculus]	34 kDa	21312524	NP_082333	Cyb5r1	ENSMUSG00000026456		S100 calcium binding protein A16 [Mus musculus]	14 kDa	21312760	NP_080692	S100a16	ENSMUSG00000074457
LEM domain-containing protein 2 [Mus musculus]	58 kDa	165972321	NP_666187	Lemd2	ENSMUSG00000044857		PREDICTED: LOW QUALITY PROTEIN: dynein heavy chain 7, axonemal [Mus musculus]	466 kDa	309264310	XP_911967	Dnahc7a	ENSMUSG00000067440		cytochrome c, testis-specific [Mus musculus]	12 kDa	6753560	NP_034119	Cyct	ENSMUSG00000056436		PREDICTED: SAM domain-containing protein C14orf174 [Mus musculus]	70 kDa	309262734	XP_912236	Samd15	ENSMUSG00000090812
putative lipoyltransferase 2, mitochondrial precursor [Mus musculus]	25 kDa	229577004	NP_080286	Lipt2	ENSMUSG00000030725		PREDICTED: dynein heavy chain 7, axonemal [Mus musculus]	467 kDa	309264248	XP_003086233	Dnahc7c	ENSMUSG00000078595		cytoplasmic FMR1-interacting protein 1 isoform a [Mus musculus]	145 kDa	164698474	NP_035500	Cyfip1	ENSMUSG00000030447		stromal cell-derived factor 2-like protein 1 precursor [Mus musculus]	24 kDa	11612505	NP_071719	Sdf2l1	ENSMUSG00000022769
VIP36-like protein precursor [Mus musculus]	40 kDa	61656186	NP_001013392	Lman2l	ENSMUSG00000001143		dynein intermediate chain 1, axonemal [Mus musculus]	80 kDa	227330593	NP_780347	Dnaic1	ENSMUSG00000061322		steroid 17-alpha-hydroxylase/17,20 lyase [Mus musculus]	58 kDa	160948601	NP_031835	Cyp17a1	ENSMUSG00000003555		succinate dehydrogenase [ubiquinone] cytochrome b small subunit, mitochondrial [Mus musculus]	17 kDa	27229021	NP_080124	Sdhd	ENSMUSG00000000171
prelamin-A/C isoform C [Mus musculus]	65 kDa	161760667	NP_001104572	Lmna	ENSMUSG00000028063		dnaJ homolog subfamily B member 13 [Mus musculus]	36 kDa	29648322	NP_705755	Dnajb13	ENSMUSG00000030708		hypothetical protein LOC320714 [Mus musculus]	128 kDa	62241019	NP_796214	D030016E14Rik	ENSMUSG00000038102		septin-10 isoform 1 [Mus musculus]	52 kDa	226442740	NP_001020081	Sept10	ENSMUSG00000019917
lamin-B1 [Mus musculus]	67 kDa	188219589	NP_034851	Lmnb1	ENSMUSG00000024590		dnaJ homolog subfamily B member 6 isoform a [Mus musculus]	40 kDa	83816907	NP_001033029	Dnajb6	ENSMUSG00000029131		D-2-hydroxyglutarate dehydrogenase, mitochondrial precursor [Mus musculus]	59 kDa	170014723	NP_849213	D2hgdh	ENSMUSG00000073609		glia-derived nexin precursor [Mus musculus]	44 kDa	6678099	NP_033281	Serpine2	ENSMUSG00000026249
leucyl-cystinyl aminopeptidase [Mus musculus]	117 kDa	27370240	NP_766415	Lnpep	ENSMUSG00000023845		PREDICTED: mitochondrial import inner membrane translocase subunit TIM14-like [Mus musculus]	12 kDa	309268906	XP_003084767	Dnajc19	ENSMUSG00000027679		prostate and testis expressed C [Mus musculus]	12 kDa	13386080	NP_080869	D730048I06Rik	ENSMUSG00000032108		sperm surface protein Sp17 [Mus musculus]	17 kDa	6755614	NP_035579	Spa17	ENSMUSG00000001948
PREDICTED: serine protease inhibitor A3K-like [Mus musculus]	43 kDa	309267120	XP_003086957	LOC100505251			dnaJ homolog subfamily C member 30 [Mus musculus]	25 kDa	21644569	NP_079638	Dnajc30	ENSMUSG00000061118		D-amino-acid oxidase [Mus musculus]	39 kDa	110815857	NP_034148	Dao	ENSMUSG00000042096		sperm acrosome membrane-associated protein 4 precursor [Mus musculus]	13 kDa	228480264	NP_081331	Spaca4	ENSMUSG00000070563
leucine-rich repeat-containing protein 1 isoform 1 [Mus musculus]	59 kDa	225690587	NP_001139520	Lrrc1	ENSMUSG00000032352		dnaJ homolog subfamily C member 5 [Mus musculus]	22 kDa	7949027	NP_058055	Dnajc5	ENSMUSG00000000826		28S ribosomal protein S29, mitochondrial isoform 2 [Mus musculus]	45 kDa	256985203	NP_075370	Dap3	ENSMUSG00000068921		sperm-associated antigen 8 [Mus musculus]	44 kDa	55925585	NP_001007464	Spag8	ENSMUSG00000066196
latent-transforming growth factor beta-binding protein 3 [Mus musculus]	134 kDa	124487415	NP_032546	Ltbp3	ENSMUSG00000024940		dynein light chain 1, axonemal [Mus musculus]	21 kDa	164607162	NP_083097	Dnalc1	ENSMUSG00000042523		lipoamide acyltransferase component of branched-chain alpha-keto acid dehydrogenase complex, mitochondrial [Mus musculus]	53 kDa	170172520	NP_034152	Dbt	ENSMUSG00000000340		signal peptidase complex subunit 3 [Mus musculus]	20 kDa	125988403	NP_083977	Spcs3	ENSMUSG00000054408
acyl-protein thioesterase 1 [Mus musculus]	25 kDa	6678760	NP_032892	Lypla1	ENSMUSG00000025903		dynamin-2 [Mus musculus]	98 kDa	87299637	NP_001034609	Dnm2	ENSMUSG00000033335		DDB1- and CUL4-associated factor 7 [Mus musculus]	39 kDa	58037257	NP_082222	Dcaf7	ENSMUSG00000049354		serine protease inhibitor Kazal-type 2 precursor [Mus musculus]	10 kDa	34304087	NP_899107	Spink2	ENSMUSG00000053030
cation-dependent mannose-6-phosphate receptor precursor [Mus musculus]	31 kDa	14916479	NP_034879	M6pr	ENSMUSG00000007458		dedicator of cytokinesis protein 7 [Mus musculus]	238 kDa	78191789	NP_080358	Dock7	ENSMUSG00000028556		DNA damage-binding protein 1 [Mus musculus]	127 kDa	7657011	NP_056550	Ddb1	ENSMUSG00000024740		SUN domain-containing protein 5 [Mus musculus]	40 kDa	32261334	NP_083875	Sun5	ENSMUSG00000027480
mannosyl-oligosaccharide 1,2-alpha-mannosidase IB [Mus musculus]	73 kDa	6754620	NP_034893	Man1a2	ENSMUSG00000008763		protein dpy-19 homolog 1 [Mus musculus]	84 kDa	169646320	NP_766508	Dpy19l1	ENSMUSG00000043067		2,4-dienoyl-CoA reductase, mitochondrial precursor [Mus musculus]	36 kDa	13385680	NP_080448	Decr1	ENSMUSG00000028223		T-complex protein 11 isoform 1 [Mus musculus]	62 kDa	148277067	NP_038715	Tcp11	ENSMUSG00000062859
mannosidase, alpha, class 1B, member 1 [Mus musculus]	75 kDa	71534295	NP_001025154	Man1b1	ENSMUSG00000036646		dihydropyrimidinase-related protein 2 [Mus musculus]	62 kDa	40254595	NP_034085	Dpysl2	ENSMUSG00000022048		beta-defensin 22 [Mus musculus]	18 kDa	50582603	NP_001002791	Defb22	ENSMUSG00000027468		T-complex-associated testis-expressed protein 1 [Mus musculus]	56 kDa	124430564	NP_038716	Tcte1	ENSMUSG00000023949
epididymis-specific alpha-mannosidase precursor [Mus musculus]	116 kDa	227330625	NP_032576	Man2b2	ENSMUSG00000029119		dual specificity phosphatase 21 [Mus musculus]	22 kDa	58037325	NP_082844	Dusp21	ENSMUSG00000025043		beta-defensin 23 [Mus musculus]	18 kDa	83776583	NP_001033022	Defb23	ENSMUSG00000074681		testis, prostate and placenta-expressed protein isoform 1 [Mus musculus]	25 kDa	40804746	NP_955534	Tepp	ENSMUSG00000090206
major facilitator superfamily domain-containing protein 5 [Mus musculus]	50 kDa	19527330	NP_598861	Mfsd5	ENSMUSG00000045665		dynein light chain 1, cytoplasmic [Mus musculus]	10 kDa	213688406	NP_062656	Dynll1	ENSMUSG00000009013		beta-defensin 29 precursor [Mus musculus]	9 kDa	47824874	NP_001001444	Defb29	ENSMUSG00000044249		testis-expressed sequence 13A protein [Mus musculus]	43 kDa	125347370	NP_080745	Tex13a	ENSMUSG00000071686
alpha-1,6-mannosyl-glycoprotein 2-beta-N-acetylglucosaminyltransferase [Mus musculus]	51 kDa	22122521	NP_666147	Mgat2	ENSMUSG00000043998		dynein light chain roadblock-type 2 [Mus musculus]	11 kDa	25072207	NP_083573	Dynlrb2	ENSMUSG00000034467		dehydrogenase/reductase SDR family member 7 precursor [Mus musculus]	38 kDa	226958616	NP_079798	Dhrs7	ENSMUSG00000021094		trimeric intracellular cation channel type B [Mus musculus]	33 kDa	21312532	NP_082329	Tmem38b	ENSMUSG00000028420
alpha-1,3-mannosyl-glycoprotein 4-beta-N-acetylglucosaminyltransferase B [Mus musculus]	63 kDa	253683470	NP_666038	Mgat4b	ENSMUSG00000036620		PREDICTED: dynein light chain Tctex-type 1-like isoform 2 [Mus musculus]	12 kDa	149268330	XP_001475667	Dynlt1c	ENSMUSG00000000579		dehydrogenase/reductase SDR family member on chromosome X homolog precursor [Mus musculus]	36 kDa	124244062	NP_001028498	Dhrsx			trafficking protein particle complex subunit 4 [Mus musculus]	24 kDa	11140825	NP_068561	Trappc4	ENSMUSG00000032112
cob(I)yrinic acid a,c-diamide adenosyltransferase, mitochondrial precursor [Mus musculus]	26 kDa	21313396	NP_084232	Mmab	ENSMUSG00000029575		hypothetical protein LOC329659 [Mus musculus]	34 kDa	29244450	NP_808524	E130311K13Rik	ENSMUSG00000048581		putative ATP-dependent RNA helicase DHX30 [Mus musculus]	137 kDa	19111156	NP_579925	Dhx30	ENSMUSG00000032480		tripartite motif-containing protein 42 [Mus musculus]	83 kDa	116174784	NP_084495	Trim42	ENSMUSG00000032451
molybdenum cofactor biosynthesis protein 1 isoform 1 [Mus musculus]	70 kDa	161484628	NP_064426	Mocs1	ENSMUSG00000064120		3-beta-hydroxysteroid-Delta(8),Delta(7)-isomerase [Mus musculus]	26 kDa	6681255	NP_031924	Ebp	ENSMUSG00000031168		diablo homolog, mitochondrial precursor [Mus musculus]	27 kDa	85677504	NP_075721	Diablo	ENSMUSG00000029433		tetraspanin-6 [Mus musculus]	27 kDa	31560378	NP_062630	Tspan6	ENSMUSG00000067377
motile sperm domain-containing protein 1 [Mus musculus]	24 kDa	21312580	NP_081685	Mospd1	ENSMUSG00000023074		ER degradation-enhancing alpha-mannosidase-like 3 precursor [Mus musculus]	104 kDa	163310723	NP_001034733	Edem3	ENSMUSG00000043019		dnaJ homolog subfamily C member 3 precursor [Mus musculus]	57 kDa	31542563	NP_032955	Dnajc3	ENSMUSG00000022136		tetratricopeptide repeat domain 18 isoform 3 [Mus musculus]	128 kDa	254692940	NP_083974	Ttc18	ENSMUSG00000039543
mannose-P-dolichol utilization defect 1 protein [Mus musculus]	26 kDa	31981340	NP_036030	Mpdu1	ENSMUSG00000018761		elongation factor 1-delta isoform b [Mus musculus]	31 kDa	54287684	NP_075729	Eef1d	ENSMUSG00000055762		dnaJ homolog subfamily C member 30 [Mus musculus]	25 kDa	21644569	NP_079638	Dnajc30	ENSMUSG00000061118		tetratricopeptide repeat domain 39D [Mus musculus]	70 kDa	254588114	NP_080627	Ttc39d	ENSMUSG00000046196
39S ribosomal protein L11, mitochondrial precursor [Mus musculus]	21 kDa	13384980	NP_079829	Mrpl11	ENSMUSG00000024902		elongation factor 1-gamma [Mus musculus]	50 kDa	110625979	NP_080283	Eef1g	ENSMUSG00000071644		dnaJ homolog subfamily C member 5 [Mus musculus]	22 kDa	7949027	NP_058055	Dnajc5	ENSMUSG00000000826		ubiquitin-conjugating enzyme E2 D3 [Mus musculus]	17 kDa	13384718	NP_079632	Ube2d3	ENSMUSG00000078578
39S ribosomal protein L47, mitochondrial precursor [Mus musculus]	30 kDa	29826332	NP_083293	Mrpl47	ENSMUSG00000037531		EF-hand calcium-binding domain-containing protein 6 isoform 1 [Mus musculus]	176 kDa	239052655	NP_084222	Efcab6	ENSMUSG00000022441		dynamin-2 [Mus musculus]	98 kDa	87299637	NP_001034609	Dnm2	ENSMUSG00000033335		ubiquitin-conjugating enzyme E2 J1 [Mus musculus]	35 kDa	31980960	NP_062532	Ube2j1	ENSMUSG00000028277
39S ribosomal protein L9, mitochondrial precursor [Mus musculus]	30 kDa	29789253	NP_084392	Mrpl9	ENSMUSG00000028140		EF-hand domain-containing family member B [Mus musculus]	96 kDa	255003729	NP_766085	Efhb	ENSMUSG00000023931		dedicator of cytokinesis protein 7 [Mus musculus]	238 kDa	78191789	NP_080358	Dock7	ENSMUSG00000028556		UBX domain-containing protein 6 [Mus musculus]	50 kDa	13277354	NP_077752	Ubxn6	ENSMUSG00000019578
28S ribosomal protein S23, mitochondrial [Mus musculus]	20 kDa	27228982	NP_077136	Mrps23	ENSMUSG00000023723		EF-hand domain-containing protein 1 [Mus musculus]	75 kDa	254553422	NP_082250	Efhc1	ENSMUSG00000041809		dihydropyrimidinase-related protein 2 [Mus musculus]	62 kDa	40254595	NP_034085	Dpysl2	ENSMUSG00000022048		ubiquinol-cytochrome c reductase complex chaperone CBP3 homolog [Mus musculus]	34 kDa	213512915	NP_061376	Uqcc	ENSMUSG00000005882
28S ribosomal protein S26, mitochondrial precursor [Mus musculus]	23 kDa	46402169	NP_997090	Mrps26	ENSMUSG00000037740		EH domain-containing protein 2 [Mus musculus]	61 kDa	55742711	NP_694708	Ehd2	ENSMUSG00000074364		dysferlin isoform 1 [Mus musculus]	239 kDa	116174791	NP_067444	Dysf	ENSMUSG00000033788		ubiquitin carboxyl-terminal hydrolase 7 [Mus musculus]	128 kDa	154146209	NP_001003918	Usp7	ENSMUSG00000022710
28S ribosomal protein S7, mitochondrial precursor [Mus musculus]	28 kDa	30794474	NP_079581	Mrps7	ENSMUSG00000046756		eukaryotic translation initiation factor 2 subunit 1 [Mus musculus]	36 kDa	13385624	NP_080390	Eif2s1	ENSMUSG00000021116		hypothetical protein LOC329659 [Mus musculus]	34 kDa	29244450	NP_808524	E130311K13Rik	ENSMUSG00000048581		vimentin [Mus musculus]	54 kDa	31982755	NP_035831	Vim	ENSMUSG00000026728
ribosome-recycling factor, mitochondrial precursor [Mus musculus]	29 kDa	21312752	NP_080698	Mrrf	ENSMUSG00000026887		eukaryotic translation initiation factor 3 subunit A [Mus musculus]	162 kDa	146219837	NP_034253	Eif3a	ENSMUSG00000024991		probable glutamyl-tRNA synthetase, mitochondrial precursor [Mus musculus]	58 kDa	21312986	NP_080416	Ears2	ENSMUSG00000030871		vitamin K epoxide reductase complex subunit 1 [Mus musculus]	18 kDa	30519915	NP_848715	Vkorc1	ENSMUSG00000030804
peptide methionine sulfoxide reductase [Mus musculus]	26 kDa	31981013	NP_080598	Msra	ENSMUSG00000054733		eukaryotic translation initiation factor 3 subunit M [Mus musculus]	43 kDa	21703762	NP_663355	Eif3m	ENSMUSG00000027170		enoyl-CoA hydratase domain-containing protein 1 isoform a [Mus musculus]	35 kDa	158854020	NP_080131	Echdc1	ENSMUSG00000019883		vacuolar protein-sorting-associated protein 25 [Mus musculus]	21 kDa	25092662	NP_081052	Vps25	ENSMUSG00000078656
probable asparaginyl-tRNA synthetase, mitochondrial precursor [Mus musculus]	54 kDa	157951696	NP_705819	Nars2	ENSMUSG00000018995		eukaryotic translation initiation factor 4 gamma 1 isoform a [Mus musculus]	176 kDa	56699432	NP_666053	Eif4g1	ENSMUSG00000045983		enoyl-CoA hydratase domain-containing protein 2, mitochondrial precursor [Mus musculus]	32 kDa	225543400	NP_081004	Echdc2	ENSMUSG00000028601		WD repeat-containing protein 52 [Mus musculus]	212 kDa	256818776	NP_001028419	Wdr52	ENSMUSG00000071550
neuroblastoma-amplified protein [Mus musculus]	266 kDa	255003837	NP_081982	Nbas	ENSMUSG00000020576		eukaryotic translation initiation factor 5A-1 [Mus musculus]	17 kDa	262359885	NP_001160061	Eif5a	ENSMUSG00000078812		enoyl-CoA hydratase domain-containing protein 3, mitochondrial precursor [Mus musculus]	32 kDa	31980955	NP_077170	Echdc3	ENSMUSG00000039063		WD repeat domain 63 [Mus musculus]	106 kDa	197927139	NP_766452	Wdr63	ENSMUSG00000043020
bifunctional heparan sulfate N-deacetylase/N-sulfotransferase 1 [Mus musculus]	101 kDa	42734444	NP_032332	Ndst1	ENSMUSG00000054008		zinc phosphodiesterase ELAC protein 2 [Mus musculus]	93 kDa	257153445	NP_075968	Elac2	ENSMUSG00000020549		evolutionarily conserved signaling intermediate in Toll pathway, mitochondrial precursor [Mus musculus]	50 kDa	6755522	NP_036159	Ecsit	ENSMUSG00000066839		WD repeat-containing protein 64 [Mus musculus]	124 kDa	268370090	NP_083729	Wdr64	ENSMUSG00000026523
NADH dehydrogenase [ubiquinone] 1 alpha subcomplex subunit 4 [Mus musculus]	9 kDa	33563266	NP_035016	Ndufa4	ENSMUSG00000029632		embigin precursor [Mus musculus]	37 kDa	226437629	NP_034460	Emb	ENSMUSG00000021728		ER degradation-enhancing alpha-mannosidase-like 3 precursor [Mus musculus]	104 kDa	163310723	NP_001034733	Edem3	ENSMUSG00000043019		PREDICTED: WD repeat-containing protein 66 [Mus musculus]	122 kDa	309271772	XP_485681	Wdr66	ENSMUSG00000029442
mimitin, mitochondrial precursor [Mus musculus]	20 kDa	188035926	NP_001120818	Ndufaf2	ENSMUSG00000068184		endonuclease G, mitochondrial precursor [Mus musculus]	32 kDa	6679647	NP_031957	Endog	ENSMUSG00000015337		elongation factor 1-delta isoform b [Mus musculus]	31 kDa	54287684	NP_075729	Eef1d	ENSMUSG00000055762		exportin-7 [Mus musculus]	124 kDa	12746422	NP_075532	Xpo7	ENSMUSG00000022100
NADH dehydrogenase [ubiquinone] 1 alpha subcomplex assembly factor 4 [Mus musculus]	20 kDa	21624617	NP_081018	Ndufaf4	ENSMUSG00000028261		enkurin [Mus musculus]	30 kDa	21313146	NP_082004	Enkur	ENSMUSG00000026679		EH domain-containing protein 2 [Mus musculus]	61 kDa	55742711	NP_694708	Ehd2	ENSMUSG00000074364		zinc finger, MYND domain containing 12 [Mus musculus]	41 kDa	225543354	NP_001014900	Zmynd12	ENSMUSG00000070806
NADH dehydrogenase [ubiquinone] flavoprotein 2, mitochondrial precursor [Mus musculus]	27 kDa	110625954	NP_082664	Ndufv2	ENSMUSG00000024099		erythrocyte membrane protein band 4.2 [Mus musculus]	77 kDa	7305035	NP_038541	Epb4	ENSMUSG00000023216		eukaryotic translation initiation factor 2 subunit 1 [Mus musculus]	36 kDa	13385624	NP_080390	Eif2s1	ENSMUSG00000021116		zona pellucida sperm-binding protein 3 receptor precursor [Mus musculus]	65 kDa	229577240	NP_033607	Zp3r	ENSMUSG00000042554
NFU1 iron-sulfur cluster scaffold homolog, mitochondrial isoform 2 precursor [Mus musculus]	29 kDa	282154801	NP_064429	Nfu1	ENSMUSG00000029993		bifunctional aminoacyl-tRNA synthetase [Mus musculus]	170 kDa	82617575	NP_084011	Eprs	ENSMUSG00000026615		eukaryotic translation initiation factor 3 subunit A [Mus musculus]	162 kDa	146219837	NP_034253	Eif3a	ENSMUSG00000024991
nipsnap homolog 3A [Mus musculus]	28 kDa	226442909	NP_082805	Nipsnap3a	ENSMUSG00000015242		receptor tyrosine-protein kinase erbB-2 precursor [Mus musculus]	139 kDa	54873610	NP_001003817	Erbb2	ENSMUSG00000062312		eukaryotic translation initiation factor 4 gamma 1 isoform a [Mus musculus]	176 kDa	56699432	NP_666053	Eif4g1	ENSMUSG00000045983
vesicle-fusing ATPase [Mus musculus]	83 kDa	31543349	NP_032766	Nsf	ENSMUSG00000034187		endoplasmic reticulum-Golgi intermediate compartment protein 2 isoform 1 [Mus musculus]	42 kDa	21312962	NP_080444	Ergic2	ENSMUSG00000030304		zinc phosphodiesterase ELAC protein 2 [Mus musculus]	93 kDa	257153445	NP_075968	Elac2	ENSMUSG00000020549
putative methyltransferase NSUN4 [Mus musculus]	43 kDa	21312358	NP_082418	Nsun4	ENSMUSG00000028706		erlin-1 [Mus musculus]	39 kDa	256355012	NP_663477	Erlin1	ENSMUSG00000025198		endonuclease G, mitochondrial precursor [Mus musculus]	32 kDa	6679647	NP_031957	Endog	ENSMUSG00000015337
cytosolic 5'-nucleotidase 3 [Mus musculus]	37 kDa	172072627	NP_080280	Nt5c3	ENSMUSG00000029780		endoplasmic reticulum metallopeptidase 1 [Mus musculus]	100 kDa	124487057	NP_001074682	Ermp1	ENSMUSG00000046324		ectonucleotide pyrophosphatase/phosphodiesterase family member 1 [Mus musculus]	103 kDa	153792211	NP_032839	Enpp1	ENSMUSG00000037370
5'-nucleotidase domain containing 2 [Mus musculus]	46 kDa	110625755	NP_081565	Nt5dc2	ENSMUSG00000071547		hypothetical protein LOC75811 [Mus musculus]	55 kDa	124487360	NP_001074565	Fam154a	ENSMUSG00000028492		ectonucleotide pyrophosphatase/phosphodiesterase family member 5 precursor [Mus musculus]	54 kDa	14030779	NP_114392	Enpp5	ENSMUSG00000023960
5'-nucleotidase domain-containing protein 3 [Mus musculus]	63 kDa	111494223	NP_780540	Nt5dc3	ENSMUSG00000054027		hypothetical protein LOC68936 [Mus musculus]	6 kDa	20270271	NP_620082	Fam165b	ENSMUSG00000051989		ectonucleoside triphosphate diphosphohydrolase 2 [Mus musculus]	54 kDa	161484610	NP_033979	Entpd2	ENSMUSG00000015085
nucleobindin-1 isoform 1 [Mus musculus]	53 kDa	254750698	NP_001157134	Nucb1	ENSMUSG00000030824		family with sequence similarity 24, member A precursor [Mus musculus]	11 kDa	34304065	NP_899095	Fam24a	ENSMUSG00000030859		ectonucleoside triphosphate diphosphohydrolase 6 [Mus musculus]	50 kDa	83921570	NP_742115	Entpd6	ENSMUSG00000033068
nucleoside diphosphate-linked moiety X motif 13 [Mus musculus]	39 kDa	117606387	NP_080617	Nudt13	ENSMUSG00000021809		hypothetical protein LOC66359 [Mus musculus]	13 kDa	21313516	NP_079787	Fam36a	ENSMUSG00000026500		protein 4.1 isoform 1 [Mus musculus]	96 kDa	190684669	NP_906273	Epb4.1	ENSMUSG00000028906
protein OS-9 isoform 2 precursor [Mus musculus]	70 kDa	283837907	NP_808282	Os9	ENSMUSG00000040462		hypothetical protein LOC619288 [Mus musculus]	64 kDa	158187507	NP_001103229	Fam71a	ENSMUSG00000091017		epithelial cell adhesion molecule [Mus musculus]	35 kDa	112293275	NP_032558	Epcam	ENSMUSG00000045394
ovochymase-2 precursor [Mus musculus]	68 kDa	34013516	NP_766496	Ovch2	ENSMUSG00000048236		fibrillin-1 [Mus musculus]	312 kDa	118197277	NP_032019	Fbn1	ENSMUSG00000027204		epoxide hydrolase 1 [Mus musculus]	53 kDa	6753762	NP_034275	Ephx1	ENSMUSG00000038776
platelet-activating factor acetylhydrolase 2, cytoplasmic [Mus musculus]	44 kDa	225579137	NP_598641	Pafah2	ENSMUSG00000037366		adrenodoxin, mitochondrial precursor [Mus musculus]	20 kDa	6679765	NP_032022	Fdx1	ENSMUSG00000032051		epoxide hydrolase 2 [Mus musculus]	63 kDa	31982393	NP_031966	Ephx2	ENSMUSG00000022040
multifunctional protein ADE2 [Mus musculus]	47 kDa	13385434	NP_080215	Paics	ENSMUSG00000029247		fibrinogen beta chain precursor [Mus musculus]	55 kDa	33859809	NP_862897	Fgb	ENSMUSG00000033831		bifunctional aminoacyl-tRNA synthetase [Mus musculus]	170 kDa	82617575	NP_084011	Eprs	ENSMUSG00000026615
protein DJ-1 [Mus musculus]	20 kDa	55741460	NP_065594	Park7	ENSMUSG00000028964		fibrinogen gamma chain precursor [Mus musculus]	49 kDa	19527078	NP_598623	Fgg	ENSMUSG00000033860		receptor tyrosine-protein kinase erbB-2 precursor [Mus musculus]	139 kDa	54873610	NP_001003817	Erbb2	ENSMUSG00000062312
prenylcysteine oxidase-like precursor [Mus musculus]	55 kDa	27370248	NP_766420	Pcyox1l	ENSMUSG00000024579		four and a half LIM domains protein 1 isoform 3 [Mus musculus]	32 kDa	116517334	NP_034341	Fhl1	ENSMUSG00000023092		endoplasmic reticulum-Golgi intermediate compartment protein 1 [Mus musculus]	33 kDa	13385678	NP_080446	Ergic1	ENSMUSG00000001576
PREDICTED: protein disulfide-isomerase A6-like [Mus musculus]	47 kDa	309262617	XP_003085845	Pdia6	ENSMUSG00000020571		four and a half LIM domains 4 [Mus musculus]	32 kDa	31560590	NP_034344	Fhl4	ENSMUSG00000050035		endoplasmic reticulum-Golgi intermediate compartment protein 2 isoform 1 [Mus musculus]	42 kDa	21312962	NP_080444	Ergic2	ENSMUSG00000030304
peroxisomal membrane protein 11A [Mus musculus]	28 kDa	6755034	NP_035198	Pex11a	ENSMUSG00000030545		dimethylaniline monooxygenase [N-oxide-forming] 2 [Mus musculus]	61 kDa	31542819	NP_061369	Fmo2	ENSMUSG00000040170		endoplasmic reticulum-Golgi intermediate compartment protein 3 [Mus musculus]	43 kDa	13384938	NP_079792	Ergic3	ENSMUSG00000005881
peroxisomal membrane protein 11C [Mus musculus]	27 kDa	21735445	NP_081227	Pex11c	ENSMUSG00000069633		fibronectin type III domain-containing protein 8 [Mus musculus]	36 kDa	113931164	NP_084500	Fndc8	ENSMUSG00000018844		endoplasmic reticulum lectin 1 precursor [Mus musculus]	55 kDa	114205437	NP_080021	Erlec1	ENSMUSG00000020311
peroxisome assembly protein 12 [Mus musculus]	41 kDa	19527244	NP_598786	Pex12	ENSMUSG00000018733		FAD-dependent oxidoreductase domain-containing protein 2 precursor [Mus musculus]	76 kDa	269914150	NP_001017983	Foxred2	ENSMUSG00000016552		erlin-1 [Mus musculus]	39 kDa	256355012	NP_663477	Erlin1	ENSMUSG00000025198
peroxisomal membrane protein PEX14 [Mus musculus]	41 kDa	9790153	NP_062755	Pex14	ENSMUSG00000028975		secreted frizzled-related protein 3 precursor [Mus musculus]	36 kDa	6755476	NP_035486	Frzb	ENSMUSG00000027004		endoplasmic reticulum metallopeptidase 1 [Mus musculus]	100 kDa	124487057	NP_001074682	Ermp1	ENSMUSG00000046324
peroxisomal biogenesis factor 3 isoform 1 [Mus musculus]	42 kDa	9910484	NP_064345	Pex3	ENSMUSG00000019809		FUN14 domain-containing protein 1 [Mus musculus]	17 kDa	21312526	NP_082334	Fundc1	ENSMUSG00000025040		ERO1-like protein alpha precursor [Mus musculus]	54 kDa	7657067	NP_056589	Ero1l	ENSMUSG00000021831
membrane-associated progesterone receptor component 1 [Mus musculus]	22 kDa	31980806	NP_058063	Pgrmc1	ENSMUSG00000006373		mitochondrial import inner membrane translocase subunit Tim9 B [Mus musculus]	11 kDa	9507187	NP_062375	Fxc1	ENSMUSG00000089847		extended synaptotagmin-1 [Mus musculus]	122 kDa	33859650	NP_035973	Esyt1	ENSMUSG00000025366
membrane-associated progesterone receptor component 2 [Mus musculus]	23 kDa	226442772	NP_081834	Pgrmc2	ENSMUSG00000049940		frataxin, mitochondrial precursor [Mus musculus]	23 kDa	6679863	NP_032070	Fxn	ENSMUSG00000059363		protein ETHE1, mitochondrial precursor [Mus musculus]	28 kDa	12963539	NP_075643	Ethe1	ENSMUSG00000064254
phytanoyl-CoA dioxygenase, peroxisomal precursor [Mus musculus]	39 kDa	6754564	NP_034856	Phyh	ENSMUSG00000026664		lysosomal alpha-glucosidase precursor [Mus musculus]	106 kDa	226693367	NP_032090	Gaa	ENSMUSG00000025579		fatty acid desaturase 1 [Mus musculus]	52 kDa	22164784	NP_666206	Fads1	ENSMUSG00000010663
phosphatidylserine decarboxylase proenzyme [Mus musculus]	46 kDa	126722757	NP_796272	Pisd	ENSMUSG00000023452		putative polypeptide N-acetylgalactosaminyltransferase-like protein 4 [Mus musculus]	71 kDa	31982036	NP_776100	Galntl4	ENSMUSG00000038296		fatty acid desaturase 2 [Mus musculus]	52 kDa	9790071	NP_062673	Fads2	ENSMUSG00000024665
probable carboxypeptidase PM20D1 precursor [Mus musculus]	56 kDa	227908835	NP_835180	Pm20d1	ENSMUSG00000042251		glucosylceramidase isoform 2 [Mus musculus]	58 kDa	116734815	NP_001070879	Gba	ENSMUSG00000028048		FAS-associated factor 2 [Mus musculus]	52 kDa	158533976	NP_848484	Faf2	ENSMUSG00000025873
protein POF1B [Mus musculus]	68 kDa	31657132	NP_853557	Pof1b	ENSMUSG00000034607		glutamate--cysteine ligase regulatory subunit [Mus musculus]	31 kDa	6680019	NP_032155	Gclm	ENSMUSG00000028124		hypothetical protein LOC68936 [Mus musculus]	6 kDa	20270271	NP_620082	Fam165b	ENSMUSG00000051989
GDP-fucose protein O-fucosyltransferase 1 [Mus musculus]	45 kDa	84794593	NP_536711	Pofut1	ENSMUSG00000046020		beta-galactosidase-1-like protein 3 [Mus musculus]	76 kDa	164519028	NP_001106794	Glb1l3	ENSMUSG00000031966		glycosaminoglycan xylosylkinase precursor [Mus musculus]	47 kDa	21703824	NP_663388	Fam20b	ENSMUSG00000033557
protein O-linked-mannose beta-1,2-N-acetylglucosaminyltransferase 1 isoform 1 [Mus musculus]	75 kDa	22267452	NP_080927	Pomgnt1	ENSMUSG00000028700		PREDICTED: GLIPR1-like protein 1-like [Mus musculus]	27 kDa	149261181	XP_001480681	Glipr1l1	ENSMUSG00000020213		hypothetical protein LOC66359 [Mus musculus]	13 kDa	21313516	NP_079787	Fam36a	ENSMUSG00000026500
serum paraoxonase/arylesterase 2 [Mus musculus]	40 kDa	34303979	NP_899131	Pon2	ENSMUSG00000032667		GLIPR1-like protein 2 [Mus musculus]	38 kDa	13385730	NP_080499	Glipr1l2	ENSMUSG00000020214		family 3, member A protein precursor [Mus musculus]	25 kDa	21313538	NP_079749	Fam3a	ENSMUSG00000031399
serum paraoxonase/lactonase 3 [Mus musculus]	39 kDa	27370510	NP_766594	Pon3	ENSMUSG00000029759		Golgi-associated plant pathogenesis-related protein 1 [Mus musculus]	17 kDa	47059151	NP_081726	Glipr2	ENSMUSG00000028480		D6Wsu176e protein precursor [Mus musculus]	25 kDa	42734496	NP_613053	Fam3c	ENSMUSG00000029672
phosphatidate phosphatase PPAPDC1B [Mus musculus]	29 kDa	124487352	NP_082276	Ppapdc1b	ENSMUSG00000031570		glutaredoxin-related protein 5, mitochondrial [Mus musculus]	16 kDa	21312153	NP_082695	Glrx5	ENSMUSG00000021102		farnesyl pyrophosphate synthase [Mus musculus]	41 kDa	19882207	NP_608219	Fdps	ENSMUSG00000059743
PRA1 family protein 2 [Mus musculus]	19 kDa	20070422	NP_613068	Praf2	ENSMUSG00000031149		PREDICTED: 40S ribosomal protein S18-like [Mus musculus]	18 kDa	149264635	XP_001473856	Gm10260	ENSMUSG00000057657		adrenodoxin, mitochondrial precursor [Mus musculus]	20 kDa	6679765	NP_032022	Fdx1	ENSMUSG00000032051
peroxiredoxin-4 [Mus musculus]	31 kDa	7948999	NP_058044	Prdx4	ENSMUSG00000025289		PREDICTED: sphingomyelin phosphodiesterase 3-like isoform 2 [Mus musculus]	54 kDa	309263307	XP_003086015	Gm10345	ENSMUSG00000071724		fibrinogen, alpha polypeptide isoform 1 [Mus musculus]	87 kDa	167555029	NP_001104518	Fga	ENSMUSG00000028001
PREDICTED: peroxiredoxin-6-like, partial [Mus musculus]	27 kDa	309266780	XP_003086860	Prdx6	ENSMUSG00000026701		PREDICTED: CD177 antigen [Mus musculus]	27 kDa	82904142	XP_911595	Gm1096			fibrinogen gamma chain precursor [Mus musculus]	49 kDa	19527078	NP_598623	Fgg	ENSMUSG00000033860
proteasome subunit alpha type-2 [Mus musculus]	26 kDa	134031994	NP_032970	Psma2	ENSMUSG00000015671		cytochrome c oxidase subunit 5B, mitochondrial [Mus musculus]	14 kDa	112807195	NP_034072	Gm11273	ENSMUSG00000079941		four and a half LIM domains protein 1 isoform 3 [Mus musculus]	32 kDa	116517334	NP_034341	Fhl1	ENSMUSG00000023092
proteasome subunit beta type-1 precursor [Mus musculus]	26 kDa	7242197	NP_035315	Psmb1	ENSMUSG00000014769		KUNITZ5 [Mus musculus]	12 kDa	91206446	NP_001035144	Gm14316	ENSMUSG00000074593		peptidyl-prolyl cis-trans isomerase FKBP11 precursor [Mus musculus]	22 kDa	15277331	NP_077131	Fkbp11	ENSMUSG00000003355
3-hydroxyacyl-CoA dehydratase 3 [Mus musculus]	43 kDa	171184435	NP_067320	Ptplad1	ENSMUSG00000033629		PREDICTED: 40S ribosomal protein S12-like [Mus musculus]	15 kDa	149250091	XP_001480687	Gm15887	ENSMUSG00000078087		peptidyl-prolyl cis-trans isomerase FKBP8 isoform b [Mus musculus]	44 kDa	161484656	NP_034353	Fkbp8	ENSMUSG00000019428
peroxisome biogenesis factor 2 [Mus musculus]	35 kDa	21687248	NP_033020	Pxmp3	ENSMUSG00000040374		ganglioside GM2 activator precursor [Mus musculus]	21 kDa	6806917	NP_034429	Gm2a	ENSMUSG00000000594		dimethylaniline monooxygenase [N-oxide-forming] 2 [Mus musculus]	61 kDa	31542819	NP_061369	Fmo2	ENSMUSG00000040170
pyrroline-5-carboxylate reductase 1, mitochondrial [Mus musculus]	32 kDa	21450149	NP_659044	Pycr1	ENSMUSG00000025140		PREDICTED: brain protein 44-like protein-like isoform 2 [Mus musculus]	12 kDa	149263552	XP_001477052	Gm3452	ENSMUSG00000091498		FAD-dependent oxidoreductase domain-containing protein 2 precursor [Mus musculus]	76 kDa	269914150	NP_001017983	Foxred2	ENSMUSG00000016552
glutamyl-tRNA(Gln) amidotransferase subunit A homolog [Mus musculus]	57 kDa	124486688	NP_001074523	Qrsl1	ENSMUSG00000019863		PREDICTED: 60S ribosomal protein L23a-like [Mus musculus]	16 kDa	149233872	XP_001478531	Gm3940	ENSMUSG00000078291		secreted frizzled-related protein 3 precursor [Mus musculus]	36 kDa	6755476	NP_035486	Frzb	ENSMUSG00000027004
ras-related protein Rab-21 [Mus musculus]	24 kDa	33859751	NP_077774	Rab21	ENSMUSG00000020132		PREDICTED: alpha-1-antiproteinase-like [Mus musculus]	47 kDa	82943105	XP_112098	Gm46	ENSMUSG00000071179		ferritin light chain 1 [Mus musculus]	21 kDa	114326466	NP_034370	Ftl1	ENSMUSG00000050708
ras-related protein Rab-24 [Mus musculus]	23 kDa	6679591	NP_033026	Rab24	ENSMUSG00000034789		brain protein 44-like protein 2 [Mus musculus]	13 kDa	168229152	NP_001094954	Gm4984			FUN14 domain-containing protein 1 [Mus musculus]	17 kDa	21312526	NP_082334	Fundc1	ENSMUSG00000025040
ras-related protein Rab-33B [Mus musculus]	26 kDa	8394133	NP_058554	Rab33b	ENSMUSG00000027739		hypothetical protein LOC209005 [Mus musculus]	76 kDa	148225760	NP_001078968	Gm595	ENSMUSG00000079606		FUN14 domain-containing protein 2 [Mus musculus]	17 kDa	262050556	NP_080402	Fundc2	ENSMUSG00000031198
ras-related protein Rab-35 [Mus musculus]	23 kDa	37718983	NP_937806	Rab35	ENSMUSG00000029518		PREDICTED: cytochrome c oxidase subunit 7A-related protein, mitochondrial-like isoform 1 [Mus musculus]	13 kDa	94392438	XP_001004846	Gm6969			mitochondrial import inner membrane translocase subunit Tim9 B [Mus musculus]	11 kDa	9507187	NP_062375	Fxc1	ENSMUSG00000089847
ras-related protein Rab-4B [Mus musculus]	24 kDa	21313012	NP_083667	Rab4b	ENSMUSG00000053291		hypothetical protein LOC631784 [Mus musculus]	38 kDa	262263360	NP_001034329	Gm7073	ENSMUSG00000079583		frataxin, mitochondrial precursor [Mus musculus]	23 kDa	6679863	NP_032070	Fxn	ENSMUSG00000059363
ras-related protein Rab-5A [Mus musculus]	24 kDa	13385374	NP_080163	Rab5a	ENSMUSG00000017831		hypothetical protein LOC636104 [Mus musculus]	106 kDa	150010636	NP_001092777	Gm7173	ENSMUSG00000073077		glucose-6-phosphate 1-dehydrogenase X [Mus musculus]	59 kDa	6996917	NP_032088	G6pdx	ENSMUSG00000031400
ras-related protein Rab-5B isoform 1 [Mus musculus]	24 kDa	28916687	NP_803130	Rab5b	ENSMUSG00000000711		glucose-6-phosphate isomerase [Mus musculus]	63 kDa	254553458	NP_032181	Gpi1	ENSMUSG00000036427		lysosomal alpha-glucosidase precursor [Mus musculus]	106 kDa	226693367	NP_032090	Gaa	ENSMUSG00000025579
ras-related protein Rab-9A [Mus musculus]	23 kDa	9790227	NP_062747	Rab9	ENSMUSG00000079316		phosphatidylinositol-glycan-specific phospholipase D [Mus musculus]	94 kDa	111378397	NP_032182	Gpld1	ENSMUSG00000021340		N-acetylgalactosamine-6-sulfatase precursor [Mus musculus]	58 kDa	171184398	NP_057931	Galns	ENSMUSG00000015027
ras-related protein Ral-B precursor [Mus musculus]	23 kDa	11612509	NP_071722	Ralb	ENSMUSG00000004451		glutathione reductase, mitochondrial precursor [Mus musculus]	54 kDa	160298213	NP_034474	Gsr	ENSMUSG00000031584		polypeptide N-acetylgalactosaminyltransferase 1 [Mus musculus]	64 kDa	237874259	NP_038842	Galnt1	ENSMUSG00000000420
ras-related protein Rap-1b precursor [Mus musculus]	21 kDa	33859753	NP_077777	Rap1b	ENSMUSG00000052681		gene trap locus 3 [Mus musculus]	23 kDa	225543576	NP_032213	Gtl3	ENSMUSG00000031796		polypeptide N-acetylgalactosaminyltransferase 12 [Mus musculus]	67 kDa	27370010	NP_766281	Galnt12	ENSMUSG00000039774
retinol dehydrogenase 12 [Mus musculus]	35 kDa	58037513	NP_084293	Rdh12	ENSMUSG00000021123		GTP-binding protein 10 [Mus musculus]	40 kDa	83320123	NP_694756	Gtpbp10	ENSMUSG00000040464		polypeptide N-acetylgalactosaminyltransferase 2 [Mus musculus]	65 kDa	46877109	NP_644678	Galnt2	ENSMUSG00000089704
oligoribonuclease, mitochondrial precursor [Mus musculus]	27 kDa	27229283	NP_077195	Rexo2	ENSMUSG00000032026		GTP-binding protein 8 isoform 1 [Mus musculus]	32 kDa	21313623	NP_079608	Gtpbp8	ENSMUSG00000022668		N-acetylgalactosaminyltransferase 7 isoform 1 [Mus musculus]	75 kDa	269784707	NP_653332	Galnt7	ENSMUSG00000031608
ammonium transporter Rh type C [Mus musculus]	55 kDa	229092834	NP_062773	Rhcg	ENSMUSG00000030549		histocompatibility 2, class II antigen A, beta 1 precursor [Mus musculus]	30 kDa	294997230	NP_996988	H2-Ab1	ENSMUSG00000073421		putative polypeptide N-acetylgalactosaminyltransferase-like protein 4 [Mus musculus]	71 kDa	31982036	NP_776100	Galntl4	ENSMUSG00000038296
E3 ubiquitin-protein ligase RNF149 precursor [Mus musculus]	43 kDa	224809379	NP_001028307	Rnf149	ENSMUSG00000048234		histone variant H2al2 [Mus musculus]	13 kDa	13386112	NP_080903	H2afb1	ENSMUSG00000062651		glucosylceramidase isoform 2 [Mus musculus]	58 kDa	116734815	NP_001070879	Gba	ENSMUSG00000028048
PREDICTED: LOW QUALITY PROTEIN: RING finger protein 213 [Mus musculus]	592 kDa	309262466	XP_001476701	Rnf213	ENSMUSG00000070327		histone H2A.x [Mus musculus]	15 kDa	7106331	NP_034566	H2afx	ENSMUSG00000049932		GRIP and coiled-coil domain-containing protein 2 [Mus musculus]	195 kDa	61742806	NP_081651	Gcc2	ENSMUSG00000038039
RING finger and transmembrane domain-containing protein 1 [Mus musculus]	45 kDa	21313294	NP_084064	Rnft1	ENSMUSG00000020521		histone deacetylase 6 [Mus musculus]	126 kDa	194353997	NP_034543	Hdac6	ENSMUSG00000031161		GCN1 general control of amino-acid synthesis 1-like 1 [Mus musculus]	293 kDa	112807186	NP_766307	Gcn1l1	ENSMUSG00000041638
60S ribosomal protein L36 [Mus musculus]	12 kDa	160333837	NP_061200	Rpl36	ENSMUSG00000057863		haloacid dehalogenase-like hydrolase domain-containing protein 2 isoform 1 [Mus musculus]	29 kDa	21313310	NP_084102	Hdhd2	ENSMUSG00000025421		glycerophosphodiester phosphodiesterase 1 [Mus musculus]	38 kDa	9625018	NP_062526	Gde1	ENSMUSG00000033917
ras-related protein R-Ras precursor [Mus musculus]	24 kDa	6677819	NP_033127	Rras	ENSMUSG00000038387		vigilin [Mus musculus]	142 kDa	19527028	NP_598569	Hdlbp	ENSMUSG00000034088		rab GDP dissociation inhibitor beta [Mus musculus]	51 kDa	116089273	NP_032138	Gdi2	ENSMUSG00000021218
reticulon-3 isoform 4 [Mus musculus]	25 kDa	16716353	NP_444306	Rtn3	ENSMUSG00000024758		HIG1 domain family member 1A [Mus musculus]	10 kDa	9789977	NP_062788	Higd1a	ENSMUSG00000038412		elongation factor G, mitochondrial precursor [Mus musculus]	84 kDa	170650599	NP_613057	Gfm1	ENSMUSG00000027774
protein S100-A11 [Mus musculus]	11 kDa	21886811	NP_058020	S100a11	ENSMUSG00000027907		histidine triad nucleotide-binding protein 1 [Mus musculus]	14 kDa	33468857	NP_032274	Hint1	ENSMUSG00000020267		GLIPR1-like protein 2 [Mus musculus]	38 kDa	13385730	NP_080499	Glipr1l2	ENSMUSG00000020214
sec1 family domain-containing protein 1 [Mus musculus]	72 kDa	58037481	NP_084101	Scfd1	ENSMUSG00000020952		huntingtin-interacting protein 1-related protein [Mus musculus]	119 kDa	255308928	NP_659507	Hip1r	ENSMUSG00000000915		Golgi-associated plant pathogenesis-related protein 1 [Mus musculus]	17 kDa	47059151	NP_081726	Glipr2	ENSMUSG00000028480
sec1 family domain-containing protein 2 isoform a [Mus musculus]	75 kDa	167900448	NP_001108132	Scfd2	ENSMUSG00000062110		high mobility group protein B1 [Mus musculus]	25 kDa	162329617	NP_001104752	Hmg1l1	ENSMUSG00000066530		glyoxalase domain-containing protein 4 [Mus musculus]	33 kDa	255003777	NP_080305	Glod4	ENSMUSG00000017286
stromal cell-derived factor 2-like protein 1 precursor [Mus musculus]	24 kDa	11612505	NP_071719	Sdf2l1	ENSMUSG00000022769		ribonuclease UK114 [Mus musculus]	14 kDa	40807498	NP_032313	Hrsp12	ENSMUSG00000022323		glutaminase isoform 1 [Mus musculus]	74 kDa	124487313	NP_001074550	Gls	ENSMUSG00000026103
succinate dehydrogenase [ubiquinone] cytochrome b small subunit, mitochondrial [Mus musculus]	17 kDa	27229021	NP_080124	Sdhd	ENSMUSG00000000171		3 beta-hydroxysteroid dehydrogenase type 7 isoform a [Mus musculus]	41 kDa	100817045	NP_598704	Hsd3b7	ENSMUSG00000042289		PREDICTED: 40S ribosomal protein S18-like [Mus musculus]	18 kDa	149264635	XP_001473856	Gm10260	ENSMUSG00000057657
short-chain dehydrogenase/reductase family 42E member 1 [Mus musculus]	44 kDa	21311981	NP_083001	Sdr42e1	ENSMUSG00000034308		heat shock protein HSP 90-alpha [Mus musculus]	85 kDa	6754254	NP_034610	Hsp90aa1	ENSMUSG00000021270		PREDICTED: 40S ribosomal protein S12-like [Mus musculus]	15 kDa	149250091	XP_001480687	Gm15887	ENSMUSG00000078087
serpin H1 precursor [Mus musculus]	47 kDa	161353502	NP_033955	Serpinh1	ENSMUSG00000070436		heat shock 70 kDa protein 1B [Mus musculus]	70 kDa	124339826	NP_034608	Hspa1b	ENSMUSG00000090877		ganglioside GM2 activator precursor [Mus musculus]	21 kDa	6806917	NP_034429	Gm2a	ENSMUSG00000000594
sphingosine-1-phosphate lyase 1 [Mus musculus]	64 kDa	31543694	NP_033189	Sgpl1	ENSMUSG00000020097		heat shock 70 kDa protein 4L [Mus musculus]	94 kDa	40254361	NP_035150	Hspa4l	ENSMUSG00000025757		PREDICTED: 60S ribosomal protein L10-like [Mus musculus]	25 kDa	149259021	XP_001477595	Gm3405
sphingosine-1-phosphate phosphatase 1 [Mus musculus]	48 kDa	13507712	NP_109675	Sgpp1	ENSMUSG00000021054		hsp70-binding protein 1 [Mus musculus]	39 kDa	13195602	NP_077134	Hspbp1	ENSMUSG00000063802		PREDICTED: 60S ribosomal protein L23a-like [Mus musculus]	16 kDa	149233872	XP_001478531	Gm3940	ENSMUSG00000078291
short stature homeobox protein 2 [Mus musculus]	35 kDa	7305489	NP_038693	Shox2	ENSMUSG00000093425		serine protease HTRA2, mitochondrial [Mus musculus]	49 kDa	254281222	NP_062726	Htra2	ENSMUSG00000068329		flavin-containing monooxygenase 13 [Mus musculus]	62 kDa	256221758	NP_001157778	Gm4846	ENSMUSG00000086056
solute carrier family 17 member 9 [Mus musculus]	48 kDa	125347351	NP_898984	Slc17a9	ENSMUSG00000023393		hyaluronidase PH-20 [Mus musculus]	61 kDa	74315965	NP_083233	Hyal5	ENSMUSG00000029678		hypothetical protein LOC636104 [Mus musculus]	106 kDa	150010636	NP_001092777	Gm7173	ENSMUSG00000073077
excitatory amino acid transporter 3 [Mus musculus]	57 kDa	6678001	NP_033225	Slc1a1	ENSMUSG00000024935		hydrocephalus-inducing protein [Mus musculus]	582 kDa	46361984	NP_766504	Hydin	ENSMUSG00000059854		hypothetical protein LOC328788 precursor [Mus musculus]	11 kDa	85702211	NP_001030043	Gm749	ENSMUSG00000024224
calcium-binding mitochondrial carrier protein SCaMC-1 [Mus musculus]	53 kDa	27369998	NP_766273	Slc25a24	ENSMUSG00000040322		interferon-induced transmembrane protein 3 [Mus musculus]	15 kDa	21539593	NP_079654	Ifitm3	ENSMUSG00000025492		guanine nucleotide-binding protein subunit alpha-11 [Mus musculus]	42 kDa	6754004	NP_034431	Gna11	ENSMUSG00000034781
solute carrier family 25 member 45 [Mus musculus]	32 kDa	23956272	NP_598915	Slc25a45	ENSMUSG00000024818		mitochondrial inner membrane protease subunit 2 [Mus musculus]	20 kDa	31981468	NP_444352	Immp2l	ENSMUSG00000056899		guanine nucleotide-binding protein G(i) subunit alpha-2 [Mus musculus]	40 kDa	41054806	NP_032164	Gnai2	ENSMUSG00000032562
long-chain fatty acid transport protein 1 [Mus musculus]	71 kDa	6755546	NP_036107	Slc27a1	ENSMUSG00000031808		inositol monophosphatase 1 [Mus musculus]	30 kDa	31980942	NP_061352	Impa1	ENSMUSG00000027531		guanine nucleotide-binding protein G(q) subunit alpha [Mus musculus]	42 kDa	84662745	NP_032165	Gnaq	ENSMUSG00000024639
zinc transporter 5 [Mus musculus]	84 kDa	67763826	NP_075023	Slc30a5	ENSMUSG00000021629		importin-7 [Mus musculus]	119 kDa	74229034	NP_852658	Ipo7	ENSMUSG00000066232		guanine nucleotide-binding protein G(I)/G(S)/G(T) subunit beta-1 [Mus musculus]	37 kDa	229608938	NP_001153488	Gnb1	ENSMUSG00000029064
zinc transporter 9 [Mus musculus]	63 kDa	125660458	NP_848766	Slc30a9	ENSMUSG00000029221		IQ motif containing F4 [Mus musculus]	24 kDa	54020727	NP_080366	Iqcf4	ENSMUSG00000041009		guanine nucleotide-binding protein subunit beta-2-like 1 [Mus musculus]	35 kDa	6680047	NP_032169	Gnb2l1	ENSMUSG00000020372
acetyl-coenzyme A transporter 1 [Mus musculus]	61 kDa	31543730	NP_056543	Slc33a1	ENSMUSG00000027822		IQ domain-containing protein F5 [Mus musculus]	18 kDa	222831630	NP_083576	Iqcf5	ENSMUSG00000066382		guanine nucleotide-binding protein G(I)/G(S)/G(O) subunit gamma-12 [Mus musculus]	8 kDa	13384618	NP_079554	Gng12	ENSMUSG00000036402
CMP-sialic acid transporter [Mus musculus]	36 kDa	225543514	NP_036025	Slc35a1	ENSMUSG00000028293		IQ and ubiquitin-like domain-containing protein [Mus musculus]	92 kDa	255683447	NP_766123	Iqub	ENSMUSG00000046192		Golgin subfamily A member 5 [Mus musculus]	82 kDa	7305095	NP_038775	Golga5	ENSMUSG00000021192
UDP-galactose translocator isoform 1 [Mus musculus]	41 kDa	145279183	NP_511039	Slc35a2	ENSMUSG00000031156		interferon-stimulated gene 20 kDa protein [Mus musculus]	21 kDa	15805028	NP_065608	Isg20	ENSMUSG00000039236		golgi autoantigen, golgin subfamily b, macrogolgin 1 [Mus musculus]	370 kDa	226958601	NP_084311	Golgb1	ENSMUSG00000034243
solute carrier family 35 member E1 [Mus musculus]	44 kDa	165377022	NP_808434	Slc35e1	ENSMUSG00000019731		integrin alpha-3 [Mus musculus]	117 kDa	7305189	NP_038593	Itga3	ENSMUSG00000001507		Golgi membrane protein 1 [Mus musculus]	44 kDa	78190500	NP_001030294	Golm1	ENSMUSG00000021556
glucose-6-phosphate translocase [Mus musculus]	46 kDa	51592076	NP_032089	Slc37a4	ENSMUSG00000032114		inositol 1,4,5-trisphosphate receptor type 1 [Mus musculus]	313 kDa	291327470	NP_034715	Itpr1	ENSMUSG00000030102		Golgi phosphoprotein 3 [Mus musculus]	34 kDa	14140240	NP_079949	Golph3	ENSMUSG00000022200
sodium-coupled neutral amino acid transporter 5 [Mus musculus]	53 kDa	154350209	NP_766067	Slc38a5	ENSMUSG00000031170		inositol 1,4,5-trisphosphate receptor type 3 [Mus musculus]	304 kDa	61102728	NP_542120	Itpr3	ENSMUSG00000042644		vesicle transport protein GOT1B [Mus musculus]	15 kDa	13385354	NP_080148	Golt1b	ENSMUSG00000030245
RAG1-activating protein 1 [Mus musculus]	25 kDa	188497726	NP_033083	Slc50a1	ENSMUSG00000027953		kinesin-1 heavy chain [Mus musculus]	110 kDa	61657921	NP_032474	Kif5b	ENSMUSG00000006740		Golgi SNAP receptor complex member 2 [Mus musculus]	25 kDa	24528553	NP_062624	Gosr2	ENSMUSG00000020946
large neutral amino acids transporter small subunit 1 [Mus musculus]	56 kDa	31982764	NP_035534	Slc7a5	ENSMUSG00000040010		importin subunit beta-1 [Mus musculus]	97 kDa	88014720	NP_032405	Kpnb1	ENSMUSG00000001440		glycerol-3-phosphate acyltransferase 1, mitochondrial precursor [Mus musculus]	94 kDa	34536827	NP_032175	Gpam	ENSMUSG00000024978
U5 small nuclear ribonucleoprotein 200 kDa helicase [Mus musculus]	245 kDa	40018610	NP_796188	Snrnp200	ENSMUSG00000003660		keratin, type II cytoskeletal 73 [Mus musculus]	59 kDa	47059013	NP_997650	Krt73	ENSMUSG00000063661		glycerol-3-phosphate dehydrogenase [NAD+], cytoplasmic [Mus musculus]	38 kDa	6753966	NP_034401	Gpd1	ENSMUSG00000023019
sperm associated antigen 11B isoform c [Mus musculus]	13 kDa	269847788	NP_001034652	Spag11b	ENSMUSG00000059463		serine beta-lactamase-like protein LACTB, mitochondrial precursor [Mus musculus]	61 kDa	13507666	NP_109642	Lactb	ENSMUSG00000032370		phosphatidylinositol-glycan-specific phospholipase D [Mus musculus]	94 kDa	111378397	NP_032182	Gpld1	ENSMUSG00000021340
signal peptidase complex subunit 3 [Mus musculus]	20 kDa	125988403	NP_083977	Spcs3	ENSMUSG00000054408		laminin subunit beta-1 [Mus musculus]	202 kDa	114326497	NP_032508	Lamb1	ENSMUSG00000002900		gelsolin precursor [Mus musculus]	86 kDa	28916693	NP_666232	Gsn	ENSMUSG00000026879
serine palmitoyltransferase 1 [Mus musculus]	53 kDa	29244577	NP_033295	Sptlc1	ENSMUSG00000021468		laminin subunit beta-2 precursor [Mus musculus]	197 kDa	31982223	NP_032509	Lamb2	ENSMUSG00000052911		glutathione reductase, mitochondrial precursor [Mus musculus]	54 kDa	160298213	NP_034474	Gsr	ENSMUSG00000031584
CMP-N-acetylneuraminate-beta-galactosamide-alpha-2,3-sialyltransferase 1 [Mus musculus]	39 kDa	6677957	NP_033203	St3gal1	ENSMUSG00000013846		laminin subunit gamma-1 precursor [Mus musculus]	177 kDa	153791270	NP_034813	Lamc1	ENSMUSG00000026478		GTP-binding protein 10 [Mus musculus]	40 kDa	83320123	NP_694756	Gtpbp10	ENSMUSG00000040464
CMP-N-acetylneuraminate-beta-galactosamide-alpha-2,3-sialyltransferase 2 [Mus musculus]	40 kDa	159110598	NP_033205	St3gal2	ENSMUSG00000031749		lysosome-associated membrane glycoprotein 2 isoform 2 [Mus musculus]	46 kDa	31543108	NP_034815	Lamp2	ENSMUSG00000016534		GTP-binding protein 8 isoform 1 [Mus musculus]	32 kDa	21313623	NP_079608	Gtpbp8	ENSMUSG00000022668
alpha-N-acetylgalactosaminide alpha-2,6-sialyltransferase 2 [Mus musculus]	42 kDa	31543707	NP_033206	St6galnac2	ENSMUSG00000057286		mitogen-activated protein-binding protein-interacting protein [Mus musculus]	13 kDa	13752573	NP_112538	Lamtor2	ENSMUSG00000028062		glycerol kinase isoform 2 [Mus musculus]	61 kDa	46909579	NP_997609	Gyk	ENSMUSG00000025059
alpha-N-acetyl-neuraminyl-2,3-beta-galactosyl-1,3-N-acetyl-galactosaminide alpha-2,6-sialyltransferase [Mus musculus]	34 kDa	6755512	NP_035503	St6galnac4	ENSMUSG00000079442		mitogen-activated protein kinase scaffold protein 1 [Mus musculus]	14 kDa	9910452	NP_064304	Lamtor3	ENSMUSG00000091512		histocompatibility 2, class II antigen A, beta 1 precursor [Mus musculus]	30 kDa	294997230	NP_996988	H2-Ab1	ENSMUSG00000073421
synaptotagmin-like protein 4 [Mus musculus]	76 kDa	7305099	NP_038785	Sytl4	ENSMUSG00000031255		lanC-like protein 1 [Mus musculus]	45 kDa	21489937	NP_067270	Lancl1	ENSMUSG00000026000		histone H2A.V [Mus musculus]	14 kDa	256773209	NP_084214	H2afv	ENSMUSG00000041126
antigen peptide transporter 2 [Mus musculus]	77 kDa	239915963	NP_035660	Tap2	ENSMUSG00000024339		leucyl-tRNA synthetase, cytoplasmic [Mus musculus]	134 kDa	120537241	NP_598898	Lars	ENSMUSG00000024493		core histone macro-H2A.1 isoform 2 [Mus musculus]	40 kDa	283945572	NP_001152985	H2afy	ENSMUSG00000015937
transmembrane epididymal protein 1 [Mus musculus]	35 kDa	229892334	NP_839975	Teddm1	ENSMUSG00000047053		LAG1 longevity assurance homolog 2 [Mus musculus]	45 kDa	22095015	NP_084065	Lass2	ENSMUSG00000015714		H-2 class I histocompatibility antigen, L-D alpha chain precursor [Mus musculus]	41 kDa	133778955	NP_034510	H2-D1	ENSMUSG00000073411
protein-glutamine gamma-glutamyltransferase E [Mus musculus]	77 kDa	124001551	NP_033400	Tgm3	ENSMUSG00000027401		epididymal-specific lipocalin-12 precursor [Mus musculus]	22 kDa	58037499	NP_084234	Lcn12	ENSMUSG00000026943		GDH/6PGL endoplasmic bifunctional protein [Mus musculus]	90 kDa	31982147	NP_775547	H6pd	ENSMUSG00000028980
mitochondrial import inner membrane translocase subunit Tim13 [Mus musculus]	10 kDa	7305581	NP_038923	Timm13	ENSMUSG00000020219		hormone-sensitive lipase isoform 1 [Mus musculus]	88 kDa	87239970	NP_034849	Lipe	ENSMUSG00000003123		cytochrome c-type heme lyase [Mus musculus]	31 kDa	225543251	NP_032248	Hccs	ENSMUSG00000031352
transmembrane 9 superfamily member 1 precursor [Mus musculus]	69 kDa	27229185	NP_083056	Tm9sf1	ENSMUSG00000002320		PREDICTED: NHP2-like protein 1-like [Mus musculus]	14 kDa	309261987	XP_003085225	LOC100505330			histone deacetylase 6 [Mus musculus]	126 kDa	194353997	NP_034543	Hdac6	ENSMUSG00000031161
transmembrane emp24 domain-containing protein 4 precursor [Mus musculus]	26 kDa	19527236	NP_598781	Tmed4	ENSMUSG00000004394		lysophospholipid acyltransferase 5 [Mus musculus]	56 kDa	21699058	NP_660112	Lpcat3	ENSMUSG00000004270		haloacid dehalogenase-like hydrolase domain-containing protein 2 isoform 1 [Mus musculus]	29 kDa	21313310	NP_084102	Hdhd2	ENSMUSG00000025421
transmembrane emp24 domain-containing protein 5 precursor [Mus musculus]	26 kDa	21746165	NP_083152	Tmed5	ENSMUSG00000063406		lipoma-preferred partner homolog isoform 1 [Mus musculus]	66 kDa	225543157	NP_848780	Lpp	ENSMUSG00000033306		vigilin [Mus musculus]	142 kDa	19527028	NP_598569	Hdlbp	ENSMUSG00000034088
transmembrane protein 115 [Mus musculus]	38 kDa	9790165	NP_062678	Tmem115	ENSMUSG00000010045		lipopolysaccharide-responsive and beige-like anchor protein isoform beta [Mus musculus]	309 kDa	117956397	NP_001071156	Lrba	ENSMUSG00000028080		beta-hexosaminidase subunit alpha precursor [Mus musculus]	61 kDa	67514549	NP_034551	Hexa	ENSMUSG00000025232
transmembrane protein 135 [Mus musculus]	52 kDa	228008286	NP_082619	Tmem135	ENSMUSG00000039428		leucine-rich repeat-containing protein 18 isoform 1 [Mus musculus]	30 kDa	13385762	NP_080529	Lrrc18	ENSMUSG00000041673		huntingtin-interacting protein 1-related protein [Mus musculus]	119 kDa	255308928	NP_659507	Hip1r	ENSMUSG00000000915
transmembrane protein 33 isoform 1 [Mus musculus]	28 kDa	22267448	NP_083251	Tmem33	ENSMUSG00000037720		PREDICTED: leucine-rich repeat-containing protein 37A2 [Mus musculus]	139 kDa	309262425	XP_911630	Lrrc37a	ENSMUSG00000078632		hydroxymethylglutaryl-CoA synthase, mitochondrial precursor [Mus musculus]	57 kDa	31560689	NP_032282	Hmgcs2	ENSMUSG00000027875
transmembrane protein 55B [Mus musculus]	30 kDa	84095197	NP_001028443	Tmem55b	ENSMUSG00000035953		leucine-rich repeat-containing protein 48 [Mus musculus]	61 kDa	21312844	NP_083320	Lrrc48	ENSMUSG00000056598		heterogeneous nuclear ribonucleoprotein K [Mus musculus]	51 kDa	13384620	NP_079555	Hnrnpk	ENSMUSG00000021546
transmembrane protein 87A isoform 1 [Mus musculus]	64 kDa	160333201	NP_776095	Tmem87a	ENSMUSG00000033808		leucine-rich repeat and coiled-coil domain-containing protein 1 isoform 3 [Mus musculus]	115 kDa	254675306	NP_083191	Lrrcc1	ENSMUSG00000027550		dihydrodipicolinate synthase-like, mitochondrial precursor [Mus musculus]	35 kDa	13385656	NP_080428	Hoga1	ENSMUSG00000025176
TATA element modulatory factor [Mus musculus]	122 kDa	124487429	NP_001074580	Tmf1	ENSMUSG00000030059		lactotransferrin precursor [Mus musculus]	78 kDa	31560677	NP_032548	Ltf	ENSMUSG00000032496		3-keto-steroid reductase [Mus musculus]	37 kDa	87162470	NP_034606	Hsd17b7	ENSMUSG00000026675
PREDICTED: transmembrane protein with metallophosphoesterase domain-like [Mus musculus]	49 kDa	309266624	XP_003086812	Tmppe			LYR motif-containing protein 4 [Mus musculus]	11 kDa	41235733	NP_958746	Lyrm4	ENSMUSG00000046573		3 beta-hydroxysteroid dehydrogenase type 7 isoform a [Mus musculus]	41 kDa	100817045	NP_598704	Hsd3b7	ENSMUSG00000042289
transmembrane and TPR repeat-containing protein 3 isoform 1 [Mus musculus]	104 kDa	158517929	NP_001103483	Tmtc3	ENSMUSG00000036676		lysozyme-like protein 1 precursor [Mus musculus]	17 kDa	13385592	NP_080368	Lyzl1	ENSMUSG00000024233		inactive hydroxysteroid dehydrogenase-like protein 1 [Mus musculus]	37 kDa	30424792	NP_780394	Hsdl1	ENSMUSG00000034189
thioredoxin-related transmembrane protein 2 precursor [Mus musculus]	34 kDa	21313210	NP_080144	Tmx2	ENSMUSG00000050043		lysozyme-like protein 4 precursor [Mus musculus]	16 kDa	21312181	NP_081191	Lyzl4	ENSMUSG00000032530		heat shock 70 kDa protein 1B [Mus musculus]	70 kDa	124339826	NP_034608	Hspa1b	ENSMUSG00000090877
transportin-1 isoform 2 [Mus musculus]	101 kDa	115385966	NP_001041732	Tnpo1	ENSMUSG00000009470		lysozyme-like protein 6 precursor [Mus musculus]	17 kDa	58037161	NP_081359	Lyzl6	ENSMUSG00000020945		serine protease HTRA2, mitochondrial [Mus musculus]	49 kDa	254281222	NP_062726	Htra2	ENSMUSG00000068329
torsin-3A precursor [Mus musculus]	44 kDa	224809275	NP_075630	Tor3a	ENSMUSG00000060519		mannosidase 2, alpha 2 [Mus musculus]	93 kDa	27777691	NP_766491	Man2a2	ENSMUSG00000038886		huntingtin [Mus musculus]	345 kDa	45439304	NP_034544	Htt	ENSMUSG00000029104
tumor protein D54 [Mus musculus]	24 kDa	31560247	NP_079758	Tpd52l2	ENSMUSG00000000827		lysosomal alpha-mannosidase precursor [Mus musculus]	115 kDa	113195690	NP_034894	Man2b1	ENSMUSG00000005142		isoamyl acetate-hydrolyzing esterase 1 homolog [Mus musculus]	28 kDa	27754071	NP_080623	Iah1	ENSMUSG00000062054
nuclear pore complex-associated protein Tpr [Mus musculus]	274 kDa	270309140	NP_598541	Tpr	ENSMUSG00000006005		alpha-mannosidase 2C1 [Mus musculus]	116 kDa	30794150	NP_082912	Man2c1	ENSMUSG00000032295		insulin-degrading enzyme [Mus musculus]	118 kDa	121583922	NP_112419	Ide	ENSMUSG00000056999
protein-tyrosine sulfotransferase 2 [Mus musculus]	44 kDa	170172566	NP_033445	Tpst2	ENSMUSG00000029344		beta-mannosidase precursor [Mus musculus]	101 kDa	158533990	NP_081564	Manba	ENSMUSG00000028164		interferon-induced transmembrane protein 3 [Mus musculus]	15 kDa	21539593	NP_079654	Ifitm3	ENSMUSG00000025492
trafficking protein particle complex subunit 10 [Mus musculus]	141 kDa	124486684	NP_001074524	Trappc10	ENSMUSG00000000374		mitochondrial antiviral-signaling protein [Mus musculus]	53 kDa	21450263	NP_659137	Mavs	ENSMUSG00000037523		acetolactate synthase-like protein [Mus musculus]	68 kDa	30424591	NP_776112	Ilvbl	ENSMUSG00000032763
trafficking protein particle complex subunit 5 [Mus musculus]	21 kDa	157266281	NP_079977	Trappc5	ENSMUSG00000040236		malignant T cell-amplified sequence 2 [Mus musculus]	20 kDa	13384966	NP_079819	Mcts2	ENSMUSG00000042814		inositol monophosphatase 3 [Mus musculus]	39 kDa	29244210	NP_808398	Impad1	ENSMUSG00000066324
trafficking protein particle complex subunit 6B [Mus musculus]	18 kDa	58037519	NP_084333	Trappc6b	ENSMUSG00000020993		probable S-adenosyl-L-methionine-dependent methyltransferase METT5D1 [Mus musculus]	45 kDa	27229243	NP_084066	Mettl15	ENSMUSG00000057234		importin-7 [Mus musculus]	119 kDa	74229034	NP_852658	Ipo7	ENSMUSG00000066232
thyroid hormone receptor interactor 11 [Mus musculus]	226 kDa	226531227	NP_082722	Trip11	ENSMUSG00000021188		mitochondrial intermediate peptidase precursor [Mus musculus]	81 kDa	160333185	NP_081712	Mipep	ENSMUSG00000021993		IQ and ubiquitin-like domain-containing protein [Mus musculus]	92 kDa	255683447	NP_766123	Iqub	ENSMUSG00000046192
thiosulfate sulfurtransferase [Mus musculus]	33 kDa	6678449	NP_033463	Tst	ENSMUSG00000044986		myeloid leukemia factor 1 isoform b [Mus musculus]	30 kDa	88196769	NP_034931	Mlf1	ENSMUSG00000048416		immunity-related GTPase family M protein 1 [Mus musculus]	47 kDa	6680351	NP_032352	Irgm1	ENSMUSG00000046879
tubulin alpha-1C chain [Mus musculus]	50 kDa	6678469	NP_033474	Tuba1c	ENSMUSG00000043091		membrane magnesium transporter 1 precursor [Mus musculus]	15 kDa	22122803	NP_666346	Mmgt1	ENSMUSG00000061273		integrin alpha-3 [Mus musculus]	117 kDa	7305189	NP_038593	Itga3	ENSMUSG00000001507
ufm1-specific protease 2 [Mus musculus]	53 kDa	20149754	NP_619609	Ufsp2	ENSMUSG00000031634		MORN repeat-containing protein 5 [Mus musculus]	20 kDa	58037413	NP_083585	Morn5	ENSMUSG00000026894		integrin alpha-V precursor [Mus musculus]	115 kDa	154240716	NP_032428	Itgav	ENSMUSG00000027087
ceramide glucosyltransferase [Mus musculus]	45 kDa	7106443	NP_035803	Ugcg	ENSMUSG00000028381		mpv17-like protein 2 [Mus musculus]	23 kDa	34147205	NP_898993	Mpv17l2	ENSMUSG00000035559		integrin beta-1 precursor [Mus musculus]	88 kDa	45504394	NP_034708	Itgb1	ENSMUSG00000025809
UDP-glucose:glycoprotein glucosyltransferase 2 [Mus musculus]	173 kDa	158749642	NP_001074721	Uggt2	ENSMUSG00000042104		39S ribosomal protein L17, mitochondrial precursor [Mus musculus]	20 kDa	13384658	NP_079577	Mrpl17	ENSMUSG00000030879		inositol 1,4,5-trisphosphate receptor type 1 [Mus musculus]	313 kDa	291327470	NP_034715	Itpr1	ENSMUSG00000030102
UDP-glucuronosyltransferase 1-6 precursor [Mus musculus]	60 kDa	33186906	NP_659545	Ugt1a6a	ENSMUSG00000054545		39S ribosomal protein L18, mitochondrial precursor [Mus musculus]	21 kDa	13385808	NP_080586	Mrpl18	ENSMUSG00000057388		inositol 1,4,5-trisphosphate receptor type 3 [Mus musculus]	304 kDa	61102728	NP_542120	Itpr3	ENSMUSG00000042644
ubiquinol-cytochrome c reductase complex chaperone CBP3 homolog [Mus musculus]	34 kDa	213512915	NP_061376	Uqcc	ENSMUSG00000005882		39S ribosomal protein L43, mitochondrial [Mus musculus]	18 kDa	17298676	NP_444394	Mrpl43	ENSMUSG00000025208		kinesin-1 heavy chain [Mus musculus]	110 kDa	61657921	NP_032474	Kif5b	ENSMUSG00000006740
cytochrome b-c1 complex subunit 9 [Mus musculus]	7 kDa	37574048	NP_932096	Uqcr10	ENSMUSG00000059534		39S ribosomal protein L48, mitochondrial precursor [Mus musculus]	24 kDa	148368964	NP_942128	Mrpl48	ENSMUSG00000030706		importin subunit beta-1 [Mus musculus]	97 kDa	88014720	NP_032405	Kpnb1	ENSMUSG00000001440
ubiquitin carboxyl-terminal hydrolase 30 [Mus musculus]	58 kDa	85986575	NP_001028374	Usp30	ENSMUSG00000029592		39S ribosomal protein L52, mitochondrial precursor [Mus musculus]	14 kDa	30348981	NP_081127	Mrpl52	ENSMUSG00000010406		keratin, type I cytoskeletal 18 [Mus musculus]	48 kDa	254540068	NP_034794	Krt18	ENSMUSG00000023043
vesicle-associated membrane protein 4 [Mus musculus]	16 kDa	31543938	NP_058076	Vamp4	ENSMUSG00000026696		39S ribosomal protein L53, mitochondrial precursor [Mus musculus]	13 kDa	21313040	NP_081020	Mrpl53	ENSMUSG00000030037		keratin, type I cytoskeletal 19 [Mus musculus]	45 kDa	6680606	NP_032497	Krt19	ENSMUSG00000020911
vitamin K epoxide reductase complex subunit 1 [Mus musculus]	18 kDa	30519915	NP_848715	Vkorc1	ENSMUSG00000030804		39S ribosomal protein L55, mitochondrial precursor [Mus musculus]	15 kDa	21313400	NP_080311	Mrpl55	ENSMUSG00000036860		keratin, type I cytoskeletal 27 [Mus musculus]	49 kDa	7106337	NP_034796	Krt27	ENSMUSG00000017588
wolframin [Mus musculus]	101 kDa	6755997	NP_035846	Wfs1	ENSMUSG00000039474		28S ribosomal protein S10, mitochondrial isoform 3 [Mus musculus]	19 kDa	226246598	NP_898909	Mrps10	ENSMUSG00000034729		keratin, type II cytoskeletal 73 [Mus musculus]	59 kDa	47059013	NP_997650	Krt73	ENSMUSG00000063661
WW domain-containing oxidoreductase [Mus musculus]	47 kDa	31980962	NP_062519	Wwox	ENSMUSG00000004637		28S ribosomal protein S14, mitochondrial [Mus musculus]	15 kDa	13384894	NP_079750	Mrps14	ENSMUSG00000058267		keratin, type II cytoskeletal 75 [Mus musculus]	60 kDa	29789317	NP_579935	Krt75	ENSMUSG00000022986
protein YIF1A [Mus musculus]	32 kDa	25282409	NP_080829	Yif1a	ENSMUSG00000024875		28S ribosomal protein S16, mitochondrial precursor [Mus musculus]	15 kDa	13384844	NP_079716	Mrps16	ENSMUSG00000049960		serine beta-lactamase-like protein LACTB, mitochondrial precursor [Mus musculus]	61 kDa	13507666	NP_109642	Lactb	ENSMUSG00000032370
protein YIF1B isoform 1 [Mus musculus]	34 kDa	158937258	NP_084163	Yif1b	ENSMUSG00000030588		28S ribosomal protein S18a, mitochondrial precursor [Mus musculus]	22 kDa	17505206	NP_081044	Mrps18a	ENSMUSG00000023967		beta-lactamase-like protein 2 [Mus musculus]	33 kDa	21703764	NP_663356	Lactb2	ENSMUSG00000025937
zinc-binding alcohol dehydrogenase domain-containing protein 2 [Mus musculus]	41 kDa	31559926	NP_666202	Zadh2	ENSMUSG00000049090		28S ribosomal protein S18b, mitochondrial precursor [Mus musculus]	29 kDa	23956152	NP_080154	Mrps18b	ENSMUSG00000024436		laminin subunit beta-1 [Mus musculus]	202 kDa	114326497	NP_032508	Lamb1	ENSMUSG00000002900
palmitoyltransferase ZDHHC17 [Mus musculus]	73 kDa	283837767	NP_766142	Zdhhc17	ENSMUSG00000035798		28S ribosomal protein S21, mitochondrial [Mus musculus]	11 kDa	17505220	NP_510964	Mrps21	ENSMUSG00000054312		laminin subunit beta-2 precursor [Mus musculus]	197 kDa	31982223	NP_032509	Lamb2	ENSMUSG00000052911
palmitoyltransferase ZDHHC3 [Mus musculus]	34 kDa	27754040	NP_081193	Zdhhc3	ENSMUSG00000025786		28S ribosomal protein S24, mitochondrial precursor [Mus musculus]	19 kDa	13385578	NP_080356	Mrps24	ENSMUSG00000020477		laminin subunit gamma-1 precursor [Mus musculus]	177 kDa	153791270	NP_034813	Lamc1	ENSMUSG00000026478
centromere/kinetochore protein zw10 homolog [Mus musculus]	88 kDa	22165349	NP_036169	Zw10	ENSMUSG00000032264		28S ribosomal protein S31, mitochondrial precursor [Mus musculus]	44 kDa	10181116	NP_065585	Mrps31	ENSMUSG00000031533		mitogen-activated protein-binding protein-interacting protein [Mus musculus]	13 kDa	13752573	NP_112538	Lamtor2	ENSMUSG00000028062
							28S ribosomal protein S36, mitochondrial isoform 1 [Mus musculus]	11 kDa	13384742	NP_079645	Mrps36	ENSMUSG00000061474		mitogen-activated protein kinase scaffold protein 1 [Mus musculus]	14 kDa	9910452	NP_064304	Lamtor3	ENSMUSG00000091512
							28S ribosomal protein S6, mitochondrial [Mus musculus]	14 kDa	23956244	NP_536704	Mrps6	ENSMUSG00000039680		leucyl-tRNA synthetase, cytoplasmic [Mus musculus]	134 kDa	120537241	NP_598898	Lars	ENSMUSG00000024493
							mitochondrial fission protein MTP18 [Mus musculus]	18 kDa	31980939	NP_080719	Mtfp1	ENSMUSG00000004748		probable leucyl-tRNA synthetase, mitochondrial precursor [Mus musculus]	101 kDa	23346617	NP_694808	Lars2	ENSMUSG00000035202
							NADH dehydrogenase subunit 1 [Mus musculus]	36 kDa	34538598	NP_904328	mt-Nd1	ENSMUSG00000064341		LAG1 longevity assurance homolog 2 [Mus musculus]	45 kDa	22095015	NP_084065	Lass2	ENSMUSG00000015714
							metaxin 3 [Mus musculus]	35 kDa	242397501	NP_001156417	Mtx3	ENSMUSG00000021704		LAG1 longevity assurance homolog 6 [Mus musculus]	45 kDa	27370296	NP_766444	Lass6	ENSMUSG00000027035
							C-Myc-binding protein [Mus musculus]	12 kDa	84871978	NP_062634	Mycbp	ENSMUSG00000028647		lysocardiolipin acyltransferase 1 [Mus musculus]	44 kDa	124486722	NP_001074540	Lclat1	ENSMUSG00000054469
							neural cell adhesion molecule 1 isoform 1 [Mus musculus]	93 kDa	124517689	NP_001074914	Ncam1	ENSMUSG00000039542		LETM1 domain-containing protein 1 [Mus musculus]	42 kDa	19527322	NP_598854	Letmd1	ENSMUSG00000037353
							nck-associated protein 1 [Mus musculus]	129 kDa	28395023	NP_058661	Nckap1	ENSMUSG00000027002		galectin-3-binding protein precursor [Mus musculus]	64 kDa	6755144	NP_035280	Lgals3bp	ENSMUSG00000033880
							NADH dehydrogenase [ubiquinone] 1 subunit C2 [Mus musculus]	14 kDa	18859597	NP_077182	Ndufc2	ENSMUSG00000030647		lipoyl synthase, mitochondrial precursor [Mus musculus]	42 kDa	13277380	NP_077791	Lias	ENSMUSG00000029199
							NADH dehydrogenase [ubiquinone] iron-sulfur protein 6, mitochondrial precursor [Mus musculus]	13 kDa	56711244	NP_035018	Ndufs6	ENSMUSG00000021606		PREDICTED: NHP2-like protein 1-like [Mus musculus]	14 kDa	309261987	XP_003085225	LOC100505330
							NIF3-like protein 1 [Mus musculus]	42 kDa	41056093	NP_075364	Nif3l1	ENSMUSG00000026036		lon protease homolog 2, peroxisomal isoform 1 [Mus musculus]	95 kDa	13385298	NP_080103	Lonp2	ENSMUSG00000047866
							nitrilase homolog 1 isoform 1 [Mus musculus]	36 kDa	6754856	NP_036179	Nit1	ENSMUSG00000013997		lysophospholipid acyltransferase 5 [Mus musculus]	56 kDa	21699058	NP_660112	Lpcat3	ENSMUSG00000004270
							Niemann-Pick C1 protein [Mus musculus]	143 kDa	89242146	NP_032746	Npc1	ENSMUSG00000024413		lipopolysaccharide-responsive and beige-like anchor protein isoform beta [Mus musculus]	309 kDa	117956397	NP_001071156	Lrba	ENSMUSG00000028080
							NAD(P)H dehydrogenase [quinone] 1 [Mus musculus]	31 kDa	94400773	NP_032732	Nqo1	ENSMUSG00000003849		prolow-density lipoprotein receptor-related protein 1 [Mus musculus]	505 kDa	124494256	NP_032538	Lrp1	ENSMUSG00000040249
							nardilysin precursor [Mus musculus]	133 kDa	31559918	NP_666262	Nrd1	ENSMUSG00000053510		lanosterol synthase [Mus musculus]	83 kDa	22122469	NP_666118	Lss	ENSMUSG00000033105
							outer dense fiber protein 2 isoform f [Mus musculus]	73 kDa	295054201	NP_001171133	Odf2	ENSMUSG00000026790		lysozyme-like protein 6 precursor [Mus musculus]	17 kDa	58037161	NP_081359	Lyzl6	ENSMUSG00000020945
							outer dense fiber protein 3-like protein 1 [Mus musculus]	31 kDa	38348576	NP_941075	Odf3l1	ENSMUSG00000045620		mannosyl-oligosaccharide 1,2-alpha-mannosidase IA [Mus musculus]	73 kDa	6678788	NP_032574	Man1a	ENSMUSG00000003746
							5-oxoprolinase [Mus musculus]	138 kDa	23346557	NP_694762	Oplah	ENSMUSG00000022562		mannosidase 2, alpha 2 [Mus musculus]	93 kDa	27777691	NP_766491	Man2a2	ENSMUSG00000038886
							poly(rC)-binding protein 1 [Mus musculus]	37 kDa	6754994	NP_035995	Pcbp1	ENSMUSG00000051695		amine oxidase [flavin-containing] B [Mus musculus]	59 kDa	257196228	NP_766366	Maob	ENSMUSG00000040147
							programmed cell death 6-interacting protein isoform 1 [Mus musculus]	97 kDa	258547152	NP_001158149	Pdcd6ip	ENSMUSG00000032504		mitochondrial antiviral-signaling protein [Mus musculus]	53 kDa	21450263	NP_659137	Mavs	ENSMUSG00000037523
							peflin [Mus musculus]	29 kDa	31980937	NP_080717	Pef1	ENSMUSG00000028779		mitochondrial carrier triple repeat protein 1 [Mus musculus]	34 kDa	294610683	NP_001009949	Mcart1	ENSMUSG00000045973
							peroxisome biogenesis factor 10 [Mus musculus]	37 kDa	109150414	NP_001035866	Pex10	ENSMUSG00000029047		LDLR chaperone MESD [Mus musculus]	25 kDa	228480219	NP_075892	Mesdc2	ENSMUSG00000038503
							6-phosphofructokinase, muscle type [Mus musculus]	85 kDa	254553344	NP_067489	Pfkm	ENSMUSG00000033065		probable S-adenosyl-L-methionine-dependent methyltransferase METT5D1 [Mus musculus]	45 kDa	27229243	NP_084066	Mettl15	ENSMUSG00000057234
							profilin-3 [Mus musculus]	15 kDa	21312794	NP_083579	Pfn3	ENSMUSG00000044444		mitofusin-1 [Mus musculus]	84 kDa	244793488	NP_077162	Mfn1	ENSMUSG00000027668
							phosphoglycerate mutase 2 [Mus musculus]	29 kDa	9256624	NP_061358	Pgam2	ENSMUSG00000020475		microsomal glutathione S-transferase 1 [Mus musculus]	18 kDa	31981068	NP_064330	Mgst1	ENSMUSG00000008540
							phosphoglycerate kinase 2 [Mus musculus]	45 kDa	226246531	NP_112467	Pgk2	ENSMUSG00000031233		melanoma inhibitory activity protein 3 precursor [Mus musculus]	214 kDa	124001582	NP_796363	Mia3	ENSMUSG00000056050
							6-phosphogluconolactonase [Mus musculus]	27 kDa	13384778	NP_079672	Pgls	ENSMUSG00000031807		mitochondrial intermediate peptidase precursor [Mus musculus]	81 kDa	160333185	NP_081712	Mipep	ENSMUSG00000021993
							prohibitin-like [Mus musculus]	29 kDa	85702063	NP_001028937	Phb	ENSMUSG00000038845		methylmalonic aciduria type A homolog, mitochondrial precursor [Mus musculus]	46 kDa	31541923	NP_598584	Mmaa	ENSMUSG00000037022
							phosphatidylinositol transfer protein beta isoform [Mus musculus]	31 kDa	9790159	NP_062614	Pitpnb	ENSMUSG00000050017		membrane magnesium transporter 1 precursor [Mus musculus]	15 kDa	22122803	NP_666346	Mmgt1	ENSMUSG00000061273
							phospholipase B1, membrane-associated isoform 1 [Mus musculus]	165 kDa	124487227	NP_001074876	Plb1	ENSMUSG00000029134		motile sperm domain-containing protein 2 [Mus musculus]	60 kDa	167234396	NP_084006	Mospd2	ENSMUSG00000061778
							perilipin-3 [Mus musculus]	47 kDa	13385312	NP_080112	Plin3	ENSMUSG00000024197		mpv17-like protein 2 [Mus musculus]	23 kDa	34147205	NP_898993	Mpv17l2	ENSMUSG00000035559
							phosphomannomutase 2 [Mus musculus]	28 kDa	8393988	NP_058577	Pmm2	ENSMUSG00000022711		39S ribosomal protein L1, mitochondrial isoform 1 [Mus musculus]	38 kDa	84875528	NP_444388	Mrpl1	ENSMUSG00000029486
							probable hydrolase PNKD isoform 3 [Mus musculus]	43 kDa	87239984	NP_001034598	Pnkd	ENSMUSG00000026179		39S ribosomal protein L10, mitochondrial precursor [Mus musculus]	29 kDa	13385658	NP_080430	Mrpl10	ENSMUSG00000001445
							lipid phosphate phosphohydrolase 1 isoform 1 [Mus musculus]	32 kDa	45592928	NP_032273	Ppap2a	ENSMUSG00000021759		39S ribosomal protein L15, mitochondrial isoform 1 precursor [Mus musculus]	34 kDa	295054166	NP_001171129	Mrpl15	ENSMUSG00000033845
							peptidyl-prolyl cis-trans isomerase-like 6 [Mus musculus]	36 kDa	162329596	NP_082706	Ppil6	ENSMUSG00000078451		39S ribosomal protein L17, mitochondrial precursor [Mus musculus]	20 kDa	13384658	NP_079577	Mrpl17	ENSMUSG00000030879
							serine/threonine-protein phosphatase 2A 65 kDa regulatory subunit A beta isoform isoform a [Mus musculus]	73 kDa	77539770	NP_001029257	Ppp2r1b	ENSMUSG00000032058		39S ribosomal protein L18, mitochondrial precursor [Mus musculus]	21 kDa	13385808	NP_080586	Mrpl18	ENSMUSG00000057388
							calcineurin subunit B type 2 [Mus musculus]	21 kDa	51591899	NP_001004025	Ppp3r2	ENSMUSG00000028310		39S ribosomal protein L19, mitochondrial precursor [Mus musculus]	34 kDa	13385976	NP_080766	Mrpl19	ENSMUSG00000030045
							serine/threonine-protein phosphatase 6 catalytic subunit [Mus musculus]	35 kDa	21312758	NP_077171	Ppp6c	ENSMUSG00000026753		39S ribosomal protein L2, mitochondrial precursor [Mus musculus]	33 kDa	13384660	NP_079578	Mrpl2	ENSMUSG00000002767
							cAMP-dependent protein kinase catalytic subunit alpha [Mus musculus]	41 kDa	7110693	NP_032880	Prkaca	ENSMUSG00000005469		39S ribosomal protein L20, mitochondrial precursor [Mus musculus]	18 kDa	20270194	NP_079846	Mrpl20	ENSMUSG00000029066
							cAMP-dependent protein kinase catalytic subunit beta isoform 4 [Mus musculus]	46 kDa	255958156	NP_001157672	Prkacb	ENSMUSG00000005034		39S ribosomal protein L21, mitochondrial [Mus musculus]	24 kDa	31982032	NP_758456	Mrpl21	ENSMUSG00000024829
							cAMP-dependent protein kinase type I-alpha regulatory subunit [Mus musculus]	43 kDa	30794476	NP_068680	Prkar1a	ENSMUSG00000020612		39S ribosomal protein L28, mitochondrial precursor [Mus musculus]	30 kDa	26787989	NP_077189	Mrpl28	ENSMUSG00000024181
							inactive serine protease 39 precursor [Mus musculus]	41 kDa	6678293	NP_033381	Prss39	ENSMUSG00000026125		39S ribosomal protein L3, mitochondrial [Mus musculus]	39 kDa	31981470	NP_444389	Mrpl3	ENSMUSG00000032563
							inactive serine protease 45 precursor [Mus musculus]	36 kDa	23346626	NP_694812	Prss45	ENSMUSG00000047257		39S ribosomal protein L30, mitochondrial precursor [Mus musculus]	18 kDa	21312302	NP_081374	Mrpl30	ENSMUSG00000026087
							protease, serine, 46 [Mus musculus]	35 kDa	295444814	NP_898926	Prss46	ENSMUSG00000049719		39S ribosomal protein L32, mitochondrial precursor [Mus musculus]	22 kDa	21312948	NP_083547	Mrpl32	ENSMUSG00000015672
							serine protease 52 precursor [Mus musculus]	36 kDa	117676359	NP_082801	Prss52	ENSMUSG00000021966		39S ribosomal protein L37, mitochondrial precursor [Mus musculus]	48 kDa	22128625	NP_079776	Mrpl37	ENSMUSG00000028622
							PREDICTED: phosphoserine aminotransferase-like isoform 2 [Mus musculus]	41 kDa	309266230	XP_001478041	Psat1	ENSMUSG00000024640		39S ribosomal protein L38, mitochondrial precursor [Mus musculus]	45 kDa	124430535	NP_077139	Mrpl38	ENSMUSG00000020775
							presenilin-1 [Mus musculus]	53 kDa	6679493	NP_032969	Psen1	ENSMUSG00000019969		39S ribosomal protein L39, mitochondrial [Mus musculus]	35 kDa	31560438	NP_059100	Mrpl39	ENSMUSG00000022889
							proteasome subunit alpha type-1 [Mus musculus]	30 kDa	33563282	NP_036095	Psma1	ENSMUSG00000030751		39S ribosomal protein L4, mitochondrial [Mus musculus]	33 kDa	119508437	NP_075656	Mrpl4	ENSMUSG00000003299
							proteasome subunit alpha type-3 [Mus musculus]	28 kDa	261824000	NP_035314	Psma3	ENSMUSG00000060073		39S ribosomal protein L43, mitochondrial [Mus musculus]	18 kDa	17298676	NP_444394	Mrpl43	ENSMUSG00000025208
							proteasome subunit alpha type-4 [Mus musculus]	29 kDa	6755196	NP_036096	Psma4	ENSMUSG00000032301		39S ribosomal protein L44, mitochondrial precursor [Mus musculus]	38 kDa	124487075	NP_001074679	Mrpl44	ENSMUSG00000026248
							proteasome subunit alpha type-6 [Mus musculus]	27 kDa	6755198	NP_036098	Psma6	ENSMUSG00000021024		39S ribosomal protein L45, mitochondrial precursor [Mus musculus]	35 kDa	13385418	NP_080203	Mrpl45	ENSMUSG00000018882
							proteasome subunit alpha type-7 [Mus musculus]	28 kDa	7106389	NP_036099	Psma7	ENSMUSG00000027566		39S ribosomal protein L48, mitochondrial precursor [Mus musculus]	24 kDa	148368964	NP_942128	Mrpl48	ENSMUSG00000030706
							proteasome subunit beta type-5 [Mus musculus]	29 kDa	6755204	NP_035316	Psmb5	ENSMUSG00000022193		39S ribosomal protein L50, mitochondrial [Mus musculus]	18 kDa	30519921	NP_848718	Mrpl50	ENSMUSG00000044018
							proteasome subunit beta type-6 precursor [Mus musculus]	25 kDa	238231384	NP_032972	Psmb6	ENSMUSG00000018286		39S ribosomal protein L52, mitochondrial precursor [Mus musculus]	14 kDa	30348981	NP_081127	Mrpl52	ENSMUSG00000010406
							26S proteasome non-ATPase regulatory subunit 1 [Mus musculus]	106 kDa	74315975	NP_081633	Psmd1	ENSMUSG00000026229		28S ribosomal protein S11, mitochondrial precursor [Mus musculus]	20 kDa	170650663	NP_080774	Mrps11	ENSMUSG00000030611
							26S proteasome non-ATPase regulatory subunit 2 [Mus musculus]	100 kDa	19882201	NP_598862	Psmd2	ENSMUSG00000006998		28S ribosomal protein S14, mitochondrial [Mus musculus]	15 kDa	13384894	NP_079750	Mrps14	ENSMUSG00000058267
							26S proteasome non-ATPase regulatory subunit 6 [Mus musculus]	46 kDa	46049022	NP_079826	Psmd6	ENSMUSG00000021737		28S ribosomal protein S15, mitochondrial precursor [Mus musculus]	29 kDa	48526512	NP_079820	Mrps15	ENSMUSG00000028861
							26S proteasome non-ATPase regulatory subunit 7 [Mus musculus]	37 kDa	6754724	NP_034947	Psmd7	ENSMUSG00000039067		28S ribosomal protein S16, mitochondrial precursor [Mus musculus]	15 kDa	13384844	NP_079716	Mrps16	ENSMUSG00000049960
							proteasome activator complex subunit 1 [Mus musculus]	29 kDa	6755212	NP_035319	Psme1	ENSMUSG00000022216		28S ribosomal protein S17, mitochondrial precursor [Mus musculus]	13 kDa	13384854	NP_079726	Mrps17	ENSMUSG00000034211
							proteasome activator complex subunit 2 isoform 1 [Mus musculus]	27 kDa	20137004	NP_035320	Psme2	ENSMUSG00000079197		28S ribosomal protein S18a, mitochondrial precursor [Mus musculus]	22 kDa	17505206	NP_081044	Mrps18a	ENSMUSG00000023967
							proteasome activator complex subunit 4 [Mus musculus]	211 kDa	117956381	NP_598774	Psme4	ENSMUSG00000040850		28S ribosomal protein S18b, mitochondrial precursor [Mus musculus]	29 kDa	23956152	NP_080154	Mrps18b	ENSMUSG00000024436
							proteasome assembly chaperone 1 [Mus musculus]	33 kDa	9506555	NP_062410	Psmg1	ENSMUSG00000022913		28S ribosomal protein S21, mitochondrial [Mus musculus]	11 kDa	17505220	NP_510964	Mrps21	ENSMUSG00000054312
							proteasome assembly chaperone 2 [Mus musculus]	30 kDa	19527372	NP_598899	Psmg2	ENSMUSG00000024537		28S ribosomal protein S22, mitochondrial [Mus musculus]	41 kDa	13384904	NP_079761	Mrps22	ENSMUSG00000032459
							pentatricopeptide repeat-containing protein 2 [Mus musculus]	44 kDa	58037131	NP_081149	Ptcd2	ENSMUSG00000021650		28S ribosomal protein S24, mitochondrial precursor [Mus musculus]	19 kDa	13385578	NP_080356	Mrps24	ENSMUSG00000020477
							prostaglandin E synthase [Mus musculus]	17 kDa	11967941	NP_071860	Ptges	ENSMUSG00000050737		28S ribosomal protein S25, mitochondrial [Mus musculus]	20 kDa	31981257	NP_079854	Mrps25	ENSMUSG00000014551
							PREDICTED: prostaglandin E synthase 3-like [Mus musculus]	19 kDa	149255313	XP_001480119	Ptges3	ENSMUSG00000071072		28S ribosomal protein S27, mitochondrial [Mus musculus]	48 kDa	50980303	NP_776118	Mrps27	ENSMUSG00000041632
							protein tyrosine phosphatase type IVA 2 [Mus musculus]	19 kDa	258613926	NP_001158217	Ptp4a2	ENSMUSG00000028788		28S ribosomal protein S28, mitochondrial [Mus musculus]	21 kDa	254587936	NP_079710	Mrps28	ENSMUSG00000040269
							peroxisomal membrane protein 4 [Mus musculus]	24 kDa	10946966	NP_067509	Pxmp4	ENSMUSG00000000876		28S ribosomal protein S30, mitochondrial [Mus musculus]	50 kDa	29789128	NP_067531	Mrps30	ENSMUSG00000021731
							rab3 GTPase-activating protein non-catalytic subunit [Mus musculus]	155 kDa	255003810	NP_001157226	Rab3gap2	ENSMUSG00000039318		28S ribosomal protein S31, mitochondrial precursor [Mus musculus]	44 kDa	10181116	NP_065585	Mrps31	ENSMUSG00000031533
							ras-related C3 botulinum toxin substrate 2 precursor [Mus musculus]	21 kDa	6679601	NP_033034	Rac2	ENSMUSG00000033220		28S ribosomal protein S33, mitochondrial isoform 1 [Mus musculus]	12 kDa	33859564	NP_034400	Mrps33	ENSMUSG00000029918
							ran guanine nucleotide release factor [Mus musculus]	20 kDa	10946640	NP_067304	Rangrf	ENSMUSG00000032892		28S ribosomal protein S34, mitochondrial [Mus musculus]	26 kDa	13385670	NP_075749	Mrps34	ENSMUSG00000038880
							retinol dehydrogenase 1 (all trans) [Mus musculus]	36 kDa	165377241	NP_536684	Rdh1	ENSMUSG00000089789		28S ribosomal protein S35, mitochondrial precursor [Mus musculus]	36 kDa	148235701	NP_663548	Mrps35	ENSMUSG00000040112
							retinol dehydrogenase 13 [Mus musculus]	36 kDa	30425078	NP_780581	Rdh13	ENSMUSG00000008435		28S ribosomal protein S36, mitochondrial isoform 1 [Mus musculus]	11 kDa	13384742	NP_079645	Mrps36	ENSMUSG00000061474
							retinol dehydrogenase 9 [Mus musculus]	36 kDa	23680945	NP_694773	Rdh9	ENSMUSG00000056148		28S ribosomal protein S6, mitochondrial [Mus musculus]	14 kDa	23956244	NP_536704	Mrps6	ENSMUSG00000039680
							radixin isoform a [Mus musculus]	69 kDa	157277948	NP_033067	Rdx	ENSMUSG00000032050		28S ribosomal protein S9, mitochondrial precursor [Mus musculus]	45 kDa	169790909	NP_076003	Mrps9	ENSMUSG00000060679
							ATP-dependent DNA helicase Q1 [Mus musculus]	72 kDa	110625690	NP_075529	Recql	ENSMUSG00000030243		mitochondrial GTPase 1 precursor [Mus musculus]	37 kDa	188528646	NP_955005	Mtg1	ENSMUSG00000039018
							RIB43A-like with coiled-coils protein 2 [Mus musculus]	45 kDa	241666436	NP_080633	Ribc2	ENSMUSG00000022431		translation initiation factor IF-2, mitochondrial precursor [Mus musculus]	81 kDa	110625866	NP_598528	Mtif2	ENSMUSG00000020459
							ribose-5-phosphate isomerase [Mus musculus]	32 kDa	94536844	NP_033101	Rpia	ENSMUSG00000053604		serine/threonine-protein kinase mTOR [Mus musculus]	289 kDa	227330586	NP_064393	Mtor	ENSMUSG00000028991
							60S ribosomal protein L37a [Mus musculus]	10 kDa	6677785	NP_033110	Rpl37a	ENSMUSG00000046330		poly(A) RNA polymerase, mitochondrial precursor [Mus musculus]	65 kDa	21312970	NP_080433	Mtpap	ENSMUSG00000024234
							60S ribosomal protein L5 [Mus musculus]	34 kDa	23956082	NP_058676	Rpl5	ENSMUSG00000058558		microsomal triglyceride transfer protein large subunit isoform 1 [Mus musculus]	101 kDa	254540023	NP_001156929	Mttp	ENSMUSG00000028158
							60S ribosomal protein L9 [Mus musculus]	22 kDa	14149647	NP_035422	Rpl9-ps4	ENSMUSG00000071269		metaxin 3 [Mus musculus]	35 kDa	242397501	NP_001156417	Mtx3	ENSMUSG00000021704
							60S acidic ribosomal protein P2 [Mus musculus]	12 kDa	83745120	NP_080296	Rplp2	ENSMUSG00000025508		mucin 5, subtype B, tracheobronchial [Mus musculus]	515 kDa	147905740	NP_083077	Muc5b	ENSMUSG00000066108
							40S ribosomal protein S10 [Mus musculus]	19 kDa	13399310	NP_080239	Rps10	ENSMUSG00000052146		mitochondrial ubiquitin ligase activator of NFKB 1 [Mus musculus]	40 kDa	31541787	NP_080965	Mul1	ENSMUSG00000041241
							40S ribosomal protein S13 [Mus musculus]	17 kDa	13386034	NP_080809	Rps13	ENSMUSG00000090862		major vault protein [Mus musculus]	97 kDa	239052674	NP_542369	Mvp	ENSMUSG00000030681
							40S ribosomal protein S19 [Mus musculus]	16 kDa	12963511	NP_075622	Rps19	ENSMUSG00000040952		probable E3 ubiquitin-protein ligase MYCBP2 [Mus musculus]	521 kDa	127141012	NP_997098	Mycbp2	ENSMUSG00000033004
							40S ribosomal protein S26 [Mus musculus]	13 kDa	255003793	NP_038793	Rps26	ENSMUSG00000025362		myosin-14 [Mus musculus]	228 kDa	29336026	NP_082297	Myh14	ENSMUSG00000030739
							40S ribosomal protein S27 [Mus musculus]	9 kDa	26024336	NP_081291	Rps27	ENSMUSG00000090733		myosin light polypeptide 6 [Mus musculus]	17 kDa	33620739	NP_034990	Myl6	ENSMUSG00000090841
							ribosome-binding protein 1 isoform a [Mus musculus]	158 kDa	124486712	NP_077243	Rrbp1	ENSMUSG00000027422		myosin-Vb [Mus musculus]	211 kDa	46399202	NP_963894	Myo5b	ENSMUSG00000025885
							radial spoke head 1 homolog [Mus musculus]	34 kDa	13384638	NP_079566	Rsph1	ENSMUSG00000024033		gamma-soluble NSF attachment protein [Mus musculus]	35 kDa	110625902	NP_082293	Napg	ENSMUSG00000024581
							radial spoke head protein 3 homolog B [Mus musculus]	45 kDa	153791341	NP_001077414	Rsph3b	ENSMUSG00000023806		neural cell adhesion molecule 1 isoform 1 [Mus musculus]	93 kDa	124517689	NP_001074914	Ncam1	ENSMUSG00000039542
							ribosome maturation protein SBDS [Mus musculus]	29 kDa	23956138	NP_075737	Sbds	ENSMUSG00000025337		nck-associated protein 1 [Mus musculus]	129 kDa	28395023	NP_058661	Nckap1	ENSMUSG00000027002
							lysosome membrane protein 2 [Mus musculus]	54 kDa	6680878	NP_031670	Scarb2	ENSMUSG00000029426		nicalin precursor [Mus musculus]	63 kDa	33469043	NP_598770	Ncln	ENSMUSG00000020238
							protein SCO1 homolog, mitochondrial precursor [Mus musculus]	32 kDa	90991710	NP_001035115	Sco1	ENSMUSG00000069844		NADH dehydrogenase [ubiquinone] 1 alpha subcomplex subunit 3 [Mus musculus]	9 kDa	21539587	NP_079624	Ndufa3	ENSMUSG00000035674
							succinate dehydrogenase cytochrome b560 subunit, mitochondrial precursor [Mus musculus]	18 kDa	228008307	NP_079597	Sdhc	ENSMUSG00000058076		NADH dehydrogenase [ubiquinone] 1 alpha subcomplex subunit 7 [Mus musculus]	13 kDa	12963571	NP_075691	Ndufa7	ENSMUSG00000041881
							vesicle-trafficking protein SEC22a [Mus musculus]	35 kDa	27819645	NP_598465	Sec22a	ENSMUSG00000034473		NADH dehydrogenase [ubiquinone] flavoprotein 3, mitochondrial isoform 1 [Mus musculus]	50 kDa	140972309	NP_084363	Ndufv3	ENSMUSG00000024038
							SEC23-interacting protein [Mus musculus]	111 kDa	254692911	NP_001025153	Sec23ip	ENSMUSG00000055319		NHL repeat-containing protein 3 precursor [Mus musculus]	38 kDa	27369692	NP_766089	Nhlrc3	ENSMUSG00000042997
							septin-4 [Mus musculus]	55 kDa	6755120	NP_035259	Sep4	ENSMUSG00000020486		NIF3-like protein 1 [Mus musculus]	42 kDa	41056093	NP_075364	Nif3l1	ENSMUSG00000026036
							septin-12 [Mus musculus]	36 kDa	21312734	NP_081945	Sept12	ENSMUSG00000022542		omega-amidase NIT2 [Mus musculus]	31 kDa	12963555	NP_075664	Nit2	ENSMUSG00000022751
							alpha-1-antitrypsin 1-6 isoform 1 precursor [Mus musculus]	46 kDa	259906395	NP_080963	Serpina1f	ENSMUSG00000021081		nucleoside diphosphate kinase 3 [Mus musculus]	19 kDa	255308888	NP_062704	Nme3	ENSMUSG00000073435
							sialoadhesin [Mus musculus]	184 kDa	226958332	NP_035556	Siglec1	ENSMUSG00000027322		nicotinamide mononucleotide adenylyltransferase 3 [Mus musculus]	28 kDa	21362329	NP_653116	Nmnat3	ENSMUSG00000032456
							NAD-dependent deacetylase sirtuin-5 [Mus musculus]	34 kDa	30578432	NP_849179	Sirt5	ENSMUSG00000054021		Niemann-Pick C1 protein [Mus musculus]	143 kDa	89242146	NP_032746	Npc1	ENSMUSG00000024413
							solute carrier family 12 member 9 [Mus musculus]	96 kDa	281371456	NP_113583	Slc12a9	ENSMUSG00000037344		puromycin-sensitive aminopeptidase [Mus musculus]	103 kDa	68226731	NP_032968	Npepps	ENSMUSG00000001441
							monocarboxylate transporter 1 [Mus musculus]	53 kDa	6677995	NP_033222	Slc16a1	ENSMUSG00000032902		NAD(P)H dehydrogenase [quinone] 1 [Mus musculus]	31 kDa	94400773	NP_032732	Nqo1	ENSMUSG00000003849
							monocarboxylate transporter 2 [Mus musculus]	53 kDa	6755536	NP_035521	Slc16a7	ENSMUSG00000020102		peroxisomal NADH pyrophosphatase NUDT12 [Mus musculus]	52 kDa	21312664	NP_080773	Nudt12	ENSMUSG00000024228
							solute carrier family 25 member 33 [Mus musculus]	35 kDa	117647275	NP_081736	Slc25a33	ENSMUSG00000028982		bis(5'-nucleosyl)-tetraphosphatase [asymmetrical] [Mus musculus]	17 kDa	86198335	NP_079815	Nudt2	ENSMUSG00000028443
							solute carrier family 25 member 44 isoform a [Mus musculus]	37 kDa	225007568	NP_848811	Slc25a44	ENSMUSG00000050144		peroxisomal coenzyme A diphosphatase NUDT7 isoform 1 [Mus musculus]	27 kDa	165972342	NP_077757	Nudt7	ENSMUSG00000031767
							solute carrier family 2, facilitated glucose transporter member 5 [Mus musculus]	55 kDa	31543728	NP_062715	Slc2a5	ENSMUSG00000028976		nucleoporin 205 [Mus musculus]	227 kDa	226437676	NP_081789	Nup205	ENSMUSG00000038759
							solute carrier family 35 member F2 [Mus musculus]	42 kDa	160333206	NP_082336	Slc35f2	ENSMUSG00000042195		nuclear pore membrane glycoprotein 210 precursor [Mus musculus]	204 kDa	172073152	NP_061285	Nup210	ENSMUSG00000030091
							riboflavin transporter 2 isoform 1 precursor [Mus musculus]	50 kDa	258679445	NP_081448	Slc52a3	ENSMUSG00000027463		outer dense fiber protein 3-like protein 1 [Mus musculus]	31 kDa	38348576	NP_941075	Odf3l1	ENSMUSG00000045620
							staphylococcal nuclease domain-containing protein 1 [Mus musculus]	102 kDa	77404392	NP_062750	Snd1	ENSMUSG00000001424		dynamin-like 120 kDa protein, mitochondrial precursor [Mus musculus]	111 kDa	19526960	NP_598513	Opa1	ENSMUSG00000038084
							sorting nexin-1 [Mus musculus]	59 kDa	71043944	NP_062701	Snx1	ENSMUSG00000032382		optic atrophy 3 protein homolog [Mus musculus]	20 kDa	110625722	NP_997408	Opa3	ENSMUSG00000052214
							sorbitol dehydrogenase [Mus musculus]	38 kDa	22128627	NP_666238	Sord	ENSMUSG00000027227		oxidoreductase NAD-binding domain-containing protein 1 precursor [Mus musculus]	35 kDa	170932556	NP_663435	Oxnad1	ENSMUSG00000021906
							sperm acrosome membrane-associated protein 3 [Mus musculus]	18 kDa	110626054	NP_083643	Spaca3	ENSMUSG00000053184		pterin-4-alpha-carbinolamine dehydratase 2 [Mus musculus]	15 kDa	52421794	NP_082557	Pcbd2	ENSMUSG00000021496
							sperm acrosome-associated protein 5 precursor [Mus musculus]	18 kDa	145966885	NP_001078862	Spaca5	ENSMUSG00000037167		poly(rC)-binding protein 1 [Mus musculus]	37 kDa	6754994	NP_035995	Pcbp1	ENSMUSG00000051695
							hyaluronidase PH-20 precursor [Mus musculus]	58 kDa	120407035	NP_001073344	Spam1	ENSMUSG00000029682		programmed cell death 6-interacting protein isoform 1 [Mus musculus]	97 kDa	258547152	NP_001158149	Pdcd6ip	ENSMUSG00000032504
							spermatogenesis-associated protein 20 [Mus musculus]	88 kDa	46485467	NP_659076	Spata20	ENSMUSG00000020867		protein disulfide-isomerase A5 precursor [Mus musculus]	59 kDa	30794140	NP_082571	Pdia5	ENSMUSG00000022844
							spermatogenesis-associated protein 6 precursor [Mus musculus]	56 kDa	110347525	NP_080746	Spata6	ENSMUSG00000034401		[Pyruvate dehydrogenase [lipoamide]] kinase isozyme 1, mitochondrial precursor [Mus musculus]	49 kDa	110625975	NP_766253	Pdk1	ENSMUSG00000006494
							speriolin [Mus musculus]	51 kDa	58037363	NP_083128	Spatc1	ENSMUSG00000049653		peroxisomal trans-2-enoyl-CoA reductase [Mus musculus]	32 kDa	227908837	NP_076012	Pecr	ENSMUSG00000026189
							spatacsin [Mus musculus]	274 kDa	226958532	NP_663506	Spg11	ENSMUSG00000033396		peflin [Mus musculus]	29 kDa	31980937	NP_080717	Pef1	ENSMUSG00000028779
							paraplegin [Mus musculus]	86 kDa	148539988	NP_694816	Spg7	ENSMUSG00000000738		peroxisome biogenesis factor 1 [Mus musculus]	137 kDa	61657895	NP_082053	Pex1	ENSMUSG00000005907
							serine protease inhibitor Kazal-type 8 precursor [Mus musculus]	12 kDa	114145596	NP_898959	Spink8	ENSMUSG00000050074		peroxisome biogenesis factor 10 [Mus musculus]	37 kDa	109150414	NP_001035866	Pex10	ENSMUSG00000029047
							kunitz-type protease inhibitor 4 precursor [Mus musculus]	18 kDa	33942057	NP_084334	Spint4	ENSMUSG00000017310		peroxisomal membrane protein 11B isoform 1 [Mus musculus]	29 kDa	241666481	NP_035199	Pex11b	ENSMUSG00000028102
							spectrin beta chain, brain 2 [Mus musculus]	271 kDa	55926127	NP_067262	Spnb3	ENSMUSG00000067889		peroxisome assembly factor 2 [Mus musculus]	105 kDa	21703962	NP_663463	Pex6	ENSMUSG00000002763
							stAR-related lipid transfer protein 6 [Mus musculus]	26 kDa	21312812	NP_083295	Stard6	ENSMUSG00000079608		post-GPI attachment to proteins factor 2 [Mus musculus]	29 kDa	21704172	NP_663558	Pgap2	ENSMUSG00000030990
							syntaxin-17 [Mus musculus]	33 kDa	84579893	NP_080619	Stx17	ENSMUSG00000061455		6-phosphogluconolactonase [Mus musculus]	27 kDa	13384778	NP_079672	Pgls	ENSMUSG00000031807
							serine/threonine/tyrosine-interacting-like protein 1 [Mus musculus]	21 kDa	15805022	NP_083935	Styxl1	ENSMUSG00000019178		CDP-diacylglycerol--glycerol-3-phosphate 3-phosphatidyltransferase, mitochondrial [Mus musculus]	62 kDa	110626163	NP_598518	Pgs1	ENSMUSG00000017715
							nesprin-2 [Mus musculus]	783 kDa	145699091	NP_001005510	Syne2	ENSMUSG00000063450		D-3-phosphoglycerate dehydrogenase [Mus musculus]	57 kDa	52353955	NP_058662	Phgdh	ENSMUSG00000053398
							threonine aspartase 1 isoform a [Mus musculus]	44 kDa	227496381	NP_001153112	Tasp1	ENSMUSG00000039033		phosphatidylinositol 4-kinase type 3 alpha [Mus musculus]	231 kDa	241982771	NP_001001983	Pi4ka	ENSMUSG00000041720
							transcription elongation factor B polypeptide 2 [Mus musculus]	13 kDa	13385800	NP_080581	Tceb2	ENSMUSG00000055839		GPI ethanolamine phosphate transferase 2 [Mus musculus]	108 kDa	124486987	NP_001074703	Pigg	ENSMUSG00000029263
							T-complex protein 1 subunit alpha [Mus musculus]	60 kDa	110625624	NP_038714	Tcp1	ENSMUSG00000068039		GPI transamidase component PIG-S [Mus musculus]	62 kDa	41351529	NP_958808	Pigs	ENSMUSG00000041958
							t-complex protein 10c [Mus musculus]	49 kDa	130497908	NP_033367	Tcp10b	ENSMUSG00000055602		GPI transamidase component PIG-T precursor [Mus musculus]	66 kDa	120587021	NP_598540	Pigt	ENSMUSG00000017721
							testicular haploid expressed gene product isoform 1 [Mus musculus]	43 kDa	33859638	NP_035713	Theg	ENSMUSG00000020317		phosphatidylinositol transfer protein beta isoform [Mus musculus]	31 kDa	9790159	NP_062614	Pitpnb	ENSMUSG00000050017
							mitochondrial import inner membrane translocase subunit Tim8 A [Mus musculus]	11 kDa	7305577	NP_038926	Timm8a1	ENSMUSG00000048007		group XIIA secretory phospholipase A2 isoform 1 [Mus musculus]	21 kDa	170295846	NP_075685	Pla2g12a	ENSMUSG00000027999
							transketolase [Mus musculus]	68 kDa	6678359	NP_033414	Tkt	ENSMUSG00000021957		putative phospholipase B-like 2 [Mus musculus]	66 kDa	31560090	NP_076114	Plbd2	ENSMUSG00000029598
							transmembrane and coiled-coil domain-containing protein 2 [Mus musculus]	21 kDa	124486795	NP_001074781	Tmco2	ENSMUSG00000078577		plectin isoform 12alpha [Mus musculus]	534 kDa	254675115	NP_001157012	Plec	ENSMUSG00000022565
							transmembrane protein 11 isoform 1 [Mus musculus]	21 kDa	27734998	NP_775655	Tmem11	ENSMUSG00000043284		perilipin-3 [Mus musculus]	47 kDa	13385312	NP_080112	Plin3	ENSMUSG00000024197
							transmembrane protein 186 [Mus musculus]	25 kDa	27228988	NP_079984	Tmem186	ENSMUSG00000043140		plexin B2 [Mus musculus]	206 kDa	226958474	NP_620088	Plxnb2	ENSMUSG00000036606
							transmembrane protein 190 precursor [Mus musculus]	18 kDa	254675164	NP_084304	Tmem190	ENSMUSG00000013091		melanocyte protein Pmel 17 precursor [Mus musculus]	66 kDa	31981217	NP_068682	Pmel	ENSMUSG00000025359
							transmembrane protein 192 isoform 2 [Mus musculus]	25 kDa	254939603	NP_001157219	Tmem192	ENSMUSG00000025521		phosphomannomutase 2 [Mus musculus]	28 kDa	8393988	NP_058577	Pmm2	ENSMUSG00000022711
							transmembrane protein 43 [Mus musculus]	45 kDa	21311891	NP_083042	Tmem43	ENSMUSG00000030095		probable hydrolase PNKD isoform 3 [Mus musculus]	43 kDa	87239984	NP_001034598	Pnkd	ENSMUSG00000026179
							transmembrane protein 53 [Mus musculus]	32 kDa	21312110	NP_081113	Tmem53	ENSMUSG00000048772		neuropathy target esterase [Mus musculus]	147 kDa	170763470	NP_056616	Pnpla6	ENSMUSG00000004565
							transmembrane protein 65 [Mus musculus]	25 kDa	70778812	NP_780421	Tmem65	ENSMUSG00000062373		calcium-independent phospholipase A2-gamma [Mus musculus]	87 kDa	118130807	NP_080440	Pnpla8	ENSMUSG00000036257
							transmembrane protein 93 [Mus musculus]	12 kDa	13384684	NP_079594	Tmem93	ENSMUSG00000047260		polymerase delta-interacting protein 2 [Mus musculus]	42 kDa	14780884	NP_080665	Poldip2	ENSMUSG00000001100
							mitochondrial import receptor subunit TOM34 [Mus musculus]	34 kDa	13385500	NP_080272	Tomm34	ENSMUSG00000018322		peptidyl-prolyl cis-trans isomerase F, mitochondrial precursor [Mus musculus]	22 kDa	19527310	NP_598845	Ppif	ENSMUSG00000021868
							torsin-1A-interacting protein 1 isoform 2 [Mus musculus]	58 kDa	229608944	NP_659040	Tor1aip1	ENSMUSG00000026466		protoporphyrinogen oxidase [Mus musculus]	51 kDa	6679445	NP_032937	Ppox	ENSMUSG00000062729
							tropomyosin alpha-3 chain [Mus musculus]	33 kDa	40254525	NP_071709	Tpm3	ENSMUSG00000027940		protein phosphatase PTC7 homolog [Mus musculus]	33 kDa	46195809	NP_796216	Pptc7	ENSMUSG00000038582
							thiopurine S-methyltransferase [Mus musculus]	28 kDa	253795504	NP_058065	Tpmt	ENSMUSG00000021376		cAMP-dependent protein kinase catalytic subunit beta isoform 4 [Mus musculus]	46 kDa	255958156	NP_001157672	Prkacb	ENSMUSG00000005034
							tripeptidyl-peptidase 2 [Mus musculus]	140 kDa	6678419	NP_033444	Tpp2	ENSMUSG00000041763		proline synthase co-transcribed bacterial homolog protein isoform a [Mus musculus]	30 kDa	16930823	NP_473398	Prosc	ENSMUSG00000031485
							translocating chain-associated membrane protein 1 [Mus musculus]	43 kDa	30794386	NP_082449	Tram1	ENSMUSG00000025935		inactive serine protease 45 precursor [Mus musculus]	36 kDa	23346626	NP_694812	Prss45	ENSMUSG00000047257
							trafficking protein particle complex subunit 2-like protein [Mus musculus]	16 kDa	10946914	NP_067477	Trappc2l	ENSMUSG00000015013		PREDICTED: phosphoserine aminotransferase-like isoform 2 [Mus musculus]	41 kDa	309266230	XP_001478041	Psat1	ENSMUSG00000024640
							trafficking protein particle complex subunit 3 [Mus musculus]	20 kDa	7304929	NP_038746	Trappc3	ENSMUSG00000028847		presenilin-1 [Mus musculus]	53 kDa	6679493	NP_032969	Psen1	ENSMUSG00000019969
							testis-specific serine/threonine-protein kinase 1 [Mus musculus]	42 kDa	112734851	NP_033461	Tssk1	ENSMUSG00000041566		26S proteasome non-ATPase regulatory subunit 7 [Mus musculus]	37 kDa	6754724	NP_034947	Psmd7	ENSMUSG00000039067
							testis-specific serine/threonine-protein kinase 6 [Mus musculus]	30 kDa	14030781	NP_114393	Tssk6	ENSMUSG00000047654		proteasome activator complex subunit 1 [Mus musculus]	29 kDa	6755212	NP_035319	Psme1	ENSMUSG00000022216
							GDP-L-fucose synthase [Mus musculus]	36 kDa	13654268	NP_112478	Tsta3	ENSMUSG00000022570		proteasome activator complex subunit 2 isoform 1 [Mus musculus]	27 kDa	20137004	NP_035320	Psme2	ENSMUSG00000079197
							tetratricopeptide repeat protein 21A [Mus musculus]	149 kDa	225543311	NP_083011	Ttc21a	ENSMUSG00000032514		proteasome activator complex subunit 4 [Mus musculus]	211 kDa	117956381	NP_598774	Psme4	ENSMUSG00000040850
							tetratricopeptide repeat protein 25 [Mus musculus]	72 kDa	124358957	NP_083194	Ttc25	ENSMUSG00000006784		pentatricopeptide repeat-containing protein 2 [Mus musculus]	44 kDa	58037131	NP_081149	Ptcd2	ENSMUSG00000021650
							tetratricopeptide repeat protein 29 [Mus musculus]	54 kDa	268839833	NP_898919	Ttc29	ENSMUSG00000037101		pentatricopeptide repeat-containing protein 3, mitochondrial precursor [Mus musculus]	78 kDa	33469980	NP_081551	Ptcd3	ENSMUSG00000063884
							thioredoxin [Mus musculus]	12 kDa	6755911	NP_035790	Txn1	ENSMUSG00000028367		protein tyrosine phosphatase type IVA 2 [Mus musculus]	19 kDa	258613926	NP_001158217	Ptp4a2	ENSMUSG00000028788
							thioredoxin domain-containing protein 16 [Mus musculus]	92 kDa	27501462	NP_766185	Txndc16	ENSMUSG00000021830		3-hydroxyacyl-CoA dehydratase 2 [Mus musculus]	28 kDa	84872191	NP_076076	Ptplb	ENSMUSG00000035376
							thioredoxin domain-containing protein 3 isoform 1 [Mus musculus]	67 kDa	167000069	NP_853622	Txndc3	ENSMUSG00000041138		tyrosine-protein phosphatase non-receptor type 9 [Mus musculus]	68 kDa	61098100	NP_062625	Ptpn9	ENSMUSG00000032290
							thioredoxin domain-containing protein 8 [Mus musculus]	17 kDa	27229039	NP_080408	Txndc8	ENSMUSG00000038709		peroxisomal membrane protein 2 [Mus musculus]	22 kDa	112421058	NP_033019	Pxmp2	ENSMUSG00000029499
							ubiquitin-like modifier-activating enzyme 1 isoform 2 [Mus musculus]	118 kDa	209862989	NP_001129557	Uba1	ENSMUSG00000001924		peroxisomal membrane protein 4 [Mus musculus]	24 kDa	10946966	NP_067509	Pxmp4	ENSMUSG00000000876
							ubiquitin-conjugating enzyme E2 N [Mus musculus]	17 kDa	18017605	NP_542127	Ube2n	ENSMUSG00000074781		dihydropteridine reductase [Mus musculus]	26 kDa	21312520	NP_077198	Qdpr	ENSMUSG00000015806
							E3 ubiquitin-protein ligase UBR4 [Mus musculus]	572 kDa	237820660	NP_001153791	Ubr4	ENSMUSG00000066036		glutaminyl-peptide cyclotransferase-like protein [Mus musculus]	43 kDa	31560195	NP_080387	Qpctl	ENSMUSG00000030407
							regulator of nonsense transcripts 1 isoform b [Mus musculus]	123 kDa	170784811	NP_109605	Upf1	ENSMUSG00000058301		sulfhydryl oxidase 2 [Mus musculus]	71 kDa	23956334	NP_705787	Qsox2	ENSMUSG00000036327
							probable ubiquitin carboxyl-terminal hydrolase FAF-X [Mus musculus]	290 kDa	115511018	NP_033507	Usp9x	ENSMUSG00000031010		ras-related protein Rab-3A [Mus musculus]	25 kDa	261862303	NP_001159871	Rab3a	ENSMUSG00000031840
							vesicle-associated membrane protein 8 [Mus musculus]	11 kDa	31980629	NP_058074	Vamp8	ENSMUSG00000050732		rab3 GTPase-activating protein non-catalytic subunit [Mus musculus]	155 kDa	255003810	NP_001157226	Rab3gap2	ENSMUSG00000039318
							valyl-tRNA synthetase [Mus musculus]	140 kDa	255069795	NP_035820	Vars	ENSMUSG00000007029		ras-related protein Rab-6A isoform 1 [Mus musculus]	24 kDa	254750706	NP_001157135	Rab6a	ENSMUSG00000030704
							valyl-tRNA synthetase, mitochondrial precursor [Mus musculus]	118 kDa	160333671	NP_780346	Vars2	ENSMUSG00000038838		ras-related protein Rab-8A [Mus musculus]	24 kDa	38372905	NP_075615	Rab8a	ENSMUSG00000003037
							vinculin [Mus musculus]	117 kDa	31543942	NP_033528	Vcl	ENSMUSG00000021823		ras-related C3 botulinum toxin substrate 2 precursor [Mus musculus]	21 kDa	6679601	NP_033034	Rac2	ENSMUSG00000033220
							Williams-Beuren syndrome chromosomal region 16 protein homolog [Mus musculus]	50 kDa	15809010	NP_291050	Wbscr16	ENSMUSG00000061979		ras-related protein Ral-A precursor [Mus musculus]	24 kDa	34328471	NP_062364	Rala	ENSMUSG00000008859
							WD repeat-containing protein 1 [Mus musculus]	66 kDa	6755995	NP_035845	Wdr1	ENSMUSG00000005103		probable arginyl-tRNA synthetase, mitochondrial precursor [Mus musculus]	65 kDa	240120047	NP_852071	Rars2	ENSMUSG00000028292
							WD repeat-containing protein 16 [Mus musculus]	68 kDa	134053952	NP_082239	Wdr16	ENSMUSG00000020904		reticulocalbin-1 precursor [Mus musculus]	38 kDa	6677691	NP_033063	Rcn1	ENSMUSG00000005973
							WD repeat-containing protein 38 [Mus musculus]	33 kDa	58037455	NP_083963	Wdr38	ENSMUSG00000035295		reticulocalbin-2 precursor [Mus musculus]	37 kDa	114205428	NP_036122	Rcn2	ENSMUSG00000032320
							WD repeat-containing protein 65 [Mus musculus]	145 kDa	260064069	NP_081065	Wdr65	ENSMUSG00000028730		retinol dehydrogenase 1 (all trans) [Mus musculus]	36 kDa	165377241	NP_536684	Rdh1	ENSMUSG00000089789
							WAP four-disulfide core domain 10 [Mus musculus]	14 kDa	87196519	NP_001034590	Wfdc10	ENSMUSG00000070529		retinol dehydrogenase 13 [Mus musculus]	36 kDa	30425078	NP_780581	Rdh13	ENSMUSG00000008435
							WAP four-disulfide core domain protein 15B precursor [Mus musculus]	9 kDa	113930767	NP_001039019	Wfdc15b	ENSMUSG00000018211		retinol dehydrogenase 9 [Mus musculus]	36 kDa	23680945	NP_694773	Rdh9	ENSMUSG00000056148
							WAP four-disulfide core domain 16 [Mus musculus]	13 kDa	157951602	NP_001012741	Wfdc16	ENSMUSG00000070530		protein RER1 [Mus musculus]	23 kDa	13385882	NP_080671	Rer1	ENSMUSG00000029048
							WAP four-disulfide core domain 6 [Mus musculus]	17 kDa	237649068	NP_001012743	Wfdc6b	ENSMUSG00000070531		rho-related GTP-binding protein RhoG precursor [Mus musculus]	21 kDa	9625037	NP_062512	Rhog	ENSMUSG00000073982
							tryptophan-rich protein [Mus musculus]	20 kDa	46409250	NP_997184	Wrb	ENSMUSG00000023147		mitochondrial Rho GTPase 1 isoform 2 [Mus musculus]	76 kDa	254039727	NP_001156826	Rhot1	ENSMUSG00000017686
							tyrosyl-tRNA synthetase, mitochondrial precursor [Mus musculus]	53 kDa	39930579	NP_937889	Yars2	ENSMUSG00000022792		mitochondrial Rho GTPase 2 [Mus musculus]	69 kDa	22122457	NP_666111	Rhot2	ENSMUSG00000025733
							14-3-3 protein beta/alpha [Mus musculus]	28 kDa	31543974	NP_061223	Ywhab	ENSMUSG00000018326		required for meiotic nuclear division protein 1 homolog [Mus musculus]	52 kDa	226423886	NP_079619	Rmnd1	ENSMUSG00000019763
							14-3-3 protein epsilon [Mus musculus]	29 kDa	226874906	NP_033562	Ywhae	ENSMUSG00000020849		ribonuclease-like protein 12 precursor [Mus musculus]	17 kDa	59858541	NP_001011875	Rnase12	ENSMUSG00000068407
							zinc finger protein 185 isoform a [Mus musculus]	53 kDa	157823829	NP_033575	Zfp185	ENSMUSG00000031351		ribonuclease-like protein 9 precursor [Mus musculus]	21 kDa	118200345	NP_898853	Rnase9	ENSMUSG00000052382
														ribose-5-phosphate isomerase [Mus musculus]	32 kDa	94536844	NP_033101	Rpia	ENSMUSG00000053604
														60S ribosomal protein L10a [Mus musculus]	25 kDa	255003735	NP_035417	Rpl10a	ENSMUSG00000037805
														PREDICTED: 60S ribosomal protein L13-like [Mus musculus]	24 kDa	149251177	XP_001474740	Rpl13	ENSMUSG00000000740
														60S ribosomal protein L14 [Mus musculus]	24 kDa	13385472	NP_080250	Rpl14	ENSMUSG00000025794
														60S ribosomal protein L17 [Mus musculus]	21 kDa	161484662	NP_001002239	Rpl17	ENSMUSG00000062328
														60S ribosomal protein L23 [Mus musculus]	15 kDa	12584986	NP_075029	Rpl23	ENSMUSG00000071415
														60S ribosomal protein L3 [Mus musculus]	46 kDa	255308899	NP_038790	Rpl3	ENSMUSG00000060036
														60S ribosomal protein L32 [Mus musculus]	16 kDa	25742730	NP_742083	Rpl32	ENSMUSG00000057841
														60S ribosomal protein L37a [Mus musculus]	10 kDa	6677785	NP_033110	Rpl37a	ENSMUSG00000046330
														60S ribosomal protein L38 [Mus musculus]	8 kDa	114205440	NP_001041523	Rpl38	ENSMUSG00000057322
														60S ribosomal protein L4 [Mus musculus]	47 kDa	30794450	NP_077174	Rpl4	ENSMUSG00000032399
														60S ribosomal protein L5 [Mus musculus]	34 kDa	23956082	NP_058676	Rpl5	ENSMUSG00000058558
														60S ribosomal protein L7 [Mus musculus]	31 kDa	31981515	NP_035421	Rpl7	ENSMUSG00000043716
														60S ribosomal protein L8 [Mus musculus]	28 kDa	6755358	NP_036183	Rpl8	ENSMUSG00000003970
														60S ribosomal protein L9 [Mus musculus]	22 kDa	14149647	NP_035422	Rpl9-ps4	ENSMUSG00000071269
														60S acidic ribosomal protein P1 [Mus musculus]	11 kDa	9256519	NP_061341	Rplp1	ENSMUSG00000007892
														60S acidic ribosomal protein P2 [Mus musculus]	12 kDa	83745120	NP_080296	Rplp2	ENSMUSG00000025508
														40S ribosomal protein S10 [Mus musculus]	19 kDa	13399310	NP_080239	Rps10	ENSMUSG00000052146
														40S ribosomal protein S13 [Mus musculus]	17 kDa	13386034	NP_080809	Rps13	ENSMUSG00000090862
														40S ribosomal protein S19 [Mus musculus]	16 kDa	12963511	NP_075622	Rps19	ENSMUSG00000040952
														40S ribosomal protein S2 [Mus musculus]	31 kDa	18087805	NP_032529	Rps2	ENSMUSG00000044533
														40S ribosomal protein S26 [Mus musculus]	13 kDa	255003793	NP_038793	Rps26	ENSMUSG00000025362
														40S ribosomal protein S27 [Mus musculus]	9 kDa	26024336	NP_081291	Rps27	ENSMUSG00000090733
														40S ribosomal protein S7 [Mus musculus]	22 kDa	6755376	NP_035430	Rps7	ENSMUSG00000061477
														PREDICTED: 40S ribosomal protein S8-like isoform 1 [Mus musculus]	24 kDa	149257598	XP_001474155	Rps8	ENSMUSG00000047675
														ribosome-binding protein 1 isoform a [Mus musculus]	158 kDa	124486712	NP_077243	Rrbp1	ENSMUSG00000027422
														reticulon-4 isoform B1 [Mus musculus]	38 kDa	34610233	NP_918941	Rtn4	ENSMUSG00000020458
														reticulon-4-interacting protein 1, mitochondrial precursor [Mus musculus]	43 kDa	31543608	NP_570962	Rtn4ip1	ENSMUSG00000019864
														phosphatidylinositide phosphatase SAC1 [Mus musculus]	67 kDa	13507622	NP_109617	Sacm1l	ENSMUSG00000025240
														GTP-binding protein SAR1a [Mus musculus]	22 kDa	21703344	NP_033146	Sar1a	ENSMUSG00000020088
														sarcosine dehydrogenase, mitochondrial precursor [Mus musculus]	102 kDa	20149748	NP_619606	Sardh	ENSMUSG00000009614
														seryl-tRNA synthetase, mitochondrial precursor [Mus musculus]	58 kDa	228008415	NP_076126	Sars2	ENSMUSG00000070699
														ribosome maturation protein SBDS [Mus musculus]	29 kDa	23956138	NP_075737	Sbds	ENSMUSG00000025337
														protein SCO1 homolog, mitochondrial precursor [Mus musculus]	32 kDa	90991710	NP_001035115	Sco1	ENSMUSG00000069844
														45 kDa calcium-binding protein precursor [Mus musculus]	42 kDa	6755446	NP_035471	Sdf4	ENSMUSG00000029076
														signal peptidase complex catalytic subunit SEC11C [Mus musculus]	22 kDa	21313554	NP_079744	Sec11c	ENSMUSG00000024516
														vesicle-trafficking protein SEC22a [Mus musculus]	35 kDa	27819645	NP_598465	Sec22a	ENSMUSG00000034473
														vesicle-trafficking protein SEC22b [Mus musculus]	25 kDa	6755448	NP_035472	Sec22b	ENSMUSG00000027879
														protein transport protein Sec23A [Mus musculus]	86 kDa	67906177	NP_033173	Sec23a	ENSMUSG00000020986
														SEC23-interacting protein [Mus musculus]	111 kDa	254692911	NP_001025153	Sec23ip	ENSMUSG00000055319
														Sec24 related gene family, member C isoform 1 [Mus musculus]	119 kDa	269954698	NP_766184	Sec24c	ENSMUSG00000039367
														protein transport protein Sec31A [Mus musculus]	134 kDa	244791271	NP_081245	Sec31a	ENSMUSG00000035325
														translocation protein SEC63 homolog [Mus musculus]	88 kDa	158937300	NP_694695	Sec63	ENSMUSG00000019802
														protein sel-1 homolog 1 isoform b [Mus musculus]	82 kDa	46309573	NP_035474	Sel1l	ENSMUSG00000020964
														15 kDa selenoprotein precursor [Mus musculus]	18 kDa	16716395	NP_444332	Sep15	ENSMUSG00000037072
														serine hydrolase-like protein [Mus musculus]	35 kDa	13443008	NP_075964	Serhl	ENSMUSG00000058586
														alpha-1-antitrypsin 1-1 precursor [Mus musculus]	46 kDa	6678079	NP_033269	Serpina1a	ENSMUSG00000066366
														alpha-1-antitrypsin 1-6 isoform 1 precursor [Mus musculus]	46 kDa	259906395	NP_080963	Serpina1f	ENSMUSG00000021081
														sideroflexin-2 [Mus musculus]	36 kDa	86439984	NP_444426	Sfxn2	ENSMUSG00000025036
														nucleotide exchange factor SIL1 precursor [Mus musculus]	52 kDa	257196264	NP_109674	Sil1	ENSMUSG00000024357
														NAD-dependent deacetylase sirtuin-5 [Mus musculus]	34 kDa	30578432	NP_849179	Sirt5	ENSMUSG00000054021
														solute carrier family 12 member 9 [Mus musculus]	96 kDa	281371456	NP_113583	Slc12a9	ENSMUSG00000037344
														monocarboxylate transporter 1 [Mus musculus]	53 kDa	6677995	NP_033222	Slc16a1	ENSMUSG00000032902
														monocarboxylate transporter 2 [Mus musculus]	53 kDa	6755536	NP_035521	Slc16a7	ENSMUSG00000020102
														mitochondrial ornithine transporter 1 isoform 1 [Mus musculus]	33 kDa	31044465	NP_851842	Slc25a15	ENSMUSG00000031482
														graves disease carrier protein homolog [Mus musculus]	36 kDa	30424808	NP_780403	Slc25a16	ENSMUSG00000071253
														peroxisomal membrane protein PMP34 [Mus musculus]	34 kDa	29789024	NP_035529	Slc25a17	ENSMUSG00000022404
														mitochondrial carnitine/acylcarnitine carrier protein CACL [Mus musculus]	33 kDa	31044469	NP_851845	Slc25a29	ENSMUSG00000021265
														kidney mitochondrial carrier protein 1 [Mus musculus]	32 kDa	13385736	NP_080508	Slc25a30	ENSMUSG00000022003
														mitochondrial folate transporter/carrier [Mus musculus]	35 kDa	168480117	NP_765990	Slc25a32	ENSMUSG00000022299
														solute carrier family 25 member 33 [Mus musculus]	35 kDa	117647275	NP_081736	Slc25a33	ENSMUSG00000028982
														solute carrier family 25 member 42 [Mus musculus]	35 kDa	56090652	NP_001007571	Slc25a42	ENSMUSG00000002346
														solute carrier family 25 member 44 isoform a [Mus musculus]	37 kDa	225007568	NP_848811	Slc25a44	ENSMUSG00000050144
														long-chain fatty acid transport protein 4 [Mus musculus]	72 kDa	45597453	NP_036119	Slc27a4	ENSMUSG00000059316
														equilibrative nucleoside transporter 3 [Mus musculus]	52 kDa	12963743	NP_076085	Slc29a3	ENSMUSG00000020100
														zinc transporter 7 [Mus musculus]	42 kDa	12963579	NP_075703	Slc30a7	ENSMUSG00000054414
														adenosine 3'-phospho 5'-phosphosulfate transporter 1 [Mus musculus]	42 kDa	110625963	NP_082938	Slc35b2	ENSMUSG00000037089
														putative sodium-coupled neutral amino acid transporter 10 isoform 2 [Mus musculus]	117 kDa	258645133	NP_001158270	Slc38a10	ENSMUSG00000061306
														zinc transporter SLC39A7 [Mus musculus]	51 kDa	118150668	NP_001071177	Slc39a7	ENSMUSG00000024327
														4F2 cell-surface antigen heavy chain isoform a [Mus musculus]	62 kDa	238637277	NP_001154885	Slc3a2	ENSMUSG00000010095
														sphingomyelin phosphodiesterase 2 [Mus musculus]	47 kDa	6678031	NP_033239	Smpd2	ENSMUSG00000019822
														SNARE-associated protein Snapin [Mus musculus]	15 kDa	19923056	NP_598615	Snapin	ENSMUSG00000001018
														staphylococcal nuclease domain-containing protein 1 [Mus musculus]	102 kDa	77404392	NP_062750	Snd1	ENSMUSG00000001424
														sorting nexin-1 [Mus musculus]	59 kDa	71043944	NP_062701	Snx1	ENSMUSG00000032382
														spatacsin [Mus musculus]	274 kDa	226958532	NP_663506	Spg11	ENSMUSG00000033396
														serine protease inhibitor Kazal-type 8 precursor [Mus musculus]	12 kDa	114145596	NP_898959	Spink8	ENSMUSG00000050074
														eppin precursor [Mus musculus]	15 kDa	19263328	NP_083601	Spinlw1	ENSMUSG00000017733
														kunitz-type protease inhibitor 2 isoform b [Mus musculus]	22 kDa	127139427	NP_001076017	Spint2	ENSMUSG00000074227
														spectrin beta chain, brain 2 [Mus musculus]	271 kDa	55926127	NP_067262	Spnb3	ENSMUSG00000067889
														3-oxo-5-alpha-steroid 4-dehydrogenase 2 [Mus musculus]	29 kDa	16716485	NP_444418	Srd5a2	ENSMUSG00000038541
														beta-galactoside alpha-2,6-sialyltransferase 1 [Mus musculus]	47 kDa	22122355	NP_666045	St6gal1	ENSMUSG00000022885
														dolichyl-diphosphooligosaccharide--protein glycosyltransferase subunit STT3A [Mus musculus]	81 kDa	148747128	NP_032434	Stt3a	ENSMUSG00000032116
														syntaxin-12 [Mus musculus]	31 kDa	19527102	NP_598648	Stx12	ENSMUSG00000028879
														syntaxin-17 [Mus musculus]	33 kDa	84579893	NP_080619	Stx17	ENSMUSG00000061455
														syntaxin-5 [Mus musculus]	40 kDa	268370181	NP_062803	Stx5a	ENSMUSG00000010110
														syntaxin-7 [Mus musculus]	30 kDa	31560462	NP_058077	Stx7	ENSMUSG00000019998
														syntaxin-8 [Mus musculus]	27 kDa	9055356	NP_061238	Stx8	ENSMUSG00000020903
														serine/threonine/tyrosine-interacting-like protein 1 [Mus musculus]	21 kDa	15805022	NP_083935	Styxl1	ENSMUSG00000019178
														ATP-dependent RNA helicase SUPV3L1, mitochondrial precursor [Mus musculus]	87 kDa	31088872	NP_852088	Supv3l1	ENSMUSG00000020079
														nesprin-2 [Mus musculus]	783 kDa	145699091	NP_001005510	Syne2	ENSMUSG00000063450
														synaptojanin-2-binding protein [Mus musculus]	16 kDa	13384642	NP_079568	Synj2bp	ENSMUSG00000090935
														translational activator of cytochrome c oxidase 1 [Mus musculus]	32 kDa	39930435	NP_081622	Taco1	ENSMUSG00000001983
														threonyl-tRNA synthetase, mitochondrial isoform 1 [Mus musculus]	82 kDa	254692865	NP_082207	Tars2	ENSMUSG00000028107
														tafazzin isoform 1 [Mus musculus]	30 kDa	291190859	NP_001167018	Taz	ENSMUSG00000009995
														PREDICTED: protein TBRG4-like [Mus musculus]	61 kDa	149261777	XP_001475770	Tbrg4	ENSMUSG00000000384
														trans-2,3-enoyl-CoA reductase isoform 1 [Mus musculus]	36 kDa	19923070	NP_598879	Tecr	ENSMUSG00000031708
														dimethyladenosine transferase 1, mitochondrial [Mus musculus]	39 kDa	22122569	NP_666186	Tfb1m	ENSMUSG00000036983
														threonine aldolase 1 [Mus musculus]	43 kDa	213512208	NP_082195	Tha1	ENSMUSG00000017713
														mitochondrial import inner membrane translocase subunit Tim22 isoform 1 [Mus musculus]	20 kDa	31543865	NP_062792	Timm22	ENSMUSG00000020843
														mitochondrial import inner membrane translocase subunit Tim8 A [Mus musculus]	11 kDa	7305577	NP_038926	Timm8a1	ENSMUSG00000048007
														mitochondrial import inner membrane translocase subunit Tim9 [Mus musculus]	10 kDa	67846099	NP_001020025	Timm9	ENSMUSG00000021079
														transketolase [Mus musculus]	68 kDa	6678359	NP_033414	Tkt	ENSMUSG00000021957
														talin-1 [Mus musculus]	270 kDa	227116327	NP_035732	Tln1	ENSMUSG00000028465
														delta(14)-sterol reductase [Mus musculus]	47 kDa	117414164	NP_082730	Tm7sf2	ENSMUSG00000024799
														transmembrane 9 superfamily member 3 precursor [Mus musculus]	68 kDa	19111162	NP_579930	Tm9sf3	ENSMUSG00000025016
														transmembrane 9 superfamily member 4 precursor [Mus musculus]	75 kDa	31542095	NP_598608	Tm9sf4	ENSMUSG00000068040
														transmembrane and coiled-coil domain-containing protein 2 [Mus musculus]	21 kDa	124486795	NP_001074781	Tmco2	ENSMUSG00000078577
														transmembrane emp24 domain-containing protein 1 precursor [Mus musculus]	25 kDa	85362703	NP_034874	Tmed1	ENSMUSG00000032180
														transmembrane emp24 protein transport domain containing 7 [Mus musculus]	25 kDa	255003819	NP_079974	Tmed7	ENSMUSG00000033184
														transmembrane protein 109 precursor [Mus musculus]	26 kDa	19527378	NP_598903	Tmem109	ENSMUSG00000034659
														transmembrane protein 111 [Mus musculus]	30 kDa	28827824	NP_780310	Tmem111	ENSMUSG00000030286
														transmembrane protein 165 [Mus musculus]	35 kDa	111154067	NP_035756	Tmem165	ENSMUSG00000029234
														transmembrane protein 186 [Mus musculus]	25 kDa	27228988	NP_079984	Tmem186	ENSMUSG00000043140
														transmembrane protein 192 isoform 2 [Mus musculus]	25 kDa	254939603	NP_001157219	Tmem192	ENSMUSG00000025521
														transmembrane protein 43 [Mus musculus]	45 kDa	21311891	NP_083042	Tmem43	ENSMUSG00000030095
														transmembrane protein 66 [Mus musculus]	39 kDa	158631230	NP_080708	Tmem66	ENSMUSG00000031532
														transmembrane protein 85 [Mus musculus]	20 kDa	13386014	NP_080795	Tmem85	ENSMUSG00000027131
														transmembrane protein 93 [Mus musculus]	12 kDa	13384684	NP_079594	Tmem93	ENSMUSG00000047260
														protein disulfide-isomerase TMX3 precursor [Mus musculus]	52 kDa	117606385	NP_938037	Tmx3	ENSMUSG00000024614
														mitochondrial import receptor subunit TOM20 homolog [Mus musculus]	16 kDa	13324686	NP_077176	Tomm20	ENSMUSG00000058779
														mitochondrial import receptor subunit TOM70 [Mus musculus]	68 kDa	27552760	NP_613065	Tomm70a	ENSMUSG00000022752
														torsin-1A-interacting protein 1 isoform 2 [Mus musculus]	58 kDa	229608944	NP_659040	Tor1aip1	ENSMUSG00000026466
														tropomyosin alpha-3 chain [Mus musculus]	33 kDa	40254525	NP_071709	Tpm3	ENSMUSG00000027940
														thiopurine S-methyltransferase [Mus musculus]	28 kDa	253795504	NP_058065	Tpmt	ENSMUSG00000021376
														traB domain-containing protein [Mus musculus]	42 kDa	117606383	NP_080761	Trabd	ENSMUSG00000015363
														translocating chain-associated membrane protein 1 [Mus musculus]	43 kDa	30794386	NP_082449	Tram1	ENSMUSG00000025935
														trafficking protein particle complex subunit 3 [Mus musculus]	20 kDa	7304929	NP_038746	Trappc3	ENSMUSG00000028847
														hypothetical protein LOC75964 isoform 1 [Mus musculus]	161 kDa	291621688	NP_796012	Trappc8	ENSMUSG00000033382
														mitochondrial tRNA-specific 2-thiouridylase 1 [Mus musculus]	47 kDa	21312518	NP_082339	Trmu	ENSMUSG00000022386
														elongation factor Ts, mitochondrial precursor [Mus musculus]	35 kDa	21313468	NP_079813	Tsfm	ENSMUSG00000040521
														GDP-L-fucose synthase [Mus musculus]	36 kDa	13654268	NP_112478	Tsta3	ENSMUSG00000022570
														tetratricopeptide repeat protein 35 [Mus musculus]	35 kDa	13385196	NP_080012	Ttc35	ENSMUSG00000022337
														thioredoxin [Mus musculus]	12 kDa	6755911	NP_035790	Txn1	ENSMUSG00000028367
														thioredoxin domain-containing protein 12 precursor [Mus musculus]	19 kDa	13384700	NP_079610	Txndc12	ENSMUSG00000028567
														thioredoxin domain-containing protein 8 [Mus musculus]	17 kDa	27229039	NP_080408	Txndc8	ENSMUSG00000038709
														ubiquitin-conjugating enzyme E2 N [Mus musculus]	17 kDa	18017605	NP_542127	Ube2n	ENSMUSG00000074781
														E3 ubiquitin-protein ligase UBR4 [Mus musculus]	572 kDa	237820660	NP_001153791	Ubr4	ENSMUSG00000066036
														regulator of nonsense transcripts 1 isoform b [Mus musculus]	123 kDa	170784811	NP_109605	Upf1	ENSMUSG00000058301
														probable ubiquitin carboxyl-terminal hydrolase FAF-X [Mus musculus]	290 kDa	115511018	NP_033507	Usp9x	ENSMUSG00000031010
														vesicle-associated membrane protein 8 [Mus musculus]	11 kDa	31980629	NP_058074	Vamp8	ENSMUSG00000050732
														vesicle-associated membrane protein-associated protein B [Mus musculus]	27 kDa	31543940	NP_062780	Vapb	ENSMUSG00000054455
														valyl-tRNA synthetase [Mus musculus]	140 kDa	255069795	NP_035820	Vars	ENSMUSG00000007029
														valyl-tRNA synthetase, mitochondrial precursor [Mus musculus]	118 kDa	160333671	NP_780346	Vars2	ENSMUSG00000038838
														synaptic vesicle membrane protein VAT-1 homolog [Mus musculus]	43 kDa	33859662	NP_036167	Vat1	ENSMUSG00000034993
														vinculin [Mus musculus]	117 kDa	31543942	NP_033528	Vcl	ENSMUSG00000021823
														vacuolar ATPase assembly integral membrane protein VMA21 [Mus musculus]	11 kDa	124486867	NP_001074825	Vma21	ENSMUSG00000073131
														vacuolar protein sorting-associated protein 13B [Mus musculus]	444 kDa	194394221	NP_796125	Vps13b	ENSMUSG00000037646
														vacuolar protein sorting-associated protein 13D [Mus musculus]	487 kDa	189491889	NP_001121670	Vps13d	ENSMUSG00000020220
														vacuolar protein sorting-associated protein 35 [Mus musculus]	92 kDa	13928670	NP_075373	Vps35	ENSMUSG00000031696
														vesicle transport through interaction with t-SNAREs homolog 1B [Mus musculus]	27 kDa	31980617	NP_058080	Vti1b	ENSMUSG00000021124
														tryptophanyl-tRNA synthetase, cytoplasmic isoform 2 [Mus musculus]	54 kDa	256818746	NP_001157960	Wars	ENSMUSG00000021266
														tryptophanyl-tRNA synthetase, mitochondrial precursor [Mus musculus]	40 kDa	31543952	NP_081738	Wars2	ENSMUSG00000004233
														Williams-Beuren syndrome chromosomal region 16 protein homolog [Mus musculus]	50 kDa	15809010	NP_291050	Wbscr16	ENSMUSG00000061979
														WD repeat-containing protein 1 [Mus musculus]	66 kDa	6755995	NP_035845	Wdr1	ENSMUSG00000005103
														tryptophan-rich protein [Mus musculus]	20 kDa	46409250	NP_997184	Wrb	ENSMUSG00000023147
														mitochondrial inner membrane protease ATP23 homolog isoform 1 [Mus musculus]	27 kDa	227116360	NP_001153031	Xrcc6bp1	ENSMUSG00000025436
														xylosyltransferase 2 [Mus musculus]	97 kDa	165932343	NP_665827	Xylt2	ENSMUSG00000020868
														tyrosyl-tRNA synthetase, mitochondrial precursor [Mus musculus]	53 kDa	39930579	NP_937889	Yars2	ENSMUSG00000022792
														ATP-dependent zinc metalloprotease YME1L1 [Mus musculus]	80 kDa	7305635	NP_038799	Yme1l1	ENSMUSG00000026775
														14-3-3 protein beta/alpha [Mus musculus]	28 kDa	31543974	NP_061223	Ywhab	ENSMUSG00000018326
														zonadhesin [Mus musculus]	585 kDa	256665241	NP_035871	Zan	ENSMUSG00000079173
														zinc finger protein 185 isoform a [Mus musculus]	53 kDa	157823829	NP_033575	Zfp185	ENSMUSG00000031351
														zinc finger protein-like 1 [Mus musculus]	34 kDa	13195658	NP_077193	Zfpl1	ENSMUSG00000024792
														CAAX prenyl protease 1 homolog [Mus musculus]	55 kDa	27370012	NP_766288	Zmpste24	ENSMUSG00000043207

## Sheet: (B) In Caput & Cauda Only
47 proteins identified in the Caput & Cauda
DESCRIPTION	MW	GI	REFSEQ	GENE NAME	ENSEMBL GENE ID
hypothetical protein LOC75434 [Mus musculus]	23 kDa	21729773	NP_083561	1700001C02Rik	ENSMUSG00000029182
hypothetical protein LOC70564 precursor [Mus musculus]	24 kDa	27229101	NP_081740	5730469M10Rik	ENSMUSG00000021792
hypothetical protein LOC68115 precursor [Mus musculus]	33 kDa	145587094	NP_001074650	9430016H08Rik	ENSMUSG00000025971
acyl-Coenzyme A dehydrogenase family, member 10-like [Mus musculus]	61 kDa	257467675	NP_848914	Acad12	ENSMUSG00000042647
adenylate kinase isoenzyme 1 [Mus musculus]	23 kDa	10946936	NP_067490	Ak1	ENSMUSG00000026817
protein angel homolog 2 [Mus musculus]	62 kDa	70794813	NP_067396	Angel2	ENSMUSG00000026634
signal peptidase complex subunit 3 [Mus musculus]	20 kDa	21617845	NP_083817	Arxes2	ENSMUSG00000048040
bactericidal permeability-increasing protein [Mus musculus]	54 kDa	29244434	NP_808518	Bpi	ENSMUSG00000052922
hypothetical protein LOC223665 isoform 1 [Mus musculus]	24 kDa	21735489	NP_663447	C030006K11Rik	ENSMUSG00000079002
dephospho-CoA kinase domain-containing protein [Mus musculus]	26 kDa	27754054	NP_080827	Dcakd	ENSMUSG00000020935
thymidylate kinase isoform 1 [Mus musculus]	24 kDa	157785665	NP_001099137	Dtymk	ENSMUSG00000026281
fumarylacetoacetate hydrolase domain-containing protein 1 [Mus musculus]	25 kDa	12963697	NP_075969	Fahd1	ENSMUSG00000045316
filaggrin-2 [Mus musculus]	251 kDa	84370015	NP_001013826	Flg2	ENSMUSG00000049133
glutathione peroxidase 1 [Mus musculus]	22 kDa	84871986	NP_032186	Gpx1	ENSMUSG00000063856
glutathione S-transferase Mu 1 [Mus musculus]	26 kDa	6754084	NP_034488	Gstm1	ENSMUSG00000058135
glutathione S-transferase Mu 2 [Mus musculus]	26 kDa	6680121	NP_032209	Gstm2	ENSMUSG00000040562
maleylacetoacetate isomerase [Mus musculus]	24 kDa	6754092	NP_034493	Gstz1	ENSMUSG00000021033
histone H1.4 [Mus musculus]	22 kDa	13430890	NP_056602	Hist1h1e	ENSMUSG00000051627
iron-sulfur cluster co-chaperone protein HscB, mitochondrial precursor [Mus musculus]	27 kDa	225703114	NP_705799	Hscb	ENSMUSG00000043510
isopentenyl-diphosphate Delta-isomerase 1 [Mus musculus]	32 kDa	281604088	NP_663335	Idi1	ENSMUSG00000058258
IZUMO family member 4 [Mus musculus]	26 kDa	89886473	NP_082105	Izumo4	ENSMUSG00000055862
keratin, type II cuticular Hb5 [Mus musculus]	56 kDa	31980832	NP_058575	Krt85
plastin-2 [Mus musculus]	70 kDa	31543113	NP_032905	Lcp1	ENSMUSG00000021998
putative lipoyltransferase 2, mitochondrial precursor [Mus musculus]	25 kDa	229577004	NP_080286	Lipt2	ENSMUSG00000030725
acyl-protein thioesterase 1 [Mus musculus]	25 kDa	6678760	NP_032892	Lypla1	ENSMUSG00000025903
39S ribosomal protein L11, mitochondrial precursor [Mus musculus]	21 kDa	13384980	NP_079829	Mrpl11	ENSMUSG00000024902
ribosome-recycling factor, mitochondrial precursor [Mus musculus]	29 kDa	21312752	NP_080698	Mrrf	ENSMUSG00000026887
peptide methionine sulfoxide reductase [Mus musculus]	26 kDa	31981013	NP_080598	Msra	ENSMUSG00000054733
mimitin, mitochondrial precursor [Mus musculus]	20 kDa	188035926	NP_001120818	Ndufaf2	ENSMUSG00000068184
NADH dehydrogenase [ubiquinone] 1 alpha subcomplex assembly factor 4 [Mus musculus]	20 kDa	21624617	NP_081018	Ndufaf4	ENSMUSG00000028261
NADH dehydrogenase [ubiquinone] flavoprotein 2, mitochondrial precursor [Mus musculus]	27 kDa	110625954	NP_082664	Ndufv2	ENSMUSG00000024099
NFU1 iron-sulfur cluster scaffold homolog, mitochondrial isoform 2 precursor [Mus musculus]	29 kDa	282154801	NP_064429	Nfu1	ENSMUSG00000029993
nipsnap homolog 3A [Mus musculus]	28 kDa	226442909	NP_082805	Nipsnap3a	ENSMUSG00000015242
protein DJ-1 [Mus musculus]	20 kDa	55741460	NP_065594	Park7	ENSMUSG00000028964
peroxisomal membrane protein 11C [Mus musculus]	27 kDa	21735445	NP_081227	Pex11c	ENSMUSG00000069633
membrane-associated progesterone receptor component 1 [Mus musculus]	22 kDa	31980806	NP_058063	Pgrmc1	ENSMUSG00000006373
PREDICTED: peroxiredoxin-6-like, partial [Mus musculus]	27 kDa	309266780	XP_003086860	Prdx6	ENSMUSG00000026701
proteasome subunit alpha type-2 [Mus musculus]	26 kDa	134031994	NP_032970	Psma2	ENSMUSG00000015671
proteasome subunit beta type-1 precursor [Mus musculus]	26 kDa	7242197	NP_035315	Psmb1	ENSMUSG00000014769
ras-related protein Rab-24 [Mus musculus]	23 kDa	6679591	NP_033026	Rab24	ENSMUSG00000034789
oligoribonuclease, mitochondrial precursor [Mus musculus]	27 kDa	27229283	NP_077195	Rexo2	ENSMUSG00000032026
protein S100-A11 [Mus musculus]	11 kDa	21886811	NP_058020	S100a11	ENSMUSG00000027907
stromal cell-derived factor 2-like protein 1 precursor [Mus musculus]	24 kDa	11612505	NP_071719	Sdf2l1	ENSMUSG00000022769
succinate dehydrogenase [ubiquinone] cytochrome b small subunit, mitochondrial [Mus musculus]	17 kDa	27229021	NP_080124	Sdhd	ENSMUSG00000000171
signal peptidase complex subunit 3 [Mus musculus]	20 kDa	125988403	NP_083977	Spcs3	ENSMUSG00000054408
ubiquinol-cytochrome c reductase complex chaperone CBP3 homolog [Mus musculus]	34 kDa	213512915	NP_061376	Uqcc	ENSMUSG00000005882
vitamin K epoxide reductase complex subunit 1 [Mus musculus]	18 kDa	30519915	NP_848715	Vkorc1	ENSMUSG00000030804
